# Supplementary material for: Physiological and Metagenomic Characterizations of the Synergistic Relationships between Ammonia- and Nitrite-Oxidizing Bacteria in Freshwater Nitrification
Source: Front Microbiol. 2018 Feb 27;9:280. doi: 10.3389/fmicb.2018.00280 (PMC5835065; doi:10.3389/fmicb.2018.00280)
Supplement: Supplementary file 3 [file Data_Sheet_3.XLSX]

## Sheet: Bin8.orfs.tsv
Table S7 Putative functions of ORFs of Bin8 in Culture01
a Putative functions were obtained by searching protein sequences against the NCBI non-redundant database using DIAMOND with a minimum sequence identity of 49%.
Gene ID	Contig ID	Start	End	GI Accession	Putative Function a
Culture01_1013_1	Culture01_1013	210	503	85695503	DNA-binding protein [Nitrobacter sp. Nb-311A]
Culture01_1013_3	Culture01_1013	1980	2675	497485021	transcriptional regulator [Nitrobacter sp. Nb-311A]_x0001_
Culture01_1013_5	Culture01_1013	2967	4046	497485023	hypothetical protein [Nitrobacter sp. Nb-311A]_x0001_
Culture01_1013_6	Culture01_1013	4043	5278	497485024	ABC transporter [Nitrobacter sp. Nb-311A]_x0001_
Culture01_1013_7	Culture01_1013	5275	5982	750393493	hypothetical protein, partial [Nitrobacter sp. Nb-311A]
Culture01_1013_8	Culture01_1013	6027	7883	499829699	haloacid dehalogenase [Nitrobacter hamburgensis]_x0001_
Culture01_1013_9	Culture01_1013	8023	8583	499829692	cytochrome B561 [Nitrobacter hamburgensis]_x0001_
Culture01_1013_10	Culture01_1013	9313	12201	497485027	haloacid dehalogenase [Nitrobacter sp. Nb-311A]_x0001_
Culture01_1013_11	Culture01_1013	12330	13169	497485026	universal stress protein UspA [Nitrobacter sp. Nb-311A]_x0001_
Culture01_1013_12	Culture01_1013	13702	14397	91800376	putative signal-transduction protein with CBS domains [Nitrobacter hamburgensis X14]
Culture01_1013_14	Culture01_1013	15988	16809	497485019	universal stress protein UspA [Nitrobacter sp. Nb-311A]_x0001_
Culture01_1013_15	Culture01_1013	16923	17378	497485018	hypothetical protein [Nitrobacter sp. Nb-311A]_x0001_
Culture01_1013_16	Culture01_1013	17489	19465	497485017	protein-L-isoaspartate O-methyltransferase [Nitrobacter sp. Nb-311A]_x0001_
Culture01_1013_17	Culture01_1013	19803	20840	91800360	Alcohol dehydrogenase, zinc-binding protein [Nitrobacter hamburgensis X14]
Culture01_1013_19	Culture01_1013	21253	22086	499829680	universal stress protein UspA [Nitrobacter hamburgensis]_x0001_
Culture01_1013_21	Culture01_1013	22780	23127	85698124	hypothetical protein NB311A_11162 [Nitrobacter sp. Nb-311A]
Culture01_1013_22	Culture01_1013	23396	23743	91800325	hypothetical protein Nham_1890 [Nitrobacter hamburgensis X14]
Culture01_1013_23	Culture01_1013	23822	24931	499829677	hypothetical protein [Nitrobacter hamburgensis]_x0001_
Culture01_1013_24	Culture01_1013	24935	25714	497485011	iron ABC transporter ATP-binding protein [Nitrobacter sp. Nb-311A]_x0001_
Culture01_1013_25	Culture01_1013	25716	26852	752710792	ABC transporter permease [Nitrobacter hamburgensis]
Culture01_1013_26	Culture01_1013	27020	27421	499829674	hypothetical protein [Nitrobacter hamburgensis]_x0001_
Culture01_1013_27	Culture01_1013	27452	30145	499829673	GCN5 family N-acetyltransferase [Nitrobacter hamburgensis]_x0001_
Culture01_1013_28	Culture01_1013	30305	30805	497485007	transcriptional regulator [Nitrobacter sp. Nb-311A]_x0001_
Culture01_1048_2	Culture01_1048	500	1108	497485568	hypothetical protein [Nitrobacter sp. Nb-311A]_x0001_
Culture01_1048_5	Culture01_1048	1925	2416	500170670	hypothetical protein [Methanoculleus marisnigri]_x0001_
Culture01_113_1	Culture01_113	1	408	85697611	hypothetical protein NB311A_18526 [Nitrobacter sp. Nb-311A]
Culture01_113_2	Culture01_113	618	2114	497485822	inosine-5`-monophosphate dehydrogenase [Nitrobacter sp. Nb-311A]_x0001_
Culture01_113_3	Culture01_113	2294	2542	497485820	signal peptide protein [Nitrobacter sp. Nb-311A]_x0001_
Culture01_113_4	Culture01_113	2661	4133	497485819	major facilitator transporter [Nitrobacter sp. Nb-311A]_x0001_
Culture01_113_5	Culture01_113	4285	4956	499634638	methyltransferase [Nitrobacter winogradskyi]_x0001_
Culture01_113_6	Culture01_113	4944	5654	499634639	23S rRNA methyltransferase [Nitrobacter winogradskyi]_x0001_
Culture01_113_7	Culture01_113	5712	6152	497485817	hypothetical protein [Nitrobacter sp. Nb-311A]_x0001_
Culture01_113_8	Culture01_113	6333	6740	497485816	hypothetical protein [Nitrobacter sp. Nb-311A]_x0001_
Culture01_113_9	Culture01_113	6747	7271	497485815	hypothetical protein [Nitrobacter sp. Nb-311A]_x0001_
Culture01_113_10	Culture01_113	7919	8413	497485813	thiol-disulfide isomerase [Nitrobacter sp. Nb-311A]_x0001_
Culture01_113_11	Culture01_113	8410	9618	497485812	glycosyl hydrolase [Nitrobacter sp. Nb-311A]_x0001_
Culture01_1157_3	Culture01_1157	937	2235	654706470	hypothetical protein [Bradyrhizobium elkanii]
Culture01_1157_4	Culture01_1157	2308	2703	499671790	glyoxalase [Burkholderia lata]_x0001_
Culture01_1168_2	Culture01_1168	897	3713	85699639	hypothetical protein NB311A_04324 [Nitrobacter sp. Nb-311A]
Culture01_1168_3	Culture01_1168	4067	5194	497484373	glucokinase [Nitrobacter sp. Nb-311A]_x0001_
Culture01_1168_6	Culture01_1168	6571	8625	497482177	hypothetical protein [Nitrobacter sp. Nb-311A]_x0001_
Culture01_1173_2	Culture01_1173	143	991	497483701	transposase, IS116/IS110/IS902 family [Nitrobacter sp. Nb-311A]_x0001_
Culture01_1173_4	Culture01_1173	1171	1761	85695511	transposase orfB [Nitrobacter sp. Nb-311A]
Culture01_1173_6	Culture01_1173	2551	3915	497483461	histidine kinase [Nitrobacter sp. Nb-311A]_x0001_
Culture01_1173_8	Culture01_1173	4764	7304	653480265	TonB-dependent receptor [Bradyrhizobium sp. Cp5.3]
Culture01_1173_9	Culture01_1173	7714	8403	749819683	Fe(II)-dependent oxygenase [Afipia sp. 1NLS2]
Culture01_1221_5	Culture01_1221	3481	4236	522051549	NmrA family transcriptional regulator [Methylosarcina fibrata]
Culture01_1221_6	Culture01_1221	4304	4693	657882849	cupin [Bradyrhizobium sp. URHD0069]
Culture01_1221_7	Culture01_1221	4982	7327	737717564	hypothetical protein [Bradyrhizobium sp. Cp5.3]
Culture01_1221_8	Culture01_1221	7363	8364	766997672	AraC family transcriptional regulator, partial [Pseudomonas sp. LFM046]
Culture01_1221_11	Culture01_1221	9264	10709	737716777	sulfatase [Bradyrhizobium sp. Cp5.3]
Culture01_1221_13	Culture01_1221	11746	12453	740592348	hypothetical protein, partial [Bradyrhizobium elkanii]
Culture01_1221_14	Culture01_1221	12647	13462	652479179	hypothetical protein [Inquilinus limosus]
Culture01_1221_16	Culture01_1221	13959	14465	653410586	hypothetical protein [Bradyrhizobium sp. Ec3.3]
Culture01_1221_17	Culture01_1221	14500	14856	653457057	hypothetical protein [Bradyrhizobium sp. URHA0002]
Culture01_1227_1	Culture01_1227	1	1182	653522299	chemotaxis protein [Bradyrhizobium sp. URHA0013]
Culture01_1227_2	Culture01_1227	1378	2319	85697005	hypothetical protein NB311A_05700 [Nitrobacter sp. Nb-311A]
Culture01_1227_3	Culture01_1227	2745	4526	750393742	hypothetical protein [Nitrobacter sp. Nb-311A]
Culture01_1227_4	Culture01_1227	4575	4985	752710760	NADH dehydrogenase [Nitrobacter hamburgensis]
Culture01_1227_5	Culture01_1227	5315	5596	497485508	acetyltransferase [Nitrobacter sp. Nb-311A]_x0001_
Culture01_1227_6	Culture01_1227	5622	5894	91800246	acetyltransferase-like protein [Nitrobacter hamburgensis X14]
Culture01_1227_7	Culture01_1227	6002	6376	497485510	hypothetical protein [Nitrobacter sp. Nb-311A]_x0001_
Culture01_1227_8	Culture01_1227	6774	7700	750393746	cytochrome C oxidase subunit I [Nitrobacter sp. Nb-311A]
Culture01_1227_9	Culture01_1227	7976	9409	499634287	tRNA (uracil-5-)-methyltransferase [Nitrobacter winogradskyi]_x0001_
Culture01_1227_10	Culture01_1227	9438	10538	499634288	serine/threonine protein kinase [Nitrobacter winogradskyi]_x0001_
Culture01_1227_11	Culture01_1227	10545	11405	85697014	squalene/phytoene synthase [Nitrobacter sp. Nb-311A]
Culture01_1227_12	Culture01_1227	11567	11953	497485515	membrane protein [Nitrobacter sp. Nb-311A]_x0001_
Culture01_1227_13	Culture01_1227	11950	12990	499634291	preprotein translocase subunit SecF [Nitrobacter winogradskyi]_x0001_
Culture01_1227_14	Culture01_1227	13007	14608	499829561	preprotein translocase subunit SecD [Nitrobacter hamburgensis]_x0001_
Culture01_1227_15	Culture01_1227	14651	15058	499829560	preprotein translocase subunit YajC [Nitrobacter hamburgensis]_x0001_
Culture01_1261_1	Culture01_1261	2	1267	497484418	cobalt chelatase [Nitrobacter sp. Nb-311A]_x0001_
Culture01_1261_2	Culture01_1261	1424	2494	499633002	hypothetical protein [Nitrobacter winogradskyi]_x0001_
Culture01_1261_3	Culture01_1261	2665	2958	497484415	50S ribosomal protein L28 [Nitrobacter sp. Nb-311A]_x0001_
Culture01_1261_4	Culture01_1261	3511	4311	497484414	hypothetical protein [Nitrobacter sp. Nb-311A]_x0001_
Culture01_1261_5	Culture01_1261	4724	8086	499633006	helicase [Nitrobacter winogradskyi]_x0001_
Culture01_1261_6	Culture01_1261	8229	8513	497484412	tRNA synthetase RNA-binding protein [Nitrobacter sp. Nb-311A]_x0001_
Culture01_1261_7	Culture01_1261	8681	9019	497484411	4Fe-4S ferredoxin [Nitrobacter sp. Nb-311A]_x0001_
Culture01_1261_8	Culture01_1261	9434	10270	74419480	transcriptional regulator, CarD family [Nitrobacter winogradskyi Nb-255]
Culture01_1261_9	Culture01_1261	10574	12064	497484408	Zn-dependent protease [Nitrobacter sp. Nb-311A]_x0001_
Culture01_1261_10	Culture01_1261	12210	12932	497484407	nuclease [Nitrobacter sp. Nb-311A]_x0001_
Culture01_1261_11	Culture01_1261	13031	13309	499828370	membrane protein [Nitrobacter hamburgensis]_x0001_
Culture01_1261_12	Culture01_1261	13403	14008	499828371	hypothetical protein [Nitrobacter hamburgensis]_x0001_
Culture01_1261_13	Culture01_1261	14677	14976	763877640	carboxylesterase [Bradyrhizobium sp. LTSP857]
Culture01_1261_14	Culture01_1261	15158	16678	668950482	hypothetical protein FG93_03264 [Bosea sp. LC85]
Culture01_1261_15	Culture01_1261	16698	18104	515307521	hypothetical protein [Bradyrhizobium elkanii]
Culture01_1261_16	Culture01_1261	18116	18625	739238382	hypothetical protein [Rhizobium alamii]
Culture01_1261_17	Culture01_1261	18717	18983	750123352	haloacid dehalogenase [Afipia birgiae]
Culture01_1261_19	Culture01_1261	19247	20224	91801368	protein of unknown function DUF323 [Nitrobacter hamburgensis X14]
Culture01_1261_20	Culture01_1261	20688	21572	518025710	hypothetical protein [Afipia birgiae]
Culture01_1261_21	Culture01_1261	22208	22705	85698171	Sigma 24, ECF subfamily protein [Nitrobacter sp. Nb-311A]
Culture01_1261_22	Culture01_1261	22810	23772	497485060	iron dicitrate transporter FecR [Nitrobacter sp. Nb-311A]_x0001_
Culture01_1261_23	Culture01_1261	23895	24728	74420400	TonB-dependent siderophore receptor [Nitrobacter winogradskyi Nb-255]
Culture01_1289_2	Culture01_1289	254	2326	504825829	heavy metal translocating P-type ATPase [Acidovorax sp. KKS102]_x0001_
Culture01_1289_3	Culture01_1289	2395	2850	504825844	hypothetical protein [Acidovorax sp. KKS102]_x0001_
Culture01_1289_4	Culture01_1289	2926	4248	504825845	heavy metal RND transporter [Acidovorax sp. KKS102]_x0001_
Culture01_1289_5	Culture01_1289	4261	5778	407895662	efflux transporter, rnd family, mfp subunit [Acidovorax sp. KKS102]
Culture01_1289_6	Culture01_1289	5775	8924	504825847	cation transporter [Acidovorax sp. KKS102]_x0001_
Culture01_1289_7	Culture01_1289	9316	9813	407895701	hypothetical protein C380_05985 [Acidovorax sp. KKS102]
Culture01_1289_8	Culture01_1289	9832	10155	407895678	putative cation-transporting ATPase transmembrane protein [Acidovorax sp. KKS102]
Culture01_1290_2	Culture01_1290	1121	3658	170776164	ATPase, P-type (transporting), HAD superfamily, subfamily IC [Leptothrix cholodnii SP-6]
Culture01_1290_4	Culture01_1290	4108	4698	763545632	hypothetical protein RP29_15940 [Acidovorax temperans]
Culture01_1290_5	Culture01_1290	4704	5324	503283732	integrase [Alicycliphilus denitrificans]_x0001_
Culture01_1295_2	Culture01_1295	623	1453	746081553	hypothetical protein [Bradyrhizobium japonicum]
Culture01_1295_8	Culture01_1295	5183	5452	497485291	hypothetical protein [Nitrobacter sp. Nb-311A]_x0001_
Culture01_1310_1	Culture01_1310	3	503	497485523	stationary phase survival protein SurE [Nitrobacter sp. Nb-311A]_x0001_
Culture01_1310_2	Culture01_1310	722	2257	497485525	seryl-tRNA synthetase [Nitrobacter sp. Nb-311A]_x0001_
Culture01_1310_3	Culture01_1310	2363	3172	499634300	preprotein translocase subunit TatC [Nitrobacter winogradskyi]_x0001_
Culture01_1310_4	Culture01_1310	3169	3693	497485527	preprotein translocase subunit TatB [Nitrobacter sp. Nb-311A]_x0001_
Culture01_1310_5	Culture01_1310	3872	4105	499634302	preprotein translocase subunit TatA [Nitrobacter winogradskyi]_x0001_
Culture01_1310_6	Culture01_1310	4266	4931	750393756	protein-L-isoaspartate O-methyltransferase [Nitrobacter sp. Nb-311A]
Culture01_1310_8	Culture01_1310	7402	7908	85696646	hypothetical protein NB311A_05931 [Nitrobacter sp. Nb-311A]
Culture01_1310_13	Culture01_1310	10236	11594	497485556	N-acetylglucosamine-1-phosphate uridyltransferase [Nitrobacter sp. Nb-311A]_x0001_
Culture01_1310_14	Culture01_1310	11739	13082	497485560	hypothetical protein [Nitrobacter sp. Nb-311A]_x0001_
Culture01_1310_15	Culture01_1310	13082	13525	499829544	hypothetical protein [Nitrobacter hamburgensis]_x0001_
Culture01_1310_16	Culture01_1310	13485	15044	85696658	putative beta (1-6) glucans synthase [Nitrobacter sp. Nb-311A]
Culture01_1310_18	Culture01_1310	16108	18774	497485564	glycosyl transferase family 2 [Nitrobacter sp. Nb-311A]_x0001_
Culture01_1343_1	Culture01_1343	148	426	738041686	hypothetical protein [Bradyrhizobium yuanmingense]
Culture01_1343_2	Culture01_1343	668	1135	517131520	TonB dependent/Ligand-Gated channel TonB [Bradyrhizobium sp. WSM2793]
Culture01_1343_4	Culture01_1343	2014	4044	497482794	hypothetical protein [Nitrobacter sp. Nb-311A]_x0001_
Culture01_1343_5	Culture01_1343	4044	7835	497482793	hypothetical protein [Nitrobacter sp. Nb-311A]_x0001_
Culture01_1368_2	Culture01_1368	709	1218	506413948	N-acetyltransferase GCN5 [Methylobacterium nodulans]_x0001_
Culture01_1368_5	Culture01_1368	4105	4677	750392105	resolvase, partial [Nitrobacter sp. Nb-311A]
Culture01_1368_8	Culture01_1368	5810	7780	500989863	hypothetical protein [Bradyrhizobium sp. BTAi1]_x0001_
Culture01_1368_9	Culture01_1368	7990	8796	640422036	hypothetical protein [Ochrobactrum rhizosphaerae]
Culture01_1368_11	Culture01_1368	9406	10041	497483139	DNA-methyltransferase [Nitrobacter sp. Nb-311A]_x0001_
Culture01_1368_12	Culture01_1368	10254	11189	146195988	Hypothetical protein; putative FtsK/SpoIIIE family protein [Bradyrhizobium sp. ORS 278]
Culture01_1368_14	Culture01_1368	11668	11997	146195985	hypothetical protein BRADO6380 [Bradyrhizobium sp. ORS 278]
Culture01_1368_15	Culture01_1368	12054	13229	146195984	hypothetical protein; putative replication protein [Bradyrhizobium sp. ORS 278]
Culture01_1368_17	Culture01_1368	13624	14388	754124125	hypothetical protein [Bradyrhizobium sp. ORS 278]
Culture01_1368_18	Culture01_1368	14418	14705	146195981	hypothetical protein BRADO6376 [Bradyrhizobium sp. ORS 278]
Culture01_1368_20	Culture01_1368	16773	17048	497483522	hypothetical protein [Nitrobacter sp. Nb-311A]_x0001_
Culture01_1368_21	Culture01_1368	17102	19582	750392248	haloacid dehalogenase [Nitrobacter sp. Nb-311A]
Culture01_1368_22	Culture01_1368	19607	20044	499831080	hypothetical protein [Nitrobacter hamburgensis]_x0001_
Culture01_1368_23	Culture01_1368	20315	20920	497483527	superoxide dismutase [Nitrobacter sp. Nb-311A]_x0001_
Culture01_1368_25	Culture01_1368	21409	22260	499831075	ABC transporter [Nitrobacter hamburgensis]_x0001_
Culture01_1368_26	Culture01_1368	22267	23136	499633484	zinc ABC transporter permease [Nitrobacter winogradskyi]_x0001_
Culture01_1368_27	Culture01_1368	23136	24077	497483531	metal ABC transporter substrate-binding protein [Nitrobacter sp. Nb-311A]_x0001_
Culture01_1368_28	Culture01_1368	24198	25274	750392250	cobalamin biosynthesis protein CobW [Nitrobacter sp. Nb-311A]
Culture01_1368_29	Culture01_1368	25274	26287	497483533	hypothetical protein [Nitrobacter sp. Nb-311A]_x0001_
Culture01_1368_30	Culture01_1368	26445	26792	497483534	hypothetical protein [Nitrobacter sp. Nb-311A]_x0001_
Culture01_1368_31	Culture01_1368	26862	28295	85697291	homospermidine synthase [Nitrobacter sp. Nb-311A]
Culture01_1368_32	Culture01_1368	28440	29396	752711191	cobalt transporter [Nitrobacter hamburgensis]
Culture01_1368_33	Culture01_1368	29486	29944	497483537	nucleoside diphosphate kinase [Nitrobacter sp. Nb-311A]_x0001_
Culture01_1383_1	Culture01_1383	1	462	648658024	Vi polysaccharide biosynthesis protein VipA/TviB [Bordetella sp. FB-8]
Culture01_1383_2	Culture01_1383	696	2189	407747861	sugar transferase [Agrobacterium albertimagni AOL15]
Culture01_1383_3	Culture01_1383	2468	3736	497482573	polymerase [Nitrobacter sp. Nb-311A]_x0001_
Culture01_1383_4	Culture01_1383	3957	4217	497484926	spore coat protein [Nitrobacter sp. Nb-311A]_x0001_
Culture01_1397_1	Culture01_1397	1704	3233	85698333	hypothetical protein NB311A_01829 [Nitrobacter sp. Nb-311A]
Culture01_1404_1	Culture01_1404	1	1032	499633123	flagellar biosynthesis protein FlhA [Nitrobacter winogradskyi]_x0001_
Culture01_1404_3	Culture01_1404	1753	2178	497484268	flagellar export protein FliJ [Nitrobacter sp. Nb-311A]_x0001_
Culture01_1404_4	Culture01_1404	2284	3537	497484269	ATP synthase [Nitrobacter sp. Nb-311A]_x0001_
Culture01_1482_1	Culture01_1482	254	568	499635562	signal peptide protein [Nitrobacter winogradskyi]_x0001_
Culture01_1482_2	Culture01_1482	864	1187	499635564	30S ribosomal protein S20 [Nitrobacter winogradskyi]_x0001_
Culture01_1482_3	Culture01_1482	2480	3973	85699090	chromosomal replication initiator protein, DnaA [Nitrobacter sp. Nb-311A]
Culture01_1482_4	Culture01_1482	4176	5294	497482240	DNA polymerase III subunit beta [Nitrobacter sp. Nb-311A]_x0001_
Culture01_1482_5	Culture01_1482	5459	6610	74419072	DNA replication and repair protein RecF [Nitrobacter winogradskyi Nb-255]
Culture01_1482_6	Culture01_1482	6914	8953	653422202	hypothetical protein [Bradyrhizobium sp. Ec3.3]
Culture01_1482_7	Culture01_1482	9296	11737	497482243	DNA gyrase subunit B [Nitrobacter sp. Nb-311A]_x0001_
Culture01_1482_8	Culture01_1482	11831	12451	74419074	conserved hypothetical protein [Nitrobacter winogradskyi Nb-255]
Culture01_1482_9	Culture01_1482	12623	13993	497482246	glutamate--cysteine ligase [Nitrobacter sp. Nb-311A]_x0001_
Culture01_1482_10	Culture01_1482	14628	17828	497482248	hypothetical protein [Nitrobacter sp. Nb-311A]_x0001_
Culture01_1482_11	Culture01_1482	18010	18936	750391796	permease [Nitrobacter sp. Nb-311A]
Culture01_1482_12	Culture01_1482	18939	19721	85699101	hypothetical protein NB311A_07463 [Nitrobacter sp. Nb-311A]
Culture01_1482_13	Culture01_1482	19741	21045	544642559	metal ion (Mn2+/Fe2+) transporter (Nramp) family metal ion transporter [Bradyrhizobium sp. DFCI-1]_x0001_
Culture01_1482_14	Culture01_1482	21205	21870	499828113	metallophosphatase [Nitrobacter hamburgensis]_x0001_
Culture01_1482_16	Culture01_1482	22120	24657	497482252	helicase [Nitrobacter sp. Nb-311A]_x0001_
Culture01_1482_17	Culture01_1482	24957	26333	497482253	membrane protein [Nitrobacter sp. Nb-311A]_x0001_
Culture01_1482_18	Culture01_1482	26994	27914	497482255	heat shock protein HtpX [Nitrobacter sp. Nb-311A]_x0001_
Culture01_1482_19	Culture01_1482	28084	29166	739407863	flagellar motor protein MotB [Rhodopseudomonas palustris]
Culture01_1482_20	Culture01_1482	29402	32167	497482256	histidine kinase [Nitrobacter sp. Nb-311A]_x0001_
Culture01_1482_21	Culture01_1482	32249	32917	497482257	hypothetical protein [Nitrobacter sp. Nb-311A]_x0001_
Culture01_1482_22	Culture01_1482	33205	33696	497482259	hypothetical protein [Nitrobacter sp. Nb-311A]_x0001_
Culture01_1482_23	Culture01_1482	33820	34374	497482261	chemotaxis protein CheY [Nitrobacter sp. Nb-311A]_x0001_
Culture01_1482_24	Culture01_1482	34466	35806	497482262	ATPase [Nitrobacter sp. Nb-311A]_x0001_
Culture01_1482_25	Culture01_1482	36114	37421	497482265	esterase [Nitrobacter sp. Nb-311A]_x0001_
Culture01_1482_26	Culture01_1482	37761	38513	85699117	hypothetical protein NB311A_07543 [Nitrobacter sp. Nb-311A]
Culture01_1482_27	Culture01_1482	38588	40771	497482267	penicillin-binding protein 1A [Nitrobacter sp. Nb-311A]_x0001_
Culture01_1482_28	Culture01_1482	41068	43842	497482268	PII uridylyl-transferase [Nitrobacter sp. Nb-311A]_x0001_
Culture01_1482_29	Culture01_1482	44142	45134	497482269	molecular chaperone Hsp33 [Nitrobacter sp. Nb-311A]_x0001_
Culture01_1482_30	Culture01_1482	45153	45548	497482270	ApaG [Nitrobacter sp. Nb-311A]_x0001_
Culture01_1482_31	Culture01_1482	45753	47000	497482271	membrane protein [Nitrobacter sp. Nb-311A]_x0001_
Culture01_1482_32	Culture01_1482	46997	47758	497482272	hypothetical protein [Nitrobacter sp. Nb-311A]_x0001_
Culture01_1482_33	Culture01_1482	47758	48723	499828092	GDSL family lipase [Nitrobacter hamburgensis]_x0001_
Culture01_1482_34	Culture01_1482	48763	49956	499632742	O-succinylhomoserine sulfhydrylase [Nitrobacter winogradskyi]_x0001_
Culture01_1482_35	Culture01_1482	50278	51384	497482274	2'-deoxycytidine 5'-triphosphate deaminase [Nitrobacter sp. Nb-311A]_x0001_
Culture01_1482_37	Culture01_1482	51823	52203	116243211	CRCB1_NITHX RecName: Full=Putative fluoride ion transporter CrcB 1 [Nitrobacter hamburgensis X14]
Culture01_1482_38	Culture01_1482	52433	52789	499828087	amicyanin [Nitrobacter hamburgensis]_x0001_
Culture01_1482_39	Culture01_1482	52798	53319	499828086	membrane protein [Nitrobacter hamburgensis]_x0001_
Culture01_1482_40	Culture01_1482	53415	54110	91798738	sigma-24 (FecI-like) [Nitrobacter hamburgensis X14]
Culture01_1482_41	Culture01_1482	55302	55898	497482279	copper-binding protein [Nitrobacter sp. Nb-311A]_x0001_
Culture01_1482_42	Culture01_1482	55889	57952	639254026	MULTISPECIES: glycosyl transferase family 2 [Afipia]
Culture01_1482_43	Culture01_1482	58001	58909	499632753	ABC transporter substrate-binding protein [Nitrobacter winogradskyi]_x0001_
Culture01_1482_44	Culture01_1482	58966	60597	85699134	lysyl-tRNA synthetase [Nitrobacter sp. Nb-311A]
Culture01_1482_45	Culture01_1482	60690	61208	497482284	hypothetical protein [Nitrobacter sp. Nb-311A]_x0001_
Culture01_1482_46	Culture01_1482	61321	61923	85699136	orotate phosphoribosyltransferase [Nitrobacter sp. Nb-311A]
Culture01_1482_47	Culture01_1482	62002	62490	85699137	nuclease (SNase-like) [Nitrobacter sp. Nb-311A]
Culture01_1482_49	Culture01_1482	63048	64400	85699140	tRNA and rRNA methylase [Nitrobacter sp. Nb-311A]
Culture01_1482_50	Culture01_1482	64447	66282	499632760	heparinase [Nitrobacter winogradskyi]_x0001_
Culture01_1482_51	Culture01_1482	66476	68068	497482291	purine biosynthesis protein purH [Nitrobacter sp. Nb-311A]_x0001_
Culture01_1482_52	Culture01_1482	68210	68881	497482292	cytochrome C [Nitrobacter sp. Nb-311A]_x0001_
Culture01_1482_53	Culture01_1482	68949	69260	499828066	cytochrome C [Nitrobacter hamburgensis]_x0001_
Culture01_1482_54	Culture01_1482	69275	70687	85699144	major facilitator superfamily protein [Nitrobacter sp. Nb-311A]
Culture01_1482_55	Culture01_1482	70770	72527	499632764	gamma-glutamyltransferase [Nitrobacter winogradskyi]_x0001_
Culture01_1482_56	Culture01_1482	72645	73241	499828061	hypothetical protein [Nitrobacter hamburgensis]_x0001_
Culture01_1482_57	Culture01_1482	73363	74283	499828059	2-dehydropantoate 2-reductase [Nitrobacter hamburgensis]_x0001_
Culture01_1482_58	Culture01_1482	74339	75031	497482296	glutathione S-transferase [Nitrobacter sp. Nb-311A]_x0001_
Culture01_1482_59	Culture01_1482	75249	76055	497482297	UDP pyrophosphate phosphatase [Nitrobacter sp. Nb-311A]_x0001_
Culture01_1482_60	Culture01_1482	76145	77113	497482298	3-beta-hydroxy-delta(5)-steroid dehydrogenase [Nitrobacter sp. Nb-311A]_x0001_
Culture01_1482_61	Culture01_1482	77762	78583	85699152	hypothetical protein NB311A_07718 [Nitrobacter sp. Nb-311A]
Culture01_1482_63	Culture01_1482	79235	79915	497482302	endonuclease [Nitrobacter sp. Nb-311A]_x0001_
Culture01_1482_64	Culture01_1482	79912	81936	497482303	phospholipase [Nitrobacter sp. Nb-311A]_x0001_
Culture01_1482_65	Culture01_1482	82239	82832	85699155	TPR repeat protein [Nitrobacter sp. Nb-311A]
Culture01_1482_66	Culture01_1482	82984	83340	497482305	hypothetical protein [Nitrobacter sp. Nb-311A]_x0001_
Culture01_1482_67	Culture01_1482	83456	84232	499828053	hypothetical protein [Nitrobacter hamburgensis]_x0001_
Culture01_1482_68	Culture01_1482	84613	85233	497482306	3'-5' exonuclease [Nitrobacter sp. Nb-311A]_x0001_
Culture01_1482_69	Culture01_1482	85465	86157	497482307	hypothetical protein [Nitrobacter sp. Nb-311A]_x0001_
Culture01_1482_70	Culture01_1482	86154	86843	499828050	organic solvent tolerance protein OstA [Nitrobacter hamburgensis]_x0001_
Culture01_1482_71	Culture01_1482	87045	88061	497482309	ABC transporter ATP-binding protein [Nitrobacter sp. Nb-311A]_x0001_
Culture01_1482_73	Culture01_1482	88583	88972	499632779	hypothetical protein [Nitrobacter winogradskyi]_x0001_
Culture01_1482_74	Culture01_1482	89061	90701	750391754	RNA polymerase sigma54 factor [Nitrobacter sp. Nb-311A]
Culture01_1482_75	Culture01_1482	90758	91354	85699164	sigma 54 modulation protein/ribosomal protein S30EA [Nitrobacter sp. Nb-311A]
Culture01_1482_76	Culture01_1482	91593	92054	499828044	nitrogen regulatory protein [Nitrobacter hamburgensis]_x0001_
Culture01_1482_77	Culture01_1482	92373	94217	750391755	dihydroxy-acid dehydratase [Nitrobacter sp. Nb-311A]
Culture01_1482_78	Culture01_1482	94567	94833	497482317	hypothetical protein [Nitrobacter sp. Nb-311A]_x0001_
Culture01_1482_79	Culture01_1482	94935	95360	497482318	MULTISPECIES: heat shock protein Hsp20 [Nitrobacter]_x0001_
Culture01_1482_80	Culture01_1482	95853	96269	497482319	hypothetical protein [Nitrobacter sp. Nb-311A]_x0001_
Culture01_1482_81	Culture01_1482	96415	97761	499632811	3-phosphoshikimate 1-carboxyvinyltransferase [Nitrobacter winogradskyi]_x0001_
Culture01_1482_82	Culture01_1482	97758	98396	497482321	cytidylate kinase [Nitrobacter sp. Nb-311A]_x0001_
Culture01_1482_83	Culture01_1482	98425	99132	499632809	methyltransferase FkbM [Nitrobacter winogradskyi]_x0001_
Culture01_1482_84	Culture01_1482	99575	101278	497482323	30S ribosomal protein S1 [Nitrobacter sp. Nb-311A]_x0001_
Culture01_1482_85	Culture01_1482	101439	102368	85699175	endonuclease III/Nth [Nitrobacter sp. Nb-311A]
Culture01_1482_86	Culture01_1482	102467	102886	499828034	membrane protein [Nitrobacter hamburgensis]_x0001_
Culture01_1482_87	Culture01_1482	102940	103839	74419272	DNA-O6-methylguanine--protein-cysteine S-methyltransferase [Nitrobacter winogradskyi Nb-255]
Culture01_1482_88	Culture01_1482	103951	104574	499632804	phosphoglyceromutase [Nitrobacter winogradskyi]_x0001_
Culture01_1482_89	Culture01_1482	104599	105402	85699179	dihydrodipicolinate reductase [Nitrobacter sp. Nb-311A]
Culture01_1482_90	Culture01_1482	105506	106150	750391812	NADPH-dependent FMN reductase [Nitrobacter sp. Nb-311A]
Culture01_1482_91	Culture01_1482	106385	106987	750391757	methyltransferase [Nitrobacter sp. Nb-311A]
Culture01_1482_92	Culture01_1482	107080	108216	497482331	molecular chaperone DnaJ [Nitrobacter sp. Nb-311A]_x0001_
Culture01_1482_93	Culture01_1482	108371	110269	497482332	chaperone protein DnaK [Nitrobacter sp. Nb-311A]_x0001_
Culture01_1482_94	Culture01_1482	110668	111606	497482333	signal peptide protein [Nitrobacter sp. Nb-311A]_x0001_
Culture01_1482_95	Culture01_1482	111760	112353	752710392	co-chaperone GrpE [Nitrobacter hamburgensis]
Culture01_1482_96	Culture01_1482	112455	113543	750391813	heat-inducible transcription repressor [Nitrobacter sp. Nb-311A]
Culture01_1482_97	Culture01_1482	113716	114429	497482336	ribonuclease PH [Nitrobacter sp. Nb-311A]_x0001_
Culture01_1482_98	Culture01_1482	114578	115213	497482337	nucleoside-triphosphate diphosphatase [Nitrobacter sp. Nb-311A]_x0001_
Culture01_1482_99	Culture01_1482	115200	116360	499828022	coproporphyrinogen III oxidase [Nitrobacter hamburgensis]_x0001_
Culture01_1482_100	Culture01_1482	116489	117706	85699190	hypothetical protein NB311A_07908 [Nitrobacter sp. Nb-311A]
Culture01_1482_101	Culture01_1482	117978	118931	85699191	hypothetical protein NB311A_07913 [Nitrobacter sp. Nb-311A]
Culture01_1482_102	Culture01_1482	118918	119325	497482341	hypothetical protein [Nitrobacter sp. Nb-311A]_x0001_
Culture01_1482_103	Culture01_1482	119374	120315	497482342	glutathione synthetase [Nitrobacter sp. Nb-311A]_x0001_
Culture01_1482_104	Culture01_1482	120408	121070	499632721	ATPase AAA [Nitrobacter winogradskyi]_x0001_
Culture01_1482_105	Culture01_1482	121148	122863	497420498	site-specific recombinase [Bradyrhizobiaceae bacterium SG-6C]_x0001_
Culture01_1482_110	Culture01_1482	127489	127908	488801474	hypothetical protein [Afipia clevelandensis]_x0001_
Culture01_150_1	Culture01_150	124	828	78271513	nitrite oxidoreductase [Nitrobacter vulgaris]_x0001_
Culture01_150_2	Culture01_150	822	4466	33340804	nitrite oxidoreductase alpha subunit [Nitrobacter vulgaris]
Culture01_150_3	Culture01_150	4466	5446	497485989	cytochrome C [Nitrobacter sp. Nb-311A]_x0001_
Culture01_150_4	Culture01_150	6099	6845	497485991	hypothetical protein [Nitrobacter sp. Nb-311A]_x0001_
Culture01_150_5	Culture01_150	7063	8484	499633351	glycosyl transferase [Nitrobacter winogradskyi]_x0001_
Culture01_150_6	Culture01_150	8840	10813	497485992	cytochrome O ubiquinol oxidase [Nitrobacter sp. Nb-311A]_x0001_
Culture01_150_7	Culture01_150	10810	11424	499831097	cytochrome O ubiquinol oxidase [Nitrobacter hamburgensis]_x0001_
Culture01_150_8	Culture01_150	11485	11763	85696079	Cytochrome C oxidase subunit IV [Nitrobacter sp. Nb-311A]
Culture01_150_9	Culture01_150	12367	13125	497485996	hypothetical protein [Nitrobacter sp. Nb-311A]_x0001_
Culture01_150_10	Culture01_150	13122	13538	499633347	hypothetical protein [Nitrobacter winogradskyi]_x0001_
Culture01_154_4	Culture01_154	1359	1958	499831565	hypothetical protein [Nitrobacter hamburgensis]_x0001_
Culture01_154_6	Culture01_154	3388	4041	499831494	DNA repair protein [Nitrobacter hamburgensis]_x0001_
Culture01_154_7	Culture01_154	4330	4605	381362107	hypothetical protein S23_57460 [Bradyrhizobium sp. S23321]
Culture01_154_8	Culture01_154	5124	5609	85698353	hypothetical protein NB311A_01929 [Nitrobacter sp. Nb-311A]
Culture01_154_10	Culture01_154	9297	10211	499635368	CbbX [Nitrobacter winogradskyi]_x0001_
Culture01_154_11	Culture01_154	10371	10796	499635369	ribulose bisphosphate carboxylase small chain [Nitrobacter winogradskyi]_x0001_
Culture01_154_12	Culture01_154	10808	12277	499635370	ribulose bisophosphate carboxylase [Nitrobacter winogradskyi]_x0001_
Culture01_154_13	Culture01_154	12836	13516	497482899	LysR family transcriptional regulator [Nitrobacter sp. Nb-311A]_x0001_
Culture01_1604_1	Culture01_1604	1	240	497485523	stationary phase survival protein SurE [Nitrobacter sp. Nb-311A]_x0001_
Culture01_1604_2	Culture01_1604	318	698	497485522	chemotaxis protein CheY [Nitrobacter sp. Nb-311A]_x0001_
Culture01_1604_3	Culture01_1604	925	1578	497485521	protein-L-isoaspartate O-methyltransferase [Nitrobacter sp. Nb-311A]_x0001_
Culture01_1604_4	Culture01_1604	1721	3040	497485520	hypothetical protein [Nitrobacter sp. Nb-311A]_x0001_
Culture01_1604_5	Culture01_1604	3197	4384	499829558	chromate transporter [Nitrobacter hamburgensis]_x0001_
Culture01_1604_6	Culture01_1604	4401	5372	499634294	ATPase AAA [Nitrobacter winogradskyi]_x0001_
Culture01_1625_2	Culture01_1625	664	1116	74419826	Protein of unknown function UPF0066 [Nitrobacter winogradskyi Nb-255]
Culture01_1625_3	Culture01_1625	1194	2462	497482868	hypothetical protein [Nitrobacter sp. Nb-311A]_x0001_
Culture01_1625_4	Culture01_1625	2829	3053	750391928	hypothetical protein [Nitrobacter sp. Nb-311A]
Culture01_1625_5	Culture01_1625	3480	3752	497482866	hypothetical protein [Nitrobacter sp. Nb-311A]_x0001_
Culture01_1625_7	Culture01_1625	4063	5133	497482865	cobalamin biosynthesis protein CobW [Nitrobacter sp. Nb-311A]_x0001_
Culture01_1625_9	Culture01_1625	7484	8227	499633296	hypothetical protein [Nitrobacter winogradskyi]_x0001_
Culture01_1625_10	Culture01_1625	8913	9320	85698396	hypothetical protein NB311A_02144 [Nitrobacter sp. Nb-311A]
Culture01_1625_11	Culture01_1625	9914	10468	74419779	cytochrome c, class I [Nitrobacter winogradskyi Nb-255]
Culture01_1625_12	Culture01_1625	10838	12103	497482858	diaminopimelate decarboxylase [Nitrobacter sp. Nb-311A]_x0001_
Culture01_1625_13	Culture01_1625	12262	12690	499633300	hypothetical protein [Nitrobacter winogradskyi]_x0001_
Culture01_1625_14	Culture01_1625	12644	14026	499633301	argininosuccinate lyase [Nitrobacter winogradskyi]_x0001_
Culture01_1625_15	Culture01_1625	14138	14809	85698390	thioredoxin-like protein [Nitrobacter sp. Nb-311A]
Culture01_1625_16	Culture01_1625	14907	15266	497482854	hypothetical protein [Nitrobacter sp. Nb-311A]_x0001_
Culture01_1625_17	Culture01_1625	15293	15691	497482853	glyoxalase [Nitrobacter sp. Nb-311A]_x0001_
Culture01_1625_19	Culture01_1625	16040	16912	499633340	3-hydroxybutyryl-CoA dehydrogenase [Nitrobacter winogradskyi]_x0001_
Culture01_1625_20	Culture01_1625	17025	17969	497482850	electron transfer flavoprotein subunit beta [Nitrobacter sp. Nb-311A]_x0001_
Culture01_1625_21	Culture01_1625	17969	18718	497482849	electron transfer flavoprotein subunit beta [Nitrobacter sp. Nb-311A]_x0001_
Culture01_1625_22	Culture01_1625	18871	19443	499633337	cob(I)yrinic acid a,c-diamide adenosyltransferase [Nitrobacter winogradskyi]_x0001_
Culture01_1625_24	Culture01_1625	19844	20704	499633335	ribonuclease BN [Nitrobacter winogradskyi]_x0001_
Culture01_1625_25	Culture01_1625	20631	21917	750391955	histidine kinase [Nitrobacter sp. Nb-311A]
Culture01_1625_26	Culture01_1625	22008	22805	499633333	glutamyl-Q tRNA(Asp) ligase [Nitrobacter winogradskyi]_x0001_
Culture01_1625_27	Culture01_1625	22926	23579	499633332	DNA-3-methyladenine glycosidase [Nitrobacter winogradskyi]_x0001_
Culture01_1625_28	Culture01_1625	23690	25036	85698377	two-component hybrid sensor and regulator [Nitrobacter sp. Nb-311A]
Culture01_1636_3	Culture01_1636	859	1176	752710539	hypothetical protein [Nitrobacter hamburgensis]
Culture01_1636_4	Culture01_1636	1257	1742	499828574	cupin [Nitrobacter hamburgensis]_x0001_
Culture01_1636_6	Culture01_1636	2389	3312	696336454	phenol degradation protein meta [Yersinia frederiksenii]_x0001_
Culture01_1636_7	Culture01_1636	3368	5014	763872243	hypothetical protein UP06_38150 [Bradyrhizobium sp. LTSP857]_x0001_
Culture01_1636_8	Culture01_1636	5587	6828	497482742	monooxygenase [Nitrobacter sp. Nb-311A]_x0001_
Culture01_1636_9	Culture01_1636	7380	8006	499633307	glutathione S-transferase [Nitrobacter winogradskyi]_x0001_
Culture01_1636_10	Culture01_1636	8003	8989	85698273	hypothetical protein NB311A_01529 [Nitrobacter sp. Nb-311A]
Culture01_1636_11	Culture01_1636	9394	9882	639180038	peptidoglycan-binding protein [Bradyrhizobium sp. Tv2a-2]
Culture01_1636_14	Culture01_1636	11426	12070	750394245	hypothetical protein [Nitrobacter sp. Nb-311A]
Culture01_164_1	Culture01_164	315	587	497483667	hypothetical protein [Nitrobacter sp. Nb-311A]_x0001_
Culture01_164_2	Culture01_164	833	1447	499635468	pyridoxamine 5'-phosphate oxidase [Nitrobacter winogradskyi]_x0001_
Culture01_164_3	Culture01_164	1581	3512	499635467	cell envelope biogenesis protein AsmA [Nitrobacter winogradskyi]_x0001_
Culture01_164_4	Culture01_164	3708	6830	497483671	ABC transporter permease [Nitrobacter sp. Nb-311A]_x0001_
Culture01_164_5	Culture01_164	6830	7678	85696405	Secretion protein HlyD [Nitrobacter sp. Nb-311A]
Culture01_164_6	Culture01_164	7868	9337	85696406	Peptidase C14 [Nitrobacter sp. Nb-311A]
Culture01_164_7	Culture01_164	9541	10179	750392407	flagellar motor protein MotB [Nitrobacter sp. Nb-311A]
Culture01_164_8	Culture01_164	10604	12049	750392411	MFS transporter [Nitrobacter sp. Nb-311A]
Culture01_164_9	Culture01_164	12046	12855	750392373	trehalose phosphatase [Nitrobacter sp. Nb-311A]
Culture01_164_10	Culture01_164	12852	14645	499635459	glucoamylase [Nitrobacter winogradskyi]_x0001_
Culture01_164_11	Culture01_164	14826	16301	750392413	alpha,alpha-trehalose-phosphate synthase [Nitrobacter sp. Nb-311A]
Culture01_164_12	Culture01_164	16994	17608	748178981	hypothetical protein, partial [Rhizobium phaseoli]
Culture01_164_16	Culture01_164	20858	23149	499793143	elongation factor Tu [Rhodopseudomonas palustris]_x0001_
Culture01_1682_1	Culture01_1682	3	1169	497485375	ATP-dependent Clp protease ATP-binding protein [Nitrobacter sp. Nb-311A]_x0001_
Culture01_1682_2	Culture01_1682	1428	2033	497485373	50S ribosomal protein L9 [Nitrobacter sp. Nb-311A]_x0001_
Culture01_1682_3	Culture01_1682	2073	3059	497485372	membrane protein [Nitrobacter sp. Nb-311A]_x0001_
Culture01_1682_4	Culture01_1682	3189	3428	499634217	30S ribosomal protein S18 [Nitrobacter winogradskyi]_x0001_
Culture01_1682_5	Culture01_1682	3434	3853	497485370	30S ribosomal protein S6 [Nitrobacter sp. Nb-311A]_x0001_
Culture01_1682_6	Culture01_1682	4225	5184	750393601	ACP S-malonyltransferase [Nitrobacter sp. Nb-311A]
Culture01_1682_7	Culture01_1682	5201	5938	497485368	3-oxoacyl-ACP synthase [Nitrobacter sp. Nb-311A]_x0001_
Culture01_1682_8	Culture01_1682	6213	6452	497485366	acyl carrier protein [Nitrobacter sp. Nb-311A]_x0001_
Culture01_1682_9	Culture01_1682	6548	7813	497485365	3-oxoacyl-ACP synthase [Nitrobacter sp. Nb-311A]_x0001_
Culture01_1682_10	Culture01_1682	7941	9152	497485364	aminodeoxychorismate lyase [Nitrobacter sp. Nb-311A]_x0001_
Culture01_1682_11	Culture01_1682	9393	10280	497485363	hypothetical protein [Nitrobacter sp. Nb-311A]_x0001_
Culture01_1682_12	Culture01_1682	10284	10943	497485362	guanylate kinase [Nitrobacter sp. Nb-311A]_x0001_
Culture01_1682_13	Culture01_1682	11032	11970	750393604	hypothetical protein [Nitrobacter sp. Nb-311A]
Culture01_1682_15	Culture01_1682	13648	14568	499634208	dimethyladenosine transferase [Nitrobacter winogradskyi]_x0001_
Culture01_1682_16	Culture01_1682	14565	15587	750393689	4-hydroxythreonine-4-phosphate dehydrogenase [Nitrobacter sp. Nb-311A]
Culture01_1682_17	Culture01_1682	15672	16631	85696848	hypothetical protein NB311A_19130 [Nitrobacter sp. Nb-311A]
Culture01_1682_18	Culture01_1682	16716	19211	497485357	Organic solvent tolerance protein [Nitrobacter sp. Nb-311A]_x0001_
Culture01_1682_19	Culture01_1682	19211	20308	497485356	permease [Nitrobacter sp. Nb-311A]_x0001_
Culture01_1682_20	Culture01_1682	20305	21477	497485355	permease [Nitrobacter sp. Nb-311A]_x0001_
Culture01_1682_21	Culture01_1682	21835	23337	497485354	aminopeptidase A [Nitrobacter sp. Nb-311A]_x0001_
Culture01_1682_22	Culture01_1682	23334	23786	497485353	DNA polymerase III subunit chi [Nitrobacter sp. Nb-311A]_x0001_
Culture01_1682_23	Culture01_1682	23947	24465	497485352	hypothetical protein [Nitrobacter sp. Nb-311A]_x0001_
Culture01_1682_24	Culture01_1682	24600	26480	497485351	glycosyl transferase family 1 [Nitrobacter sp. Nb-311A]_x0001_
Culture01_1682_26	Culture01_1682	26969	28336	750393606	membrane protein [Nitrobacter sp. Nb-311A]
Culture01_1682_27	Culture01_1682	28436	29053	85696838	alkyl hydroperoxide reductase/ Thiol specific antioxidant/ Malallergen [Nitrobacter sp. Nb-311A]
Culture01_1682_28	Culture01_1682	29348	32983	750393609	hypothetical protein [Nitrobacter sp. Nb-311A]
Culture01_1682_29	Culture01_1682	33054	34307	499830066	tyrosyl-tRNA synthetase [Nitrobacter hamburgensis]_x0001_
Culture01_1682_30	Culture01_1682	34466	35566	499830065	anhydro-N-acetylmuramic acid kinase [Nitrobacter hamburgensis]_x0001_
Culture01_1682_31	Culture01_1682	35678	36325	499634192	alpha/beta hydrolase [Nitrobacter winogradskyi]_x0001_
Culture01_1682_32	Culture01_1682	36523	37683	750393699	cysteine desulfurase [Nitrobacter sp. Nb-311A]
Culture01_1682_33	Culture01_1682	37765	38223	497485341	cysteine desulfarase [Nitrobacter sp. Nb-311A]_x0001_
Culture01_1742_1	Culture01_1742	273	1025	497485629	triosephosphate isomerase [Nitrobacter sp. Nb-311A]_x0001_
Culture01_1742_2	Culture01_1742	1225	1614	497485628	preprotein translocase subunit SecG [Nitrobacter sp. Nb-311A]_x0001_
Culture01_1742_3	Culture01_1742	1781	3412	497485627	CTP synthase [Nitrobacter sp. Nb-311A]_x0001_
Culture01_1742_4	Culture01_1742	3517	3873	85696721	hypothetical protein NB311A_06306 [Nitrobacter sp. Nb-311A]
Culture01_1742_5	Culture01_1742	3926	4876	497485624	2-dehydro-3-deoxyphosphooctonate aldolase [Nitrobacter sp. Nb-311A]_x0001_
Culture01_1742_6	Culture01_1742	4873	6084	497485623	major facilitator transporter [Nitrobacter sp. Nb-311A]_x0001_
Culture01_1742_7	Culture01_1742	6102	6578	499634350	7-cyano-7-deazaguanine reductase [Nitrobacter winogradskyi]_x0001_
Culture01_1742_8	Culture01_1742	6793	8076	499634349	enolase [Nitrobacter winogradskyi]_x0001_
Culture01_1742_9	Culture01_1742	8165	8839	497485619	hypothetical protein [Nitrobacter sp. Nb-311A]_x0001_
Culture01_1742_10	Culture01_1742	9062	10315	499829508	hypothetical protein [Nitrobacter hamburgensis]_x0001_
Culture01_1742_11	Culture01_1742	10331	10918	750393838	methyltransferase [Nitrobacter sp. Nb-311A]
Culture01_1742_12	Culture01_1742	11049	11606	499634343	ACP phosphodiesterase [Nitrobacter winogradskyi]_x0001_
Culture01_1742_13	Culture01_1742	11667	11984	85696712	septum formation initiator [Nitrobacter sp. Nb-311A]
Culture01_1742_14	Culture01_1742	12174	13196	497485615	pyruvate dehydrogenase E1 subunit alpha [Nitrobacter sp. Nb-311A]_x0001_
Culture01_1742_15	Culture01_1742	13223	14644	497485614	dihydrolipoamide acetyltransferase [Nitrobacter sp. Nb-311A]_x0001_
Culture01_1742_16	Culture01_1742	14657	16012	499634339	branched-chain alpha-keto acid dehydrogenase subunit E2 [Nitrobacter winogradskyi]_x0001_
Culture01_1742_17	Culture01_1742	16032	16361	499634338	hypothetical protein [Nitrobacter winogradskyi]_x0001_
Culture01_1742_18	Culture01_1742	16390	17355	499634337	flagellar motor protein MotB [Nitrobacter winogradskyi]_x0001_
Culture01_1742_19	Culture01_1742	17374	18795	499829515	dihydrolipoamide dehydrogenase [Nitrobacter hamburgensis]_x0001_
Culture01_1742_21	Culture01_1742	19508	20272	85696706	sel1-like repeat protein [Nitrobacter sp. Nb-311A]
Culture01_1742_22	Culture01_1742	20337	21137	499829517	exodeoxyribonuclease III [Nitrobacter hamburgensis]_x0001_
Culture01_1742_23	Culture01_1742	21238	21570	497485608	heme biosynthesis protein HemY [Nitrobacter sp. Nb-311A]_x0001_
Culture01_1742_24	Culture01_1742	21681	22895	497485607	deoxyguanosinetriphosphate triphosphohydrolase [Nitrobacter sp. Nb-311A]_x0001_
Culture01_1742_25	Culture01_1742	22934	24727	497485606	arginyl-tRNA synthetase [Nitrobacter sp. Nb-311A]_x0001_
Culture01_1742_26	Culture01_1742	24829	26241	85696701	proline-rich protein [Nitrobacter sp. Nb-311A]
Culture01_1742_27	Culture01_1742	26289	27314	497485604	beta-hexosaminidase [Nitrobacter sp. Nb-311A]_x0001_
Culture01_1742_28	Culture01_1742	27311	28147	499634327	chromosome segregation and condensation protein ScpA [Nitrobacter winogradskyi]_x0001_
Culture01_1742_29	Culture01_1742	28167	28904	497485602	chromosome segregation protein ScpB [Nitrobacter sp. Nb-311A]_x0001_
Culture01_1742_30	Culture01_1742	29263	29613	499829526	DNA gyrase subunit A [Nitrobacter hamburgensis]_x0001_
Culture01_18_1	Culture01_18	1	2415	737099640	hypothetical protein [Devosia riboflavina]_x0001_
Culture01_18_3	Culture01_18	3419	4636	636781056	hypothetical protein [Rhizobium sp. OR191]_x0001_
Culture01_18_4	Culture01_18	4716	6179	640373243	hypothetical protein [Methylosinus sp. LW3]
Culture01_181_1	Culture01_181	3	1247	497482537	adenosylmethionine-8-amino-7-oxononanoate aminotransferase [Nitrobacter sp. Nb-311A]_x0001_
Culture01_181_2	Culture01_181	1244	1885	499634898	dithiobiotin synthetase [Nitrobacter winogradskyi]_x0001_
Culture01_181_3	Culture01_181	1882	3018	85698465	8-amino-7-oxononanoate synthase [Nitrobacter sp. Nb-311A]
Culture01_181_4	Culture01_181	3062	3355	74421477	conserved hypothetical protein [Nitrobacter winogradskyi Nb-255]
Culture01_181_5	Culture01_181	3590	4567	499634901	membrane protein [Nitrobacter winogradskyi]_x0001_
Culture01_181_6	Culture01_181	4619	5602	499634902	quinolinate synthetase [Nitrobacter winogradskyi]_x0001_
Culture01_181_7	Culture01_181	5599	7128	499634903	L-aspartate oxidase [Nitrobacter winogradskyi]_x0001_
Culture01_181_8	Culture01_181	7147	8010	497482529	nicotinate-nucleotide pyrophosphorylase [Nitrobacter sp. Nb-311A]_x0001_
Culture01_181_9	Culture01_181	8158	8418	750391847	hypothetical protein [Nitrobacter sp. Nb-311A]
Culture01_181_10	Culture01_181	9574	10794	497482524	diguanylate cyclase [Nitrobacter sp. Nb-311A]_x0001_
Culture01_181_11	Culture01_181	10908	11807	750391863	RNA polymerase sigma 70 [Nitrobacter sp. Nb-311A]
Culture01_181_12	Culture01_181	12023	13084	85698452	pseudouridine synthase, RluD [Nitrobacter sp. Nb-311A]
Culture01_181_13	Culture01_181	13149	13415	497482521	hypothetical protein [Nitrobacter sp. Nb-311A]_x0001_
Culture01_181_14	Culture01_181	13775	14257	763878887	transcription elongation factor [Bradyrhizobium sp. LTSP849]_x0001_
Culture01_181_15	Culture01_181	14617	14958	85699070	hypothetical protein NB311A_07308 [Nitrobacter sp. Nb-311A]
Culture01_181_17	Culture01_181	15496	15894	499830547	twin-arginine translocation pathway signal [Nitrobacter hamburgensis]_x0001_
Culture01_181_18	Culture01_181	16120	16395	85699067	hypothetical protein NB311A_07293 [Nitrobacter sp. Nb-311A]
Culture01_184_1	Culture01_184	194	1222	750394120	nitrate reductase [Nitrobacter sp. Nb-311A]
Culture01_184_2	Culture01_184	1257	1934	499633358	nitrate reductase [Nitrobacter winogradskyi]_x0001_
Culture01_184_3	Culture01_184	2173	3429	497485981	MFS transporter [Nitrobacter sp. Nb-311A]_x0001_
Culture01_184_4	Culture01_184	3582	4613	750394117	C4-dicarboxylate ABC transporter [Nitrobacter sp. Nb-311A]
Culture01_184_5	Culture01_184	5073	6686	499831465	recombinase [Nitrobacter hamburgensis]_x0001_
Culture01_184_7	Culture01_184	7594	8775	499831464	hypothetical protein [Nitrobacter hamburgensis]_x0001_
Culture01_184_9	Culture01_184	9053	9697	499831462	ATPase [Nitrobacter hamburgensis]_x0001_
Culture01_184_13	Culture01_184	10852	11745	652388981	integrase [Pleomorphomonas koreensis]
Culture01_184_14	Culture01_184	12544	13044	497483972	hypothetical protein [Nitrobacter sp. Nb-311A]_x0001_
Culture01_184_17	Culture01_184	16431	17045	500951010	DNA invertase [Bradyrhizobium sp. ORS 278]_x0001_
Culture01_1896_1	Culture01_1896	1	1026	85695728	resolvase [Nitrobacter sp. Nb-311A]_x0001_
Culture01_1896_3	Culture01_1896	1687	3063	488800619	hypothetical protein [Afipia clevelandensis]_x0001_
Culture01_1896_5	Culture01_1896	3426	4907	91799646	Phage uncharacterized protein-like protein [Nitrobacter hamburgensis X14]
Culture01_1896_7	Culture01_1896	5342	6655	740279770	hypothetical protein [Verrucomicrobia bacterium LP2A]
Culture01_1896_8	Culture01_1896	6667	8328	740279768	peptidase S8, partial [Verrucomicrobia bacterium LP2A]
Culture01_1896_10	Culture01_1896	9179	10294	738592208	hypothetical protein [Novosphingobium sp. AP12]
Culture01_1938_2	Culture01_1938	382	3534	738307733	RND transporter [Methylocapsa aurea]
Culture01_1938_3	Culture01_1938	3537	4649	182635285	efflux transporter, RND family, MFP subunit [Beijerinckia indica subsp. indica ATCC 9039]
Culture01_1938_4	Culture01_1938	5499	6581	499828694	permease [Nitrobacter hamburgensis]_x0001_
Culture01_1938_5	Culture01_1938	6917	8131	499828697	acetate kinase [Nitrobacter hamburgensis]_x0001_
Culture01_1938_6	Culture01_1938	8369	9052	499828701	transcriptional regulator [Nitrobacter hamburgensis]_x0001_
Culture01_1938_7	Culture01_1938	9309	9941	499828702	LuxR family transcriptional regulator [Nitrobacter hamburgensis]_x0001_
Culture01_1938_8	Culture01_1938	10627	12354	499828705	DNA repair protein HhH-GPD [Nitrobacter hamburgensis]_x0001_
Culture01_1938_9	Culture01_1938	12661	13122	750392571	hypothetical protein [Nitrobacter sp. Nb-311A]
Culture01_1938_10	Culture01_1938	13137	13970	91799367	protein of unknown function DUF344 [Nitrobacter hamburgensis X14]
Culture01_1938_11	Culture01_1938	13980	14435	499828708	hypothetical protein [Nitrobacter hamburgensis]_x0001_
Culture01_1938_12	Culture01_1938	15015	15569	499828713	ATPase [Nitrobacter hamburgensis]_x0001_
Culture01_1957_1	Culture01_1957	2	1003	499828984	polysaccharide biosynthesis protein CapD [Nitrobacter hamburgensis]_x0001_
Culture01_1957_2	Culture01_1957	1681	2865	752711635	6-phosphofructokinase [Nitrobacter hamburgensis]
Culture01_1957_3	Culture01_1957	3056	4255	497482543	serine--glyoxylate aminotransferase [Nitrobacter sp. Nb-311A]_x0001_
Culture01_1957_4	Culture01_1957	4573	4842	499634892	signal peptide protein [Nitrobacter winogradskyi]_x0001_
Culture01_1957_6	Culture01_1957	5254	5682	85698470	Histidine triad (HIT) protein [Nitrobacter sp. Nb-311A]
Culture01_1959_2	Culture01_1959	166	2871	497482896	carboxysome shell protein [Nitrobacter sp. Nb-311A]_x0001_
Culture01_1959_3	Culture01_1959	2974	3300	499634498	ribulose bisphosphate carboxylase small chain [Nitrobacter winogradskyi]_x0001_
Culture01_1959_4	Culture01_1959	3373	4794	85698004	methionine sulfoxide reductase A [Nitrobacter sp. Nb-311A]
Culture01_1959_5	Culture01_1959	5040	5708	497482899	LysR family transcriptional regulator [Nitrobacter sp. Nb-311A]_x0001_
Culture01_1962_4	Culture01_1962	1401	2819	499829645	cation transporter [Nitrobacter hamburgensis]_x0001_
Culture01_1962_5	Culture01_1962	2940	4277	654704888	major facilitator transporter [Bradyrhizobium elkanii]
Culture01_200_2	Culture01_200	610	1101	497484139	hypothetical protein [Nitrobacter sp. Nb-311A]_x0001_
Culture01_200_3	Culture01_200	1281	1844	85699403	Flp pilus assembly protein TadG [Nitrobacter sp. Nb-311A]
Culture01_200_4	Culture01_200	2059	2607	497484137	pilus assembly protein TadG [Nitrobacter sp. Nb-311A]_x0001_
Culture01_200_5	Culture01_200	2709	2915	74419379	cold-shock DNA-binding protein family [Nitrobacter winogradskyi Nb-255]_x0001_
Culture01_200_6	Culture01_200	3176	3457	499632910	translation initiation factor IF-1 [Nitrobacter winogradskyi]_x0001_
Culture01_200_7	Culture01_200	3722	5158	497484134	RNA helicase [Nitrobacter sp. Nb-311A]_x0001_
Culture01_200_8	Culture01_200	5504	6271	499632913	pseudouridine synthase [Nitrobacter winogradskyi]_x0001_
Culture01_200_9	Culture01_200	6384	7331	497484132	cell division protein FtsY [Nitrobacter sp. Nb-311A]_x0001_
Culture01_200_10	Culture01_200	7429	8031	499632915	septation protein A [Nitrobacter winogradskyi]
Culture01_200_11	Culture01_200	8084	8446	499828266	hypothetical protein [Nitrobacter hamburgensis]_x0001_
Culture01_200_12	Culture01_200	8583	9176	750392775	thiol:disulfide interchange protein [Nitrobacter sp. Nb-311A]
Culture01_200_14	Culture01_200	9358	10089	497484128	Cytochrome c-type biogenesis protein CcmC [Nitrobacter sp. Nb-311A]_x0001_
Culture01_200_15	Culture01_200	10184	10852	497484127	heme ABC transporter permease [Nitrobacter sp. Nb-311A]_x0001_
Culture01_2011_1	Culture01_2011	540	1739	640479042	MULTISPECIES: hypothetical protein [Afipia]
Culture01_2011_7	Culture01_2011	3587	4006	497482454	Cro/Cl family transcriptional regulator [Nitrobacter sp. Nb-311A]_x0001_
Culture01_2042_2	Culture01_2042	374	727	91799301	conserved hypothetical protein [Nitrobacter hamburgensis X14]
Culture01_2042_3	Culture01_2042	724	1221	499828642	hypothetical protein [Nitrobacter hamburgensis]_x0001_
Culture01_2042_4	Culture01_2042	1211	2731	499828641	resolvase-like protein [Nitrobacter hamburgensis]_x0001_
Culture01_2042_5	Culture01_2042	2959	4290	498203065	hypothetical protein [Komagataeibacter oboediens]
Culture01_2042_6	Culture01_2042	4482	5639	498203063	RNA-directed DNA polymerase [Komagataeibacter oboediens]
Culture01_2042_7	Culture01_2042	5651	6352	739661285	hypothetical protein [Sphingobium yanoikuyae]_x0001_
Culture01_2042_8	Culture01_2042	6660	8660	654276811	DNA helicase UvrD [Burkholderia cepacia]
Culture01_2042_9	Culture01_2042	8664	10733	657368284	ATP-dependent OLD family endonuclease, partial [Medicago truncatula]
Culture01_2042_10	Culture01_2042	11339	11710	91799287	3-demethylubiquinone-9 3-methyltransferase [Nitrobacter hamburgensis X14]
Culture01_2042_11	Culture01_2042	12553	14337	499828629	acyl-CoA dehydrogenase [Nitrobacter hamburgensis]_x0001_
Culture01_2042_12	Culture01_2042	14367	15125	85695652	enoyl-CoA hydratase/isomerase [Nitrobacter sp. Nb-311A]
Culture01_2042_13	Culture01_2042	15316	16245	497483919	acetoin utilization protein [Nitrobacter sp. Nb-311A]_x0001_
Culture01_2042_14	Culture01_2042	16312	16563	497483918	exodeoxyribonuclease VII small subunit [Nitrobacter sp. Nb-311A]_x0001_
Culture01_2042_15	Culture01_2042	17060	18988	497483917	1-deoxy-D-xylulose-5-phosphate synthase [Nitrobacter sp. Nb-311A]_x0001_
Culture01_2042_16	Culture01_2042	19186	19941	497483916	hemolysin [Nitrobacter sp. Nb-311A]_x0001_
Culture01_2042_17	Culture01_2042	19925	21196	85695647	possible hypothetical RNA methyltransferase [Nitrobacter sp. Nb-311A]
Culture01_2042_18	Culture01_2042	21334	22392	653495932	MULTISPECIES: SAM-dependent methyltransferase [Bradyrhizobium]
Culture01_2042_19	Culture01_2042	22531	23553	497484166	chorismate synthase [Nitrobacter sp. Nb-311A]_x0001_
Culture01_2046_1	Culture01_2046	1	507	85696497	Glu/Leu/Phe/Val dehydrogenase [Nitrobacter sp. Nb-311A]
Culture01_2046_2	Culture01_2046	774	1994	497485847	FAD-dependent pyridine nucleotide-disulfide oxidoreductase [Nitrobacter sp. Nb-311A]_x0001_
Culture01_2046_3	Culture01_2046	2219	3493	499830415	beta-lactamase [Nitrobacter hamburgensis]_x0001_
Culture01_2046_4	Culture01_2046	3522	4412	499634776	citrate lyase [Nitrobacter winogradskyi]_x0001_
Culture01_2046_5	Culture01_2046	4409	4861	497485845	MaoC family dehydratase [Nitrobacter sp. Nb-311A]_x0001_
Culture01_2046_6	Culture01_2046	5100	6038	750429632	hypothetical protein [Paenibacillus curdlanolyticus]
Culture01_2046_7	Culture01_2046	6035	6853	499760221	hypothetical protein [Rhodopseudomonas palustris]_x0001_
Culture01_2046_8	Culture01_2046	6882	7448	499760220	hypothetical protein [Rhodopseudomonas palustris]_x0001_
Culture01_2046_10	Culture01_2046	8551	11016	74420400	TonB-dependent siderophore receptor [Nitrobacter winogradskyi Nb-255]
Culture01_2046_11	Culture01_2046	11129	12091	74419791	FecR protein [Nitrobacter winogradskyi Nb-255]
Culture01_2046_12	Culture01_2046	12203	12703	489709677	fec I [Methylosinus trichosporium]
Culture01_2046_13	Culture01_2046	13026	13817	499830647	molybdenum-pterin-binding protein [Nitrobacter hamburgensis]_x0001_
Culture01_2046_14	Culture01_2046	13960	14793	499633519	molybdenum storage protein subunit alpha [Nitrobacter winogradskyi]_x0001_
Culture01_2046_15	Culture01_2046	14806	15615	499830649	uridine monophosphate kinase [Nitrobacter hamburgensis]_x0001_
Culture01_2046_16	Culture01_2046	16113	16817	657882733	methyltransferase [Bradyrhizobium sp. URHD0069]
Culture01_2046_17	Culture01_2046	16827	17723	85696389	phosphatidylserine decarboxylase [Nitrobacter sp. Nb-311A]
Culture01_2046_18	Culture01_2046	17728	19428	499633286	glutamate-1-semialdehyde 2,1-aminomutase [Nitrobacter winogradskyi]_x0001_
Culture01_2046_19	Culture01_2046	19458	20087	499633285	membrane protein [Nitrobacter winogradskyi]_x0001_
Culture01_2046_20	Culture01_2046	20207	20896	499633284	SAM-dependent methlyltransferase [Nitrobacter winogradskyi]_x0001_
Culture01_2046_21	Culture01_2046	20927	21982	85696385	glycosyl transferase, group 1 [Nitrobacter sp. Nb-311A]
Culture01_2046_23	Culture01_2046	22614	23432	91799214	protein of unknown function DUF155 [Nitrobacter hamburgensis X14]
Culture01_2052_3	Culture01_2052	1205	1801	738080219	hypothetical protein [Bradyrhizobium yuanmingense]
Culture01_2052_4	Culture01_2052	1954	2508	497482193	alkyl hydroperoxide reductase [Nitrobacter sp. Nb-311A]_x0001_
Culture01_2052_9	Culture01_2052	7047	9341	515298260	hypothetical protein [Bradyrhizobium elkanii]
Culture01_2052_10	Culture01_2052	9427	10038	738094798	hypothetical protein [Bradyrhizobium sp. URHD0069]
Culture01_2052_11	Culture01_2052	10473	11480	764967914	MULTISPECIES: hypothetical protein [Bradyrhizobium]_x0001_
Culture01_2052_12	Culture01_2052	11728	13641	760868694	hypothetical 65.5 kDa protein y4IJ [Methylobacterium aquaticum]
Culture01_2052_13	Culture01_2052	13900	15201	760868692	cytochrome P450 [Methylobacterium aquaticum]
Culture01_2052_14	Culture01_2052	15293	15901	500168086	hypothetical protein [Rhodobacter sphaeroides]_x0001_
Culture01_2052_15	Culture01_2052	16123	18966	738335725	oxygenase [Methylosinus sp. PW1]
Culture01_2052_16	Culture01_2052	19852	20640	91800592	nodulate formation efficiency C protein [Nitrobacter hamburgensis X14]
Culture01_2052_17	Culture01_2052	21045	21359	752710978	hypothetical protein [Nitrobacter hamburgensis]
Culture01_2052_20	Culture01_2052	22596	23042	497482562	NUDIX family protein [Nitrobacter sp. Nb-311A]_x0001_
Culture01_2061_1	Culture01_2061	3	272	499831050	hypothetical protein [Nitrobacter hamburgensis]_x0001_
Culture01_2061_2	Culture01_2061	294	1157	499831049	membrane protein [Nitrobacter hamburgensis]_x0001_
Culture01_2061_3	Culture01_2061	1160	1657	499831048	membrane protein [Nitrobacter hamburgensis]_x0001_
Culture01_2061_4	Culture01_2061	1828	2838	497483555	hypothetical protein [Nitrobacter sp. Nb-311A]_x0001_
Culture01_2061_5	Culture01_2061	2997	4256	627784931	hypothetical protein BJS_01533 [Bradyrhizobium japonicum SEMIA 5079]
Culture01_2061_6	Culture01_2061	4565	6724	497483556	TonB-dependent receptor [Nitrobacter sp. Nb-311A]_x0001_
Culture01_2061_7	Culture01_2061	6943	7482	85697313	hypothetical protein NB311A_16909 [Nitrobacter sp. Nb-311A]
Culture01_2061_8	Culture01_2061	7640	8491	497483558	cytochrome C peroxidase [Nitrobacter sp. Nb-311A]_x0001_
Culture01_2061_9	Culture01_2061	8630	9067	497483559	hypothetical protein [Nitrobacter sp. Nb-311A]_x0001_
Culture01_2061_11	Culture01_2061	9463	11016	497483560	hypothetical protein [Nitrobacter sp. Nb-311A]_x0001_
Culture01_2061_12	Culture01_2061	11241	14051	74420009	maltooligosyl trehalose synthase [Nitrobacter winogradskyi Nb-255]
Culture01_2061_14	Culture01_2061	14381	15928	91802455	signal transduction histidine kinase [Nitrobacter hamburgensis X14]
Culture01_2061_17	Culture01_2061	17168	18007	500993526	glutamine amidotransferase [Bradyrhizobium sp. BTAi1]_x0001_
Culture01_2061_18	Culture01_2061	18034	18567	505483387	putative asparagine synthetase [Bradyrhizobium oligotrophicum]_x0001_
Culture01_2061_19	Culture01_2061	18628	19860	653519370	carboxylate--amine ligase [Bradyrhizobium sp. URHA0013]
Culture01_2061_20	Culture01_2061	20014	20865	497483564	hypothetical protein [Nitrobacter sp. Nb-311A]_x0001_
Culture01_2061_21	Culture01_2061	20923	21945	85697321	hypothetical protein NB311A_16949 [Nitrobacter sp. Nb-311A]
Culture01_2061_22	Culture01_2061	21999	22460	497483566	glycerol-3-phosphate cytidiltransferase [Nitrobacter sp. Nb-311A]_x0001_
Culture01_2061_23	Culture01_2061	22457	23554	497483567	hypothetical protein [Nitrobacter sp. Nb-311A]_x0001_
Culture01_2061_24	Culture01_2061	23707	25020	497483568	putative glycosyltransferase, forming alpha glycosyl linkages protein [Nitrobacter sp. Nb-311A]_x0001_
Culture01_2061_25	Culture01_2061	25017	26558	497483569	putative bifunctional glycosyltransferase, forming alpha-glycosyland beta-glycosyl linkages protein [Nitrobacter sp. Nb-311A]_x0001_
Culture01_2061_26	Culture01_2061	26576	27100	85697326	Putative glycosyl transferase [Nitrobacter sp. Nb-311A]
Culture01_2061_27	Culture01_2061	27580	28713	499633520	para-aminobenzoate synthase [Nitrobacter winogradskyi]_x0001_
Culture01_2065_1	Culture01_2065	2	1057	85698198	oxidoreductase [Nitrobacter sp. Nb-311A]
Culture01_2065_2	Culture01_2065	1074	2222	750393414	aminotransferase DegT [Nitrobacter sp. Nb-311A]
Culture01_2065_3	Culture01_2065	2266	3792	499633640	multidrug transporter MurJ [Nitrobacter winogradskyi]_x0001_
Culture01_2065_4	Culture01_2065	3881	6172	85698201	aldehyde oxidase and xanthine dehydrogenase [Nitrobacter sp. Nb-311A]
Culture01_2065_5	Culture01_2065	6192	6617	499829091	hypothetical protein [Nitrobacter hamburgensis]_x0001_
Culture01_2065_6	Culture01_2065	6697	6942	499829092	AsnC family transcriptional regulator [Nitrobacter hamburgensis]_x0001_
Culture01_2065_7	Culture01_2065	7115	7921	74420145	phosphomethylpyrimidine kinase / hydroxymethylpyrimidine kinase [Nitrobacter winogradskyi Nb-255]
Culture01_2065_8	Culture01_2065	7985	8797	499829094	ser/threonine protein phosphatase [Nitrobacter hamburgensis]_x0001_
Culture01_2065_9	Culture01_2065	8798	9847	497485097	GDP-mannose-dependent alpha-mannosyltransferase [Nitrobacter sp. Nb-311A]_x0001_
Culture01_2065_10	Culture01_2065	9878	10969	497485098	hypothetical protein [Nitrobacter sp. Nb-311A]_x0001_
Culture01_2065_11	Culture01_2065	11161	12156	74420148	mandelate racemase/muconate lactonizing enzyme [Nitrobacter winogradskyi Nb-255]
Culture01_2065_12	Culture01_2065	12543	17798	646806457	negative regulator of septation ring formation [Bradyrhizobium sp. JGI 0001002-A22]
Culture01_2065_13	Culture01_2065	18174	18551	752697243	histidine kinase [Nitrobacter winogradskyi]
Culture01_2065_14	Culture01_2065	18676	18996	499633650	2Fe-2S ferredoxin [Nitrobacter winogradskyi]_x0001_
Culture01_2065_15	Culture01_2065	19228	20256	85698213	FAD-dependent pyridine nucleotide-disulphide oxidoreductase [Nitrobacter sp. Nb-311A]
Culture01_2065_16	Culture01_2065	20407	20997	496255427	heme oxygenase [Bradyrhizobium sp. STM 3843]_x0001_
Culture01_2065_17	Culture01_2065	20994	23531	640609789	chemotaxis protein CheY [Bradyrhizobium sp. DOA9]_x0001_
Culture01_2065_18	Culture01_2065	23532	25580	497485108	signal peptide protein [Nitrobacter sp. Nb-311A]_x0001_
Culture01_2065_19	Culture01_2065	25638	26753	497485109	membrane protein [Nitrobacter sp. Nb-311A]_x0001_
Culture01_2065_20	Culture01_2065	27443	27877	497485110	hypothetical protein [Nitrobacter sp. Nb-311A]_x0001_
Culture01_2148_1	Culture01_2148	1	1092	497483450	acetyltransferase [Nitrobacter sp. Nb-311A]_x0001_
Culture01_2148_2	Culture01_2148	1398	1901	85697447	hypothetical protein NB311A_13456 [Nitrobacter sp. Nb-311A]
Culture01_223_1	Culture01_223	3	2042	497484690	membrane protein [Nitrobacter sp. Nb-311A]_x0001_
Culture01_223_2	Culture01_223	2201	2644	499830912	hypothetical protein [Nitrobacter hamburgensis]_x0001_
Culture01_223_3	Culture01_223	2763	5099	499830913	TonB-denpendent receptor [Nitrobacter hamburgensis]_x0001_
Culture01_223_4	Culture01_223	5157	5759	497484693	N-acetyltransferase GCN5 [Nitrobacter sp. Nb-311A]_x0001_
Culture01_223_5	Culture01_223	5756	6163	497484694	NUDIX hydrolase [Nitrobacter sp. Nb-311A]_x0001_
Culture01_223_7	Culture01_223	6482	7387	499635103	metallophosphoesterase [Nitrobacter winogradskyi]_x0001_
Culture01_223_8	Culture01_223	7406	7759	499635104	membrane protein [Nitrobacter winogradskyi]_x0001_
Culture01_223_9	Culture01_223	7878	8135	497484697	glutathione peroxidase [Nitrobacter sp. Nb-311A]_x0001_
Culture01_223_10	Culture01_223	8132	8608	497484698	glutathione peroxidase [Nitrobacter sp. Nb-311A]_x0001_
Culture01_223_11	Culture01_223	8657	8914	85698741	hypothetical protein NB311A_15122 [Nitrobacter sp. Nb-311A]
Culture01_223_12	Culture01_223	9197	12049	497484700	phosoglucose isomerase [Nitrobacter sp. Nb-311A]_x0001_
Culture01_223_13	Culture01_223	12282	13295	750393111	6-phosphogluconate dehydrogenase [Nitrobacter sp. Nb-311A]
Culture01_223_14	Culture01_223	13292	14809	497484703	glucose-6-phosphate 1-dehydrogenase [Nitrobacter sp. Nb-311A]_x0001_
Culture01_223_15	Culture01_223	14806	15549	85698746	6-phosphogluconolactonase [Nitrobacter sp. Nb-311A]
Culture01_223_16	Culture01_223	15546	16082	497484705	carbohydrate kinase [Nitrobacter sp. Nb-311A]_x0001_
Culture01_223_17	Culture01_223	16079	16882	499830928	COF family hydrolase [Nitrobacter hamburgensis]_x0001_
Culture01_223_18	Culture01_223	16886	18754	497484707	glucoamylase [Nitrobacter sp. Nb-311A]_x0001_
Culture01_223_19	Culture01_223	18993	20843	85698750	PAS sensor diguanylate cyclase/phophodiesterase [Nitrobacter sp. Nb-311A]
Culture01_223_20	Culture01_223	21278	22228	497484709	nitrite reductase [Nitrobacter sp. Nb-311A]_x0001_
Culture01_223_21	Culture01_223	22275	22631	499635118	cytochrome C [Nitrobacter winogradskyi]_x0001_
Culture01_223_22	Culture01_223	22631	23308	497484711	cytochrome C [Nitrobacter sp. Nb-311A]_x0001_
Culture01_223_23	Culture01_223	23332	24408	499635120	multicopper oxidase [Nitrobacter winogradskyi]_x0001_
Culture01_223_24	Culture01_223	24699	25373	497484713	cytochrome C biogenesis protein [Nitrobacter sp. Nb-311A]_x0001_
Culture01_223_25	Culture01_223	25606	26034	85698756	hypothetical protein NB311A_15197 [Nitrobacter sp. Nb-311A]
Culture01_223_26	Culture01_223	26261	29194	499635123	cation:proton antiporter [Nitrobacter winogradskyi]_x0001_
Culture01_223_27	Culture01_223	29194	29532	499635124	cation:proton antiporter [Nitrobacter winogradskyi]_x0001_
Culture01_223_28	Culture01_223	29535	31142	497484718	cation:proton antiporter [Nitrobacter sp. Nb-311A]_x0001_
Culture01_223_29	Culture01_223	31139	31627	499828818	cation:proton antiporter [Nitrobacter hamburgensis]_x0001_
Culture01_223_30	Culture01_223	31624	31902	499635127	cation:proton antiporter [Nitrobacter winogradskyi]_x0001_
Culture01_223_31	Culture01_223	31899	32303	499635128	potassium:proton antiporter [Nitrobacter winogradskyi]_x0001_
Culture01_223_34	Culture01_223	32832	33920	497484727	iron ABC transporter permease [Nitrobacter sp. Nb-311A]_x0001_
Culture01_223_35	Culture01_223	33910	36372	497484728	ABC transporter permease [Nitrobacter sp. Nb-311A]_x0001_
Culture01_223_36	Culture01_223	36369	37022	497484729	ABC transporter ATP-binding protein [Nitrobacter sp. Nb-311A]_x0001_
Culture01_223_37	Culture01_223	37198	37689	497484730	pyridoxamine 5'-phosphate oxidase [Nitrobacter sp. Nb-311A]_x0001_
Culture01_223_39	Culture01_223	38244	39449	497484731	hypothetical protein [Nitrobacter sp. Nb-311A]_x0001_
Culture01_223_40	Culture01_223	39453	41453	497484732	hypothetical protein [Nitrobacter sp. Nb-311A]_x0001_
Culture01_223_42	Culture01_223	42471	43724	750393275	MFS transporter [Nitrobacter sp. Nb-311A]
Culture01_223_43	Culture01_223	44162	44521	85698777	hypothetical protein NB311A_15302 [Nitrobacter sp. Nb-311A]
Culture01_223_45	Culture01_223	44909	45532	497484736	chalcone synthase [Nitrobacter sp. Nb-311A]_x0001_
Culture01_224_1	Culture01_224	2	1771	85697195	hypothetical protein NB311A_14310 [Nitrobacter sp. Nb-311A]
Culture01_224_2	Culture01_224	1815	2585	497484538	trans-aconitate 2-methyltransferase [Nitrobacter sp. Nb-311A]_x0001_
Culture01_224_3	Culture01_224	2704	3291	750393063	hypothetical protein [Nitrobacter sp. Nb-311A]
Culture01_224_4	Culture01_224	3293	4552	85697192	lytic murein transglycosylase [Nitrobacter sp. Nb-311A]
Culture01_224_5	Culture01_224	4622	4924	499634950	hypothetical protein [Nitrobacter winogradskyi]_x0001_
Culture01_224_6	Culture01_224	5125	5439	750393060	hypothetical protein [Nitrobacter sp. Nb-311A]
Culture01_224_7	Culture01_224	6134	6616	497484532	bacterioferritin [Nitrobacter sp. Nb-311A]_x0001_
Culture01_224_8	Culture01_224	6786	8879	497484531	peptidase S9 [Nitrobacter sp. Nb-311A]_x0001_
Culture01_224_9	Culture01_224	9041	9295	497484530	Fis family transcriptional regulator [Nitrobacter sp. Nb-311A]_x0001_
Culture01_224_10	Culture01_224	9692	10126	497484528	hypothetical protein [Nitrobacter sp. Nb-311A]_x0001_
Culture01_224_11	Culture01_224	10153	11100	497484527	hypothetical protein [Nitrobacter sp. Nb-311A]_x0001_
Culture01_224_12	Culture01_224	11378	13273	497484525	phosphomethylpyrimidine synthase [Nitrobacter sp. Nb-311A]_x0001_
Culture01_224_13	Culture01_224	13344	13952	74421521	thiamine-phosphate diphosphorylase [Nitrobacter winogradskyi Nb-255]
Culture01_224_14	Culture01_224	13939	14721	499634940	thiazole synthase [Nitrobacter winogradskyi]_x0001_
Culture01_224_16	Culture01_224	14967	15983	499634938	glycine oxidase [Nitrobacter winogradskyi]_x0001_
Culture01_224_17	Culture01_224	16314	16697	499830588	lytic transglycosylase [Nitrobacter hamburgensis]_x0001_
Culture01_224_19	Culture01_224	17532	18041	497484516	photosystem reaction center subunit H [Nitrobacter sp. Nb-311A]_x0001_
Culture01_224_20	Culture01_224	18167	19723	497484515	hypothetical protein [Nitrobacter sp. Nb-311A]_x0001_
Culture01_224_21	Culture01_224	20035	21222	497484513	extensin [Nitrobacter sp. Nb-311A]_x0001_
Culture01_224_23	Culture01_224	22244	22555	74421510	conserved hypothetical protein [Nitrobacter winogradskyi Nb-255]
Culture01_224_24	Culture01_224	22747	23427	499634929	cobyrinic acid a,c-diamide synthase [Nitrobacter winogradskyi]_x0001_
Culture01_224_25	Culture01_224	23588	24481	497484509	LysR family transcriptional regulator [Nitrobacter sp. Nb-311A]_x0001_
Culture01_224_26	Culture01_224	24499	25464	85697164	thioredoxin reductase [Nitrobacter sp. Nb-311A]
Culture01_224_27	Culture01_224	25723	26208	497484507	ArsR family transcriptional regulator [Nitrobacter sp. Nb-311A]_x0001_
Culture01_224_28	Culture01_224	26223	26621	497484506	hypothetical protein [Nitrobacter sp. Nb-311A]_x0001_
Culture01_224_29	Culture01_224	27127	27603	499634924	transcription elongation factor GreA [Nitrobacter winogradskyi]_x0001_
Culture01_224_30	Culture01_224	27953	31417	497484503	carbamoyl phosphate synthase large subunit [Nitrobacter sp. Nb-311A]_x0001_
Culture01_224_31	Culture01_224	31701	32132	499830572	hypothetical protein [Nitrobacter hamburgensis]_x0001_
Culture01_224_32	Culture01_224	32946	33482	499634921	DNA-binding protein [Nitrobacter winogradskyi]_x0001_
Culture01_224_33	Culture01_224	33527	34660	499830569	carbamoyl phosphate synthase small subunit [Nitrobacter hamburgensis]_x0001_
Culture01_224_34	Culture01_224	34899	35351	499830568	aspartyl-tRNA amidotransferase subunit B [Nitrobacter hamburgensis]_x0001_
Culture01_224_36	Culture01_224	36051	36599	497484495	hypothetical protein [Nitrobacter sp. Nb-311A]_x0001_
Culture01_224_37	Culture01_224	36745	38649	497484494	DNA primase [Nitrobacter sp. Nb-311A]_x0001_
Culture01_224_38	Culture01_224	39322	41475	497484492	RNA polymerase sigma factor RpoD [Nitrobacter sp. Nb-311A]_x0001_
Culture01_224_39	Culture01_224	41529	42119	499830563	hypothetical protein [Nitrobacter hamburgensis]_x0001_
Culture01_224_40	Culture01_224	42307	42924	499634913	hypothetical protein [Nitrobacter winogradskyi]_x0001_
Culture01_224_41	Culture01_224	43828	44646	497484490	lytic transglycosylase [Nitrobacter sp. Nb-311A]_x0001_
Culture01_224_42	Culture01_224	44718	45599	497484489	membrane protein [Nitrobacter sp. Nb-311A]_x0001_
Culture01_226_2	Culture01_226	244	837	497484167	phosphoglycerate kinase [Nitrobacter sp. Nb-311A]_x0001_
Culture01_226_4	Culture01_226	1454	2179	750392786	LuxR family transcriptional regulator [Nitrobacter sp. Nb-311A]
Culture01_226_5	Culture01_226	2257	2889	85699434	Autoinducer synthesis protein [Nitrobacter sp. Nb-311A]
Culture01_226_7	Culture01_226	3378	4334	499633217	molecular chaperone DnaJ [Nitrobacter winogradskyi]_x0001_
Culture01_226_8	Culture01_226	4456	4812	85699437	hypothetical protein NB311A_03314 [Nitrobacter sp. Nb-311A]
Culture01_226_9	Culture01_226	4977	5618	499828614	pyridoxamine 5'-phosphate oxidase [Nitrobacter hamburgensis]_x0001_
Culture01_226_10	Culture01_226	5615	6406	497484174	oxidoreductase [Nitrobacter sp. Nb-311A]_x0001_
Culture01_226_11	Culture01_226	6888	7868	497484176	magnesium transporter [Nitrobacter sp. Nb-311A]_x0001_
Culture01_226_12	Culture01_226	8349	9014	497484177	hypothetical protein [Nitrobacter sp. Nb-311A]_x0001_
Culture01_226_13	Culture01_226	9212	10204	497484178	extensin [Nitrobacter sp. Nb-311A]_x0001_
Culture01_226_14	Culture01_226	10393	12021	497484179	long-chain fatty acid--CoA ligase [Nitrobacter sp. Nb-311A]_x0001_
Culture01_226_15	Culture01_226	12101	12742	491552278	amidase [Stenotrophomonas maltophilia]_x0001_
Culture01_226_16	Culture01_226	12877	13758	750392917	quercetin 2,3-dioxygenase [Nitrobacter sp. Nb-311A]
Culture01_226_17	Culture01_226	13875	14813	85699446	Trancriptional regulatory protein, LysR family protein [Nitrobacter sp. Nb-311A]
Culture01_226_18	Culture01_226	14855	15709	497484182	hypothetical protein [Nitrobacter sp. Nb-311A]_x0001_
Culture01_226_19	Culture01_226	15713	16630	497484183	beta-lactamase [Nitrobacter sp. Nb-311A]_x0001_
Culture01_226_20	Culture01_226	16867	18081	499828603	acyl-CoA dehydrogenase [Nitrobacter hamburgensis]_x0001_
Culture01_226_21	Culture01_226	18166	19242	499633200	3,4-dihydroxy-2-butanone 4-phosphate synthase [Nitrobacter winogradskyi]_x0001_
Culture01_226_22	Culture01_226	19380	21107	499633199	membrane protein [Nitrobacter winogradskyi]_x0001_
Culture01_226_23	Culture01_226	21881	22519	497484189	SAM-dependent methlyltransferase [Nitrobacter sp. Nb-311A]_x0001_
Culture01_226_24	Culture01_226	22541	23743	85699455	tRNA (5-methylaminomethyl-2-thiouridylate)-methyltransferase [Nitrobacter sp. Nb-311A]
Culture01_226_25	Culture01_226	24071	25627	497484191	flagellar hook-length control protein [Nitrobacter sp. Nb-311A]_x0001_
Culture01_226_26	Culture01_226	25639	26331	497484192	flagellar hook capping protein FlgD [Nitrobacter sp. Nb-311A]_x0001_
Culture01_226_27	Culture01_226	26513	26788	488802232	MULTISPECIES: hypothetical protein [Bradyrhizobiaceae]_x0001_
Culture01_226_28	Culture01_226	26961	28583	497484193	flagellar M-ring protein FliF [Nitrobacter sp. Nb-311A]_x0001_
Culture01_226_29	Culture01_226	28590	29681	499633192	flagellar motor switch protein FliG [Nitrobacter winogradskyi]_x0001_
Culture01_226_30	Culture01_226	29681	30310	497484195	flagellar assembly protein FliH [Nitrobacter sp. Nb-311A]_x0001_
Culture01_226_31	Culture01_226	30325	30675	497484196	flagellar motor switch protein FliN [Nitrobacter sp. Nb-311A]_x0001_
Culture01_226_32	Culture01_226	30719	32098	497484197	ATPase AAA [Nitrobacter sp. Nb-311A]_x0001_
Culture01_226_33	Culture01_226	32208	33317	499828543	ATP-binding protein [Nitrobacter hamburgensis]_x0001_
Culture01_226_34	Culture01_226	33606	33992	499633187	hypothetical protein [Nitrobacter winogradskyi]_x0001_
Culture01_226_35	Culture01_226	34094	35278	499633186	cystathionine gamma-synthase [Nitrobacter winogradskyi]_x0001_
Culture01_226_36	Culture01_226	35498	37228	750392929	sulfite reductase [Nitrobacter sp. Nb-311A]
Culture01_226_37	Culture01_226	37239	39071	497484202	sulfite reductase subunit alpha [Nitrobacter sp. Nb-311A]_x0001_
Culture01_226_38	Culture01_226	39595	42231	499828538	ATPase AAA [Nitrobacter hamburgensis]_x0001_
Culture01_226_39	Culture01_226	42393	43235	91799192	conserved hypothetical protein [Nitrobacter hamburgensis X14]
Culture01_226_40	Culture01_226	43401	44009	499633181	amidase [Nitrobacter winogradskyi]_x0001_
Culture01_226_41	Culture01_226	44401	45090	74419654	methionine biosynthesis MetW [Nitrobacter winogradskyi Nb-255]
Culture01_226_42	Culture01_226	45092	45826	85699474	homoserine O-acetyltransferase [Nitrobacter sp. Nb-311A]
Culture01_2330_1	Culture01_2330	2	385	765025554	integrase [Bradyrhizobium sp. LTSPM299]_x0001_
Culture01_2330_5	Culture01_2330	1408	1668	85697867	hypothetical protein NB311A_04973 [Nitrobacter sp. Nb-311A]
Culture01_2330_6	Culture01_2330	1902	2234	750392027	hypothetical protein [Nitrobacter sp. Nb-311A]
Culture01_2330_8	Culture01_2330	2891	3418	497483023	hypothetical protein [Nitrobacter sp. Nb-311A]_x0001_
Culture01_2330_14	Culture01_2330	5942	6649	497482793	hypothetical protein [Nitrobacter sp. Nb-311A]_x0001_
Culture01_2352_3	Culture01_2352	1078	1542	503265754	MULTISPECIES: hypothetical protein [Bradyrhizobiaceae]_x0001_
Culture01_2352_4	Culture01_2352	1543	2742	492875221	MULTISPECIES: hypothetical protein [Bradyrhizobiaceae]_x0001_
Culture01_2352_5	Culture01_2352	2739	3758	492875222	MULTISPECIES: patatin [Bradyrhizobiaceae]_x0001_
Culture01_2352_6	Culture01_2352	3764	3988	492875223	MULTISPECIES: hypothetical protein [Bradyrhizobiaceae]_x0001_
Culture01_2352_8	Culture01_2352	4442	5323	492875226	MULTISPECIES: hypothetical protein [Bradyrhizobiaceae]_x0001_
Culture01_2352_9	Culture01_2352	5868	6437	492876087	hypothetical protein [Afipia broomeae]_x0001_
Culture01_2352_10	Culture01_2352	7436	9379	488800620	terminase [Afipia clevelandensis]_x0001_
Culture01_2352_11	Culture01_2352	9758	11215	488800619	hypothetical protein [Afipia clevelandensis]_x0001_
Culture01_2352_13	Culture01_2352	12153	13196	85696447	NAD-dependent epimerase/dehydratase [Nitrobacter sp. Nb-311A]
Culture01_2352_14	Culture01_2352	13240	14574	85696446	hypothetical protein NB311A_13821 [Nitrobacter sp. Nb-311A]
Culture01_2352_16	Culture01_2352	15205	15897	85695728	resolvase [Nitrobacter sp. Nb-311A]_x0001_
Culture01_2362_1	Culture01_2362	1	1062	497484340	malate--CoA ligase subunit beta [Nitrobacter sp. Nb-311A]_x0001_
Culture01_2362_3	Culture01_2362	1561	2445	497484341	succinyl-CoA synthetase subsunit alpha [Nitrobacter sp. Nb-311A]_x0001_
Culture01_2362_4	Culture01_2362	2595	5552	497484342	MFS transporter [Nitrobacter sp. Nb-311A]_x0001_
Culture01_2362_5	Culture01_2362	5663	6949	497484343	dihydrolipoamide succinyltransferase [Nitrobacter sp. Nb-311A]_x0001_
Culture01_2362_6	Culture01_2362	6969	7469	499828400	hypothetical protein [Nitrobacter hamburgensis]_x0001_
Culture01_2362_7	Culture01_2362	7480	8883	91799052	dihydrolipoamide dehydrogenase [Nitrobacter hamburgensis X14]
Culture01_2362_8	Culture01_2362	8916	9881	85699615	phage integrase [Nitrobacter sp. Nb-311A]
Culture01_2362_9	Culture01_2362	10147	12357	497484348	primosome assembly protein PriA [Nitrobacter sp. Nb-311A]_x0001_
Culture01_2362_10	Culture01_2362	12563	12826	499633025	rare lipoprotein A [Nitrobacter winogradskyi]_x0001_
Culture01_2362_11	Culture01_2362	13723	14283	499633026	F0F1 ATP synthase subunit delta [Nitrobacter winogradskyi]_x0001_
Culture01_2362_12	Culture01_2362	14283	15815	497484352	F0F1 ATP synthase subunit alpha [Nitrobacter sp. Nb-311A]_x0001_
Culture01_2362_13	Culture01_2362	15961	16839	497484353	F0F1 ATP synthase subunit gamma [Nitrobacter sp. Nb-311A]_x0001_
Culture01_2362_14	Culture01_2362	16854	17258	499828390	OsmC-like protein [Nitrobacter hamburgensis]_x0001_
Culture01_2362_15	Culture01_2362	17341	18771	499633030	F0F1 ATP synthase subunit beta [Nitrobacter winogradskyi]_x0001_
Culture01_2362_16	Culture01_2362	19129	19536	499633031	F0F1 ATP synthase subunit epsilon [Nitrobacter winogradskyi]_x0001_
Culture01_2362_17	Culture01_2362	19582	20100	497484357	RNA pyrophosphohydrolase [Nitrobacter sp. Nb-311A]_x0001_
Culture01_2409_1	Culture01_2409	3	377	497485803	3-hydroxyisobutyrate dehydrogenase [Nitrobacter sp. Nb-311A]_x0001_
Culture01_2409_2	Culture01_2409	411	1481	497485802	3-hydroxyisobutyryl-CoA hydrolase [Nitrobacter sp. Nb-311A]_x0001_
Culture01_2409_3	Culture01_2409	1481	2623	499830273	acyl-CoA dehydrogenase [Nitrobacter hamburgensis]_x0001_
Culture01_2409_4	Culture01_2409	2639	4132	499830274	methylmalonate-semialdehyde dehydrogenase [Nitrobacter hamburgensis]_x0001_
Culture01_2409_5	Culture01_2409	4228	5397	85697587	thiolase [Nitrobacter sp. Nb-311A]
Culture01_2409_6	Culture01_2409	5794	6384	497485797	histone-lysine N-methyltransferase with a SET domain [Nitrobacter sp. Nb-311A]_x0001_
Culture01_2409_7	Culture01_2409	6779	7246	497485795	hypothetical protein [Nitrobacter sp. Nb-311A]_x0001_
Culture01_2409_8	Culture01_2409	7336	8028	85697582	hypothetical protein NB311A_18381 [Nitrobacter sp. Nb-311A]
Culture01_2409_9	Culture01_2409	8061	8420	750393939	aldehyde-activating protein [Nitrobacter sp. Nb-311A]
Culture01_2409_10	Culture01_2409	8568	9509	85697580	hypothetical protein NB311A_18371 [Nitrobacter sp. Nb-311A]
Culture01_2409_11	Culture01_2409	9636	9980	497485791	hypothetical protein [Nitrobacter sp. Nb-311A]_x0001_
Culture01_2409_14	Culture01_2409	12178	13485	497485790	adenylosuccinate lyase [Nitrobacter sp. Nb-311A]_x0001_
Culture01_2409_15	Culture01_2409	13712	14320	752697475	pilus assembly protein PilZ [Nitrobacter winogradskyi]
Culture01_2409_16	Culture01_2409	14879	15478	499634659	transglutaminase [Nitrobacter winogradskyi]_x0001_
Culture01_2409_17	Culture01_2409	15654	16118	91800980	Peptidylprolyl isomerase [Nitrobacter hamburgensis X14]
Culture01_2409_18	Culture01_2409	16220	16750	497485786	acetyltransferase [Nitrobacter sp. Nb-311A]_x0001_
Culture01_2409_19	Culture01_2409	16794	17123	91800983	conserved hypothetical protein [Nitrobacter hamburgensis X14]
Culture01_2409_20	Culture01_2409	17326	18033	85697572	hypothetical protein NB311A_18331 [Nitrobacter sp. Nb-311A]
Culture01_2409_21	Culture01_2409	18043	18261	497485783	hypothetical protein [Nitrobacter sp. Nb-311A]_x0001_
Culture01_2409_22	Culture01_2409	18582	19412	85697569	serine O-acetyltransferase [Nitrobacter sp. Nb-311A]
Culture01_2409_23	Culture01_2409	19669	21090	750393929	hypothetical protein [Nitrobacter sp. Nb-311A]
Culture01_2409_24	Culture01_2409	21048	21800	497485779	alpha/beta hydrolase [Nitrobacter sp. Nb-311A]_x0001_
Culture01_2409_25	Culture01_2409	21857	22873	499830297	signal peptide protein [Nitrobacter hamburgensis]_x0001_
Culture01_2409_26	Culture01_2409	23275	23520	499830298	hypothetical protein [Nitrobacter hamburgensis]_x0001_
Culture01_2414_1	Culture01_2414	1	411	497483486	hypothetical protein [Nitrobacter sp. Nb-311A]_x0001_
Culture01_2414_2	Culture01_2414	473	886	501557621	hypothetical protein [Oligotropha carboxidovorans]_x0001_
Culture01_2414_3	Culture01_2414	1526	1978	740461594	hypothetical protein [alpha proteobacterium LLX12A]
Culture01_2414_4	Culture01_2414	2042	2719	737099640	hypothetical protein [Devosia riboflavina]_x0001_
Culture01_2427_1	Culture01_2427	1	4119	499634068	alpha-2-macroglobulin [Nitrobacter winogradskyi]_x0001_
Culture01_2427_2	Culture01_2427	4116	6239	499634067	penicillin-binding protein 1C [Nitrobacter winogradskyi]_x0001_
Culture01_2427_3	Culture01_2427	6292	8034	85696892	glycosyl transferase, family 39 [Nitrobacter sp. Nb-311A]
Culture01_2427_4	Culture01_2427	8311	9072	499634065	dolichol-phosphate mannosyltransferase [Nitrobacter winogradskyi]_x0001_
Culture01_2427_5	Culture01_2427	9065	9388	499634064	membrane protein [Nitrobacter winogradskyi]_x0001_
Culture01_2427_6	Culture01_2427	9422	10618	499634063	cystathionine beta-lyase [Nitrobacter winogradskyi]_x0001_
Culture01_2427_7	Culture01_2427	11043	12080	497485245	amino acid ABC transporter substrate-binding protein [Nitrobacter sp. Nb-311A]_x0001_
Culture01_2427_8	Culture01_2427	12095	13300	499634061	amino acid ABC transporter permease [Nitrobacter winogradskyi]_x0001_
Culture01_2427_9	Culture01_2427	13297	14817	497485436	amino acid ABC transporter permease [Nitrobacter sp. Nb-311A]_x0001_
Culture01_2427_10	Culture01_2427	14833	15576	499634059	arginine ABC transporter ATP-binding protein [Nitrobacter winogradskyi]_x0001_
Culture01_2427_11	Culture01_2427	15590	16648	74420587	pyridoxal-5'-phosphate-dependent enzyme, beta subunit [Nitrobacter winogradskyi Nb-255]
Culture01_2427_12	Culture01_2427	16970	18562	497485432	RND transporter [Nitrobacter sp. Nb-311A]_x0001_
Culture01_2427_13	Culture01_2427	18552	19877	497485431	transporter [Nitrobacter sp. Nb-311A]_x0001_
Culture01_2427_14	Culture01_2427	19942	23064	497485430	acriflavine resistance protein B [Nitrobacter sp. Nb-311A]_x0001_
Culture01_2427_15	Culture01_2427	23064	26159	497485429	acriflavine resistance protein B [Nitrobacter sp. Nb-311A]_x0001_
Culture01_2427_16	Culture01_2427	26210	26935	750393620	hypothetical protein [Nitrobacter sp. Nb-311A]
Culture01_246_1	Culture01_246	3	494	657883198	endonuclease [Bradyrhizobium sp. URHD0069]
Culture01_246_5	Culture01_246	3099	3929	85698553	hypothetical protein NB311A_20836 [Nitrobacter sp. Nb-311A]
Culture01_246_6	Culture01_246	4062	4919	499634863	formyltetrahydrofolate deformylase [Nitrobacter winogradskyi]_x0001_
Culture01_246_7	Culture01_246	5364	6674	499634861	UDP-glucose 6-dehydrogenase [Nitrobacter winogradskyi]_x0001_
Culture01_2512_1	Culture01_2512	1	1467	497482895	carboxysome shell protein [Nitrobacter sp. Nb-311A]_x0001_
Culture01_2512_2	Culture01_2512	2031	2366	488804978	hypothetical protein [Afipia felis]_x0001_
Culture01_2514_2	Culture01_2514	774	1373	497484224	hypothetical protein [Nitrobacter sp. Nb-311A]_x0001_
Culture01_2514_4	Culture01_2514	1738	3258	497484223	FAD-dependent pyridine nucleotide-disulfide oxidoreductase [Nitrobacter sp. Nb-311A]_x0001_
Culture01_2514_5	Culture01_2514	3387	3941	750392946	cysteine methyltransferase [Nitrobacter sp. Nb-311A]
Culture01_2514_6	Culture01_2514	4251	6749	750392942	chemotaxis protein [Nitrobacter sp. Nb-311A]
Culture01_2514_7	Culture01_2514	6736	7092	497484220	MFS transporter [Nitrobacter sp. Nb-311A]_x0001_
Culture01_2514_8	Culture01_2514	7132	7989	497484219	zinc finger/thioredoxin [Nitrobacter sp. Nb-311A]_x0001_
Culture01_2514_9	Culture01_2514	8339	8998	497484217	cell division protein FtsE [Nitrobacter sp. Nb-311A]_x0001_
Culture01_2514_10	Culture01_2514	9024	9962	497484216	cell division protein FtsX [Nitrobacter sp. Nb-311A]_x0001_
Culture01_2514_11	Culture01_2514	10057	10734	499828527	hypothetical protein [Nitrobacter hamburgensis]_x0001_
Culture01_2514_12	Culture01_2514	10822	11580	497484214	1-acyl-sn-glycerol-3-phosphate acyltransferase [Nitrobacter sp. Nb-311A]_x0001_
Culture01_2514_13	Culture01_2514	11632	12216	750392794	gamma-glutamyl cyclotransferase [Nitrobacter sp. Nb-311A]
Culture01_2514_14	Culture01_2514	12443	13630	497484212	hypothetical protein [Nitrobacter sp. Nb-311A]_x0001_
Culture01_2514_15	Culture01_2514	13650	14591	497484211	cyclohexadienyl dehydrogenase [Nitrobacter sp. Nb-311A]_x0001_
Culture01_2514_16	Culture01_2514	14588	15685	85699476	histidinol-phosphate aminotransferase [Nitrobacter sp. Nb-311A]
Culture01_2514_17	Culture01_2514	15812	16663	497484209	hypothetical protein [Nitrobacter sp. Nb-311A]_x0001_
Culture01_2566_4	Culture01_2566	1850	2206	499830686	hypothetical protein [Nitrobacter hamburgensis]_x0001_
Culture01_2566_5	Culture01_2566	2706	3089	85698644	transcriptional regulatory protein [Nitrobacter sp. Nb-311A]
Culture01_2566_7	Culture01_2566	3775	4137	497483428	hypothetical protein [Nitrobacter sp. Nb-311A]_x0001_
Culture01_2682_3	Culture01_2682	4104	6065	739137409	asparagine synthase [Pseudomonas pseudoalcaligenes]
Culture01_2682_5	Culture01_2682	7385	8632	739137643	hypothetical protein [Pseudomonas pseudoalcaligenes]
Culture01_2682_6	Culture01_2682	8636	9388	665831010	hypothetical protein, partial [Mesorhizobium sp. L103C565B0]
Culture01_2682_9	Culture01_2682	11508	12575	665494046	VI polysaccharide biosynthesis protein VipB/tviC [alpha proteobacterium MA2]
Culture01_2682_10	Culture01_2682	12587	13420	518281044	Vi polysaccharide biosynthesis protein vipA/tviB [Cupriavidus sp. BIS7]
Culture01_2710_1	Culture01_2710	129	707	497482967	histidine kinase [Nitrobacter sp. Nb-311A]_x0001_
Culture01_2710_2	Culture01_2710	718	1263	497482966	chemotaxis protein CheY [Nitrobacter sp. Nb-311A]_x0001_
Culture01_2710_3	Culture01_2710	1464	2243	497482964	inorganic polyphosphate/ATP-NAD kinase [Nitrobacter sp. Nb-311A]_x0001_
Culture01_2710_5	Culture01_2710	2952	3353	497482962	signal peptide protein [Nitrobacter sp. Nb-311A]_x0001_
Culture01_2710_6	Culture01_2710	3617	4327	497482961	membrane protein [Nitrobacter sp. Nb-311A]_x0001_
Culture01_2710_7	Culture01_2710	4495	6459	74420400	TonB-dependent siderophore receptor [Nitrobacter winogradskyi Nb-255]
Culture01_2728_3	Culture01_2728	2409	2741	497483292	antibiotic biosynthesis monooxygenase [Nitrobacter sp. Nb-311A]_x0001_
Culture01_2728_5	Culture01_2728	3093	3356	85697731	hypothetical protein NB311A_17564 [Nitrobacter sp. Nb-311A]
Culture01_2728_7	Culture01_2728	3610	4473	497483328	rare lipoprotein A [Nitrobacter sp. Nb-311A]_x0001_
Culture01_2728_8	Culture01_2728	4597	5838	497483327	D-alanyl-D-alanine carboxypeptidase [Nitrobacter sp. Nb-311A]_x0001_
Culture01_2728_9	Culture01_2728	5838	6530	497483326	thymidylate kinase [Nitrobacter sp. Nb-311A]_x0001_
Culture01_2728_10	Culture01_2728	6527	7567	497483325	DNA polymerase III subunit delta' [Nitrobacter sp. Nb-311A]_x0001_
Culture01_2728_11	Culture01_2728	7620	9596	85697726	methionine--tRNA ligase [Nitrobacter sp. Nb-311A]
Culture01_2728_13	Culture01_2728	10040	11545	85698019	hypothetical protein NB311A_00930 [Nitrobacter sp. Nb-311A]
Culture01_2728_16	Culture01_2728	12909	14525	639177788	nuclease PIN [Bradyrhizobium sp. Tv2a-2]
Culture01_2729_1	Culture01_2729	2	1216	85696880	2-octaprenyl-6-methoxyphenyl hydroxylase [Nitrobacter sp. Nb-311A]
Culture01_2729_2	Culture01_2729	1307	1639	752697332	DNA-binding protein [Nitrobacter winogradskyi]
Culture01_2729_3	Culture01_2729	1712	2485	497485393	Invasion associated locus B [Nitrobacter sp. Nb-311A]_x0001_
Culture01_2729_4	Culture01_2729	2742	4730	499634043	bicyclomycin resistance protein [Nitrobacter winogradskyi]_x0001_
Culture01_2729_5	Culture01_2729	4735	6237	499634044	AMP-dependent synthetase/ligase [Nitrobacter winogradskyi]_x0001_
Culture01_2729_6	Culture01_2729	6323	7555	497485421	signal peptide protein [Nitrobacter sp. Nb-311A]_x0001_
Culture01_2729_7	Culture01_2729	7562	11086	497485422	transcription-repair coupling factor [Nitrobacter sp. Nb-311A]_x0001_
Culture01_2729_9	Culture01_2729	11528	13627	499829798	ATP-dependent DNA helicase RecG [Nitrobacter hamburgensis]_x0001_
Culture01_2729_10	Culture01_2729	13734	14507	750393623	membrane protein [Nitrobacter sp. Nb-311A]
Culture01_2729_11	Culture01_2729	14612	16219	497485426	glucosamine--fructose-6-phosphate aminotransferase [Nitrobacter sp. Nb-311A]_x0001_
Culture01_2773_2	Culture01_2773	150	563	497483936	hypothetical protein [Nitrobacter sp. Nb-311A]_x0001_
Culture01_2773_3	Culture01_2773	614	1297	499633826	peptidase M48 [Nitrobacter winogradskyi]_x0001_
Culture01_2773_4	Culture01_2773	1486	2427	497483933	transcriptional regulator [Nitrobacter sp. Nb-311A]_x0001_
Culture01_2773_5	Culture01_2773	2424	3650	497483932	hypothetical protein [Nitrobacter sp. Nb-311A]_x0001_
Culture01_2773_6	Culture01_2773	4119	5561	497483931	peptidase C14, caspase catalytic subunit p20 [Nitrobacter sp. Nb-311A]_x0001_
Culture01_2773_7	Culture01_2773	5756	6043	499829299	hypothetical protein [Nitrobacter hamburgensis]_x0001_
Culture01_2773_9	Culture01_2773	6945	7391	85695628	hypothetical protein NB311A_10021 [Nitrobacter sp. Nb-311A]
Culture01_2773_10	Culture01_2773	8632	9723	499633835	recombinase RecA [Nitrobacter winogradskyi]_x0001_
Culture01_2773_12	Culture01_2773	10166	13030	497483004	glycine dehydrogenase [Nitrobacter sp. Nb-311A]_x0001_
Culture01_2773_13	Culture01_2773	13107	13472	499633838	glycine cleavage system protein H [Nitrobacter winogradskyi]_x0001_
Culture01_2773_14	Culture01_2773	13482	14645	85698111	glycine cleavage system T protein [Nitrobacter sp. Nb-311A]
Culture01_2773_15	Culture01_2773	15138	17813	91800065	alanyl-tRNA synthetase [Nitrobacter hamburgensis X14]
Culture01_2773_16	Culture01_2773	17875	19092	497483000	isocitrate dehydrogenase [Nitrobacter sp. Nb-311A]_x0001_
Culture01_2773_17	Culture01_2773	19336	20541	499633845	RNA methyltransferase [Nitrobacter winogradskyi]_x0001_
Culture01_2773_18	Culture01_2773	20655	21416	84510497	hypothetical protein SKA53_01111 [Loktanella vestfoldensis SKA53]
Culture01_2773_21	Culture01_2773	23121	23786	503679173	hypothetical protein [Oligotropha carboxidovorans]_x0001_
Culture01_2773_22	Culture01_2773	24032	24532	85698105	cyanate hydratase [Nitrobacter sp. Nb-311A]
Culture01_2773_23	Culture01_2773	24675	24998	497482995	hypothetical protein [Nitrobacter sp. Nb-311A]_x0001_
Culture01_2773_24	Culture01_2773	25301	26098	750391985	phosphoribosylaminoimidazole-succinocarboxamide synthase [Nitrobacter sp. Nb-311A]
Culture01_2773_25	Culture01_2773	26141	26380	499633852	phosphoribosylformylglycinamidine synthase [Nitrobacter winogradskyi]_x0001_
Culture01_2773_26	Culture01_2773	26393	27094	499633853	phosphoribosylformylglycinamidine synthase [Nitrobacter winogradskyi]_x0001_
Culture01_2773_27	Culture01_2773	27410	28630	504577431	cytochrome P450 [Sinorhizobium fredii]_x0001_
Culture01_2773_28	Culture01_2773	28798	31008	85698099	phosphoribosylformylglycinamidine synthase subunit II [Nitrobacter sp. Nb-311A]
Culture01_2773_29	Culture01_2773	31256	31639	657880902	hypothetical protein [Bradyrhizobium sp. URHD0069]
Culture01_2773_30	Culture01_2773	32208	32441	497482989	ATP-binding protein [Nitrobacter sp. Nb-311A]_x0001_
Culture01_2773_31	Culture01_2773	32449	33414	752697997	methyltransferase [Nitrobacter winogradskyi]
Culture01_2773_32	Culture01_2773	33458	34750	499829408	hypothetical protein [Nitrobacter hamburgensis]_x0001_
Culture01_2773_33	Culture01_2773	35009	35347	499633859	glutaredoxin [Nitrobacter winogradskyi]_x0001_
Culture01_2773_35	Culture01_2773	36051	36668	497482984	30S ribosomal protein S4 [Nitrobacter sp. Nb-311A]_x0001_
Culture01_2773_36	Culture01_2773	37022	37873	497482982	glutamate racemase [Nitrobacter sp. Nb-311A]_x0001_
Culture01_2773_37	Culture01_2773	38219	38776	499633863	hypothetical protein [Nitrobacter winogradskyi]_x0001_
Culture01_2773_39	Culture01_2773	39948	40730	750391984	membrane protein [Nitrobacter sp. Nb-311A]
Culture01_2773_40	Culture01_2773	40926	41354	497482977	inosine-5-monophosphate dehydrogenase [Nitrobacter sp. Nb-311A]_x0001_
Culture01_2773_41	Culture01_2773	41367	42413	750392005	phospholipase [Nitrobacter sp. Nb-311A]
Culture01_2773_42	Culture01_2773	42881	43675	497482975	signal peptide protein [Nitrobacter sp. Nb-311A]_x0001_
Culture01_2773_43	Culture01_2773	44645	45424	85698082	hypothetical protein NB311A_01245 [Nitrobacter sp. Nb-311A]
Culture01_2773_44	Culture01_2773	45521	45976	499633873	nitrogen-fixing protein NifU [Nitrobacter winogradskyi]_x0001_
Culture01_2773_45	Culture01_2773	46225	46923	497482971	GTP cyclohydrolase [Nitrobacter sp. Nb-311A]_x0001_
Culture01_2773_46	Culture01_2773	47006	47401	499829423	phosphoribosyl-AMP cyclohydrolase [Nitrobacter hamburgensis]_x0001_
Culture01_2773_47	Culture01_2773	47916	48860	499633876	transglycosylase [Nitrobacter winogradskyi]_x0001_
Culture01_2773_48	Culture01_2773	49097	50761	497482968	hypothetical protein [Nitrobacter sp. Nb-311A]_x0001_
Culture01_2775_2	Culture01_2775	386	2554	499633951	lipopolysaccharide biosynthesis protein [Nitrobacter winogradskyi]_x0001_
Culture01_2775_3	Culture01_2775	2577	3770	497485270	hypothetical protein [Nitrobacter sp. Nb-311A]_x0001_
Culture01_2775_5	Culture01_2775	4264	5346	91800875	cytochrome oxidase assembly [Nitrobacter hamburgensis X14]
Culture01_2775_6	Culture01_2775	5632	6879	499830185	major facilitator transporter [Nitrobacter hamburgensis]_x0001_
Culture01_2775_7	Culture01_2775	6957	8234	497485266	O-acetylhomoserine aminocarboxypropyltransferase [Nitrobacter sp. Nb-311A]_x0001_
Culture01_2775_8	Culture01_2775	8736	9200	497485265	50S ribosomal protein L13 [Nitrobacter sp. Nb-311A]_x0001_
Culture01_2775_9	Culture01_2775	9203	9679	499830180	30S ribosomal protein S9 [Nitrobacter hamburgensis]_x0001_
Culture01_2775_10	Culture01_2775	9819	10826	497485263	lytic transglycosylase [Nitrobacter sp. Nb-311A]_x0001_
Culture01_2775_11	Culture01_2775	10957	11448	499830178	virR [Nitrobacter hamburgensis]_x0001_
Culture01_2775_12	Culture01_2775	11517	12761	750393632	hypothetical protein [Nitrobacter sp. Nb-311A]
Culture01_2775_13	Culture01_2775	12920	13672	497485260	glycerophosphoryl diester phosphodiesterase [Nitrobacter sp. Nb-311A]_x0001_
Culture01_2775_14	Culture01_2775	13678	14145	497485259	endoribonuclease [Nitrobacter sp. Nb-311A]_x0001_
Culture01_2775_15	Culture01_2775	14345	15262	85696901	hypothetical protein NB311A_19482 [Nitrobacter sp. Nb-311A]
Culture01_2775_16	Culture01_2775	15329	16621	499633965	DNA polymerase IV [Nitrobacter winogradskyi]_x0001_
Culture01_2775_17	Culture01_2775	16618	16920	497485254	hypothetical protein [Nitrobacter sp. Nb-311A]_x0001_
Culture01_2775_18	Culture01_2775	17149	17514	499633967	chemotaxis protein CheY [Nitrobacter winogradskyi]_x0001_
Culture01_2775_19	Culture01_2775	17525	18898	497485252	diguanylate cyclase [Nitrobacter sp. Nb-311A]_x0001_
Culture01_2775_21	Culture01_2775	19868	21277	752697308	channel protein TolC [Nitrobacter winogradskyi]
Culture01_2775_22	Culture01_2775	21565	22224	750392140	hypothetical protein [Nitrobacter sp. Nb-311A]
Culture01_2775_23	Culture01_2775	22425	25283	499633971	valyl-tRNA synthetase [Nitrobacter winogradskyi]_x0001_
Culture01_2775_24	Culture01_2775	25280	26446	750392144	MFS transporter [Nitrobacter sp. Nb-311A]
Culture01_2775_25	Culture01_2775	26427	27050	752698024	3-methyladenine DNA glycosylase [Nitrobacter winogradskyi]
Culture01_2775_26	Culture01_2775	27177	28136	497483298	radical SAM protein [Nitrobacter sp. Nb-311A]_x0001_
Culture01_2775_27	Culture01_2775	28148	28675	497483299	DNA topology modulation protein [Nitrobacter sp. Nb-311A]_x0001_
Culture01_2775_28	Culture01_2775	28675	29142	497483300	cyclase [Nitrobacter sp. Nb-311A]_x0001_
Culture01_2775_29	Culture01_2775	29155	29781	497483301	competence damage-inducible protein A [Nitrobacter sp. Nb-311A]_x0001_
Culture01_2775_30	Culture01_2775	29783	30979	499633977	2-C-methyl-D-erythritol 2,4-cyclodiphosphate synthase [Nitrobacter winogradskyi]_x0001_
Culture01_2775_31	Culture01_2775	31174	32223	750392146	dihydrouridine synthase [Nitrobacter sp. Nb-311A]
Culture01_2775_32	Culture01_2775	32220	33395	499633979	ATPase [Nitrobacter winogradskyi]_x0001_
Culture01_2775_33	Culture01_2775	33403	34842	85697707	helix-turn-helix, Fis-type / Nitrogen regulation protein NR(I) [Nitrobacter sp. Nb-311A]
Culture01_2775_34	Culture01_2775	35023	37323	499633981	ATPase [Nitrobacter winogradskyi]_x0001_
Culture01_2775_35	Culture01_2775	37341	38711	499633982	ATPase AAA [Nitrobacter winogradskyi]_x0001_
Culture01_2775_36	Culture01_2775	38734	39591	499633983	D-amino acid aminotransferase [Nitrobacter winogradskyi]_x0001_
Culture01_2775_37	Culture01_2775	39708	40019	497483310	MULTISPECIES: RNA-binding protein Hfq [Nitrobacter]_x0001_
Culture01_2775_38	Culture01_2775	40088	41422	752697310	GTPase HflX [Nitrobacter winogradskyi]
Culture01_2775_39	Culture01_2775	41630	43066	750392171	aldehyde dehydrogenase [Nitrobacter sp. Nb-311A]
Culture01_2775_40	Culture01_2775	43134	43982	497483313	nucleoside triphosphate pyrophosphohydrolase [Nitrobacter sp. Nb-311A]_x0001_
Culture01_2775_41	Culture01_2775	44117	44833	499633987	7-cyano-7-deazaguanine synthase [Nitrobacter winogradskyi]_x0001_
Culture01_2775_42	Culture01_2775	44983	45327	499633992	alkylhydroperoxidase [Nitrobacter winogradskyi]_x0001_
Culture01_2775_43	Culture01_2775	45603	46247	85697722	probable transcriptional regulator [Nitrobacter sp. Nb-311A]
Culture01_2775_46	Culture01_2775	47217	48020	499829751	PhnP [Nitrobacter hamburgensis]_x0001_
Culture01_2775_47	Culture01_2775	48017	48817	499633995	LuxR family transcriptional regulator [Nitrobacter winogradskyi]_x0001_
Culture01_2781_1	Culture01_2781	112	1926	497485732	ligand-gated channel protein [Nitrobacter sp. Nb-311A]_x0001_
Culture01_2781_2	Culture01_2781	2125	2688	752697483	peptidoglycan-binding protein [Nitrobacter winogradskyi]
Culture01_2781_3	Culture01_2781	2711	4444	497485730	histidine protein kinase [Nitrobacter sp. Nb-311A]_x0001_
Culture01_2781_4	Culture01_2781	4959	5372	499634711	hypothetical protein [Nitrobacter winogradskyi]_x0001_
Culture01_2781_5	Culture01_2781	5449	5880	497485728	cysteine desufuration protein SufE [Nitrobacter sp. Nb-311A]_x0001_
Culture01_2781_6	Culture01_2781	6000	6617	497485727	ATPase involved in DNA replication initiation [Nitrobacter sp. Nb-311A]_x0001_
Culture01_2781_7	Culture01_2781	6604	6987	85697514	ATPase involved in DNA replication initiation [Nitrobacter sp. Nb-311A]
Culture01_2781_8	Culture01_2781	7799	8212	499634715	transcriptional regulator [Nitrobacter winogradskyi]_x0001_
Culture01_2781_9	Culture01_2781	8342	9130	497485724	hypothetical protein [Nitrobacter sp. Nb-311A]_x0001_
Culture01_2781_10	Culture01_2781	9431	10837	497485722	hypothetical protein [Nitrobacter sp. Nb-311A]_x0001_
Culture01_2781_11	Culture01_2781	10874	12235	499634718	hypothetical protein [Nitrobacter winogradskyi]_x0001_
Culture01_2781_12	Culture01_2781	12292	13857	497485720	hypothetical protein [Nitrobacter sp. Nb-311A]_x0001_
Culture01_2781_14	Culture01_2781	14398	14805	497485717	ferredoxin [Nitrobacter sp. Nb-311A]_x0001_
Culture01_2781_15	Culture01_2781	14862	15764	91801039	Dihydropteroate synthase [Nitrobacter hamburgensis X14]
Culture01_2781_16	Culture01_2781	15761	16126	497485715	dihydroneopterin aldolase [Nitrobacter sp. Nb-311A]_x0001_
Culture01_2781_17	Culture01_2781	16135	16626	497485714	2-amino-4-hydroxy-6-hydroxymethyldihydropteridine pyrophosphokinase [Nitrobacter sp. Nb-311A]_x0001_
Culture01_2781_18	Culture01_2781	16778	18682	499634724	methylmalonyl-CoA mutase [Nitrobacter winogradskyi]_x0001_
Culture01_2781_19	Culture01_2781	18667	19131	499634725	aldehyde-activating protein [Nitrobacter winogradskyi]_x0001_
Culture01_2781_21	Culture01_2781	19544	21709	85697499	methylmalonyl-CoA mutase [Nitrobacter sp. Nb-311A]
Culture01_2781_22	Culture01_2781	21828	22637	74421294	conserved hypothetical protein [Nitrobacter winogradskyi Nb-255]
Culture01_2781_23	Culture01_2781	22634	23614	499634728	arginine/ornithine transport system ATPase [Nitrobacter winogradskyi]_x0001_
Culture01_2781_24	Culture01_2781	23670	24305	497485708	peptidase C15 [Nitrobacter sp. Nb-311A]_x0001_
Culture01_2781_25	Culture01_2781	24423	25685	497485707	major facilitator transporter [Nitrobacter sp. Nb-311A]_x0001_
Culture01_2781_26	Culture01_2781	25792	27159	499634731	nitrous oxidase accessory protein [Nitrobacter winogradskyi]_x0001_
Culture01_2781_27	Culture01_2781	27265	27669	497485887	hypothetical protein [Nitrobacter sp. Nb-311A]_x0001_
Culture01_2781_29	Culture01_2781	27981	28184	497485886	hypothetical protein [Nitrobacter sp. Nb-311A]_x0001_
Culture01_2781_30	Culture01_2781	28552	30396	85696535	peptidase S8 and S53, subtilisin, kexin, sedolisin [Nitrobacter sp. Nb-311A]
Culture01_2781_31	Culture01_2781	30457	31149	497485884	hypothetical protein [Nitrobacter sp. Nb-311A]_x0001_
Culture01_2781_32	Culture01_2781	31146	31646	499634736	RNA polymerase sigma factor [Nitrobacter winogradskyi]_x0001_
Culture01_2781_33	Culture01_2781	32085	33191	497485882	hypothetical protein [Nitrobacter sp. Nb-311A]_x0001_
Culture01_2781_34	Culture01_2781	33482	34201	499634739	hypothetical protein [Nitrobacter winogradskyi]_x0001_
Culture01_2781_35	Culture01_2781	34408	35187	85696529	enoyl-CoA hydratase/isomerase [Nitrobacter sp. Nb-311A]
Culture01_2781_36	Culture01_2781	35230	37077	91801067	conserved hypothetical protein [Nitrobacter hamburgensis X14]
Culture01_2781_37	Culture01_2781	37171	38418	499830375	threonine dehydratase [Nitrobacter hamburgensis]_x0001_
Culture01_2781_38	Culture01_2781	38716	39003	499830376	signal peptide protein [Nitrobacter hamburgensis]_x0001_
Culture01_2781_40	Culture01_2781	39151	42513	499830377	DNA polymerase [Nitrobacter hamburgensis]_x0001_
Culture01_2781_41	Culture01_2781	42510	43985	752711024	DNA polymerase [Nitrobacter hamburgensis]
Culture01_2781_42	Culture01_2781	44029	44841	91801072	conserved hypothetical protein [Nitrobacter hamburgensis X14]
Culture01_2781_43	Culture01_2781	45161	46330	497485873	amidohydrolase [Nitrobacter sp. Nb-311A]_x0001_
Culture01_2781_44	Culture01_2781	46580	47527	499830383	metallophosphoesterase [Nitrobacter hamburgensis]_x0001_
Culture01_2790_1	Culture01_2790	1	621	499830311	glycosyl transferase [Nitrobacter hamburgensis]_x0001_
Culture01_2790_2	Culture01_2790	629	1759	497485760	dolichol monophosphate mannose synthase [Nitrobacter sp. Nb-311A]_x0001_
Culture01_2790_3	Culture01_2790	2032	2835	497485759	hypothetical protein [Nitrobacter sp. Nb-311A]_x0001_
Culture01_2790_4	Culture01_2790	3022	3708	499634687	hypothetical protein [Nitrobacter winogradskyi]_x0001_
Culture01_2790_5	Culture01_2790	3726	4883	497485756	mannose-1-phosphate guanyltransferase [Nitrobacter sp. Nb-311A]_x0001_
Culture01_2790_6	Culture01_2790	4883	5824	497485755	multidrug ABC transporter ATP-binding protein [Nitrobacter sp. Nb-311A]_x0001_
Culture01_2790_7	Culture01_2790	5821	6609	499828570	hemolysin D [Nitrobacter hamburgensis]_x0001_
Culture01_2790_8	Culture01_2790	6606	7325	752710536	TetR family transcriptional regulator [Nitrobacter hamburgensis]
Culture01_2790_9	Culture01_2790	7634	9238	497485752	4-diphosphocytidyl-2C-methyl-D-erythritol kinase [Nitrobacter sp. Nb-311A]_x0001_
Culture01_2790_10	Culture01_2790	9235	9867	497485751	hypothetical protein [Nitrobacter sp. Nb-311A]_x0001_
Culture01_2790_11	Culture01_2790	10164	10487	497485750	hypothetical protein [Nitrobacter sp. Nb-311A]_x0001_
Culture01_2790_12	Culture01_2790	10471	11700	497485749	von Willebrand factor A [Nitrobacter sp. Nb-311A]_x0001_
Culture01_2790_13	Culture01_2790	11714	12619	497485748	ATPase [Nitrobacter sp. Nb-311A]_x0001_
Culture01_2790_14	Culture01_2790	12653	13459	499634693	carbon-monoxide dehydrogenase [Nitrobacter winogradskyi]_x0001_
Culture01_2790_15	Culture01_2790	13504	13989	653482392	carbon monoxide dehydrogenase [Bradyrhizobium sp. Cp5.3]
Culture01_2790_16	Culture01_2790	14128	14574	499830322	carbon monoxide dehydrogenase [Nitrobacter hamburgensis]_x0001_
Culture01_2790_17	Culture01_2790	14754	15536	497485744	3-oxoadipate enol-lactonase [Nitrobacter sp. Nb-311A]_x0001_
Culture01_2790_18	Culture01_2790	15591	16118	85697531	hypothetical protein NB311A_18126 [Nitrobacter sp. Nb-311A]
Culture01_2790_19	Culture01_2790	16555	17469	497485742	branched-chain amino acid transporter permease subunit LivH [Nitrobacter sp. Nb-311A]_x0001_
Culture01_2790_20	Culture01_2790	17441	18865	85697529	ABC-type branched-chain amino acid transport system permease component [Nitrobacter sp. Nb-311A]
Culture01_2790_21	Culture01_2790	18862	19698	499634700	branched-chain amino acid ABC transporter ATP-binding protein [Nitrobacter winogradskyi]_x0001_
Culture01_2790_22	Culture01_2790	19695	20438	499634701	amino acid ABC transporter ATPase [Nitrobacter winogradskyi]_x0001_
Culture01_2790_23	Culture01_2790	20620	21735	499830329	ABC transporter [Nitrobacter hamburgensis]_x0001_
Culture01_2790_24	Culture01_2790	21838	22572	497485737	cytochrome C biogenesis protein [Nitrobacter sp. Nb-311A]_x0001_
Culture01_2790_25	Culture01_2790	22723	23721	85697524	peptidase S58, DmpA [Nitrobacter sp. Nb-311A]
Culture01_2790_26	Culture01_2790	23918	24172	499830332	hypothetical protein [Nitrobacter hamburgensis]_x0001_
Culture01_2790_27	Culture01_2790	24169	25371	497485734	hypothetical protein [Nitrobacter sp. Nb-311A]_x0001_
Culture01_2790_28	Culture01_2790	25681	26382	499830334	ribulose-phosphate 3-epimerase [Nitrobacter hamburgensis]_x0001_
Culture01_2804_1	Culture01_2804	3	458	497484798	Holliday junction DNA helicase RuvB [Nitrobacter sp. Nb-311A]_x0001_
Culture01_2804_2	Culture01_2804	455	916	499635188	4-hydroxybenzoyl-CoA thioesterase [Nitrobacter winogradskyi]_x0001_
Culture01_2804_3	Culture01_2804	1188	1661	499831156	3-demethylubiquinone-9 3-methyltransferase [Nitrobacter hamburgensis]_x0001_
Culture01_2804_4	Culture01_2804	1868	2236	497484795	hypothetical protein [Nitrobacter sp. Nb-311A]_x0001_
Culture01_2804_5	Culture01_2804	2233	3501	497484794	hypothetical protein [Nitrobacter sp. Nb-311A]_x0001_
Culture01_2804_6	Culture01_2804	3602	4138	764975004	polyketide cyclase [Bradyrhizobium sp. LTSP885]_x0001_
Culture01_2804_9	Culture01_2804	4678	5331	657877276	glutathione S-transferase [Bradyrhizobium sp. URHD0069]
Culture01_2804_10	Culture01_2804	5452	5868	497484791	dehydrogenase [Nitrobacter sp. Nb-311A]_x0001_
Culture01_2804_11	Culture01_2804	6046	6759	497484790	TetR family transcriptional regulator [Nitrobacter sp. Nb-311A]_x0001_
Culture01_2804_12	Culture01_2804	7030	7530	497484789	hypothetical protein [Nitrobacter sp. Nb-311A]_x0001_
Culture01_2804_13	Culture01_2804	8050	8763	497484788	biopolymer transporter ExbB [Nitrobacter sp. Nb-311A]_x0001_
Culture01_2804_14	Culture01_2804	8864	9250	750393145	biopolymer transporter ExbD [Nitrobacter sp. Nb-311A]
Culture01_2804_15	Culture01_2804	9253	10284	497484786	membrane protein TolA [Nitrobacter sp. Nb-311A]_x0001_
Culture01_2804_16	Culture01_2804	10344	11669	118574589	TOLCulture01_NITWN RecName: Full=Protein TolB; Flags: Precursor [Nitrobacter winogradskyi Nb-255]_x0001_
Culture01_2804_17	Culture01_2804	11855	14176	74421770	diguanylate cyclase/phosphodiesterase [Nitrobacter winogradskyi Nb-255]
Culture01_2804_18	Culture01_2804	14332	15072	497484782	hypothetical protein [Nitrobacter sp. Nb-311A]_x0001_
Culture01_2804_19	Culture01_2804	15313	15810	750393140	membrane protein [Nitrobacter sp. Nb-311A]
Culture01_2804_20	Culture01_2804	16151	17074	85698822	TPR repeat protein [Nitrobacter sp. Nb-311A]
Culture01_2804_21	Culture01_2804	17245	17628	497484779	hypothetical protein [Nitrobacter sp. Nb-311A]_x0001_
Culture01_2804_22	Culture01_2804	17645	18688	497484778	tRNA(Ile)-lysidine synthetase [Nitrobacter sp. Nb-311A]_x0001_
Culture01_2804_23	Culture01_2804	19053	20975	497484776	cell division protein FtsH [Nitrobacter sp. Nb-311A]_x0001_
Culture01_2804_24	Culture01_2804	21175	24000	85698817	pyruvate, phosphate dikinase [Nitrobacter sp. Nb-311A]
Culture01_2804_25	Culture01_2804	24316	25704	497484773	hydrolase [Nitrobacter sp. Nb-311A]_x0001_
Culture01_2804_26	Culture01_2804	26038	26628	497484772	hypothetical protein [Nitrobacter sp. Nb-311A]_x0001_
Culture01_2804_27	Culture01_2804	26691	27197	499831584	protein tyrosine/serine phosphatase [Nitrobacter hamburgensis]_x0001_
Culture01_2804_28	Culture01_2804	27333	27941	499831583	hydrolase [Nitrobacter hamburgensis]_x0001_
Culture01_2804_29	Culture01_2804	27938	28564	499635170	DNA-3-methyladenine glycosylase [Nitrobacter winogradskyi]_x0001_
Culture01_2804_30	Culture01_2804	28561	29442	497484768	folate-binding protein [Nitrobacter sp. Nb-311A]_x0001_
Culture01_2804_31	Culture01_2804	29595	30929	497484767	dihydroorotase [Nitrobacter sp. Nb-311A]_x0001_
Culture01_2804_32	Culture01_2804	31003	31269	499831579	hypothetical protein [Nitrobacter hamburgensis]_x0001_
Culture01_2804_33	Culture01_2804	31405	31731	85698807	hypothetical protein NB311A_15452 [Nitrobacter sp. Nb-311A]
Culture01_2804_34	Culture01_2804	31868	32287	499635165	NUDIX hydrolase [Nitrobacter winogradskyi]_x0001_
Culture01_2804_35	Culture01_2804	32287	32799	497484763	hypothetical protein [Nitrobacter sp. Nb-311A]_x0001_
Culture01_2804_36	Culture01_2804	32863	33630	497484762	hypothetical protein [Nitrobacter sp. Nb-311A]_x0001_
Culture01_2804_37	Culture01_2804	33627	35069	74421751	4-phosphoerythronate dehydrogenase (FAD-dependent) [Nitrobacter winogradskyi Nb-255]
Culture01_2804_38	Culture01_2804	35069	36055	499831573	translation factor Sua5 [Nitrobacter hamburgensis]_x0001_
Culture01_2804_39	Culture01_2804	36481	37263	497484759	LysR family transcriptional regulator [Nitrobacter sp. Nb-311A]_x0001_
Culture01_2804_40	Culture01_2804	37575	38612	585119	F16PA_NITVU RecName: Full=Fructose-1,6-bisphosphatase class 1; Short=FBPase class 1; AltName: Full=D-fructose-1,6-bisphosphate 1-phosphohydrolase class 1 [Nitrobacter vulgaris]_x0001_
Culture01_2804_41	Culture01_2804	38625	39497	585367	KPPR_NITVU RecName: Full=Phosphoribulokinase; Short=PRK; Short=PRKase; AltName: Full=Phosphopentokinase [Nitrobacter vulgaris]_x0001_
Culture01_2804_42	Culture01_2804	39616	40701	497484756	fructose-bisphosphate aldolase [Nitrobacter sp. Nb-311A]_x0001_
Culture01_2804_43	Culture01_2804	41326	41577	85698796	hypothetical protein NB311A_15397 [Nitrobacter sp. Nb-311A]
Culture01_2804_44	Culture01_2804	41721	42428	497484753	hypothetical protein [Nitrobacter sp. Nb-311A]_x0001_
Culture01_2804_45	Culture01_2804	42664	43626	74421743	4-hydroxy-3-methylbut-2-enyl diphosphate reductase [Nitrobacter winogradskyi Nb-255]
Culture01_2804_46	Culture01_2804	43759	44739	497484751	homoserine kinase [Nitrobacter sp. Nb-311A]_x0001_
Culture01_2804_47	Culture01_2804	44736	45185	497484750	ribonuclease H [Nitrobacter sp. Nb-311A]_x0001_
Culture01_2804_48	Culture01_2804	45860	46345	497484747	alkyl hydroperoxide reductase [Nitrobacter sp. Nb-311A]_x0001_
Culture01_2804_49	Culture01_2804	46528	47082	74421739	Protein of unknown function DUF924 [Nitrobacter winogradskyi Nb-255]
Culture01_2804_50	Culture01_2804	47131	48813	497484746	long-chain fatty acid--CoA ligase [Nitrobacter sp. Nb-311A]_x0001_
Culture01_2804_51	Culture01_2804	48991	50367	750393284	peptidase M15 [Nitrobacter sp. Nb-311A]
Culture01_2804_52	Culture01_2804	50669	52441	499831363	benzoate transporter [Nitrobacter hamburgensis]_x0001_
Culture01_2804_53	Culture01_2804	52556	53614	750393126	nitrate ABC transporter substrate-binding protein [Nitrobacter sp. Nb-311A]
Culture01_2804_54	Culture01_2804	53842	54438	74421733	DedA [Nitrobacter winogradskyi Nb-255]
Culture01_2804_57	Culture01_2804	55354	56007	497484739	hypothetical protein [Nitrobacter sp. Nb-311A]_x0001_
Culture01_2804_58	Culture01_2804	56170	56448	563494201	MULTISPECIES: transposase IS298 [Mesorhizobium]_x0001_
Culture01_2889_1	Culture01_2889	1	672	497484418	cobalt chelatase [Nitrobacter sp. Nb-311A]_x0001_
Culture01_2889_2	Culture01_2889	714	1712	497484419	aerobic cobaltochelatase subunit CobS [Nitrobacter sp. Nb-311A]_x0001_
Culture01_2889_3	Culture01_2889	1994	2653	752710490	membrane protein [Nitrobacter hamburgensis]
Culture01_2889_4	Culture01_2889	2833	3156	85699689	hypothetical protein NB311A_04574 [Nitrobacter sp. Nb-311A]
Culture01_2889_5	Culture01_2889	3200	3847	91799011	heat shock protein DnaJ-like protein [Nitrobacter hamburgensis X14]
Culture01_2889_6	Culture01_2889	3937	4233	85699692	BolA-like protein [Nitrobacter sp. Nb-311A]
Culture01_2889_7	Culture01_2889	4483	5616	497484424	hypothetical protein [Nitrobacter sp. Nb-311A]_x0001_
Culture01_2889_8	Culture01_2889	5620	5937	499632995	pilus assembly protein PilZ [Nitrobacter winogradskyi]_x0001_
Culture01_2889_9	Culture01_2889	6015	7334	499632994	DNA-binding protein [Nitrobacter winogradskyi]_x0001_
Culture01_2889_10	Culture01_2889	7669	8820	497484427	3-dehydroquinate synthase [Nitrobacter sp. Nb-311A]_x0001_
Culture01_2889_11	Culture01_2889	8817	9512	499632992	shikimate kinase [Nitrobacter winogradskyi]_x0001_
Culture01_2889_13	Culture01_2889	9850	10809	750393017	recombinase XerD [Nitrobacter sp. Nb-311A]
Culture01_2889_14	Culture01_2889	11056	12006	499632989	acetyl-CoA carboxylase subunit alpha [Nitrobacter winogradskyi]_x0001_
Culture01_2889_15	Culture01_2889	12308	13795	497484433	hypothetical protein [Nitrobacter sp. Nb-311A]_x0001_
Culture01_2889_16	Culture01_2889	14000	16861	497484434	preprotein translocase subunit SecA [Nitrobacter sp. Nb-311A]_x0001_
Culture01_2889_17	Culture01_2889	17294	18301	497484435	peptidyl-prolyl cis-trans isomerase [Nitrobacter sp. Nb-311A]_x0001_
Culture01_2889_18	Culture01_2889	18464	19705	750392845	N-acetylglutamate synthase [Nitrobacter sp. Nb-311A]
Culture01_2889_20	Culture01_2889	20326	20727	752697061	NTP pyrophosphohydrolase [Nitrobacter winogradskyi]
Culture01_2889_21	Culture01_2889	20865	21737	91798996	methyltransferase [Nitrobacter hamburgensis X14]
Culture01_2889_22	Culture01_2889	21827	22642	497484439	amidophosphoribosyltransferase [Nitrobacter sp. Nb-311A]_x0001_
Culture01_2889_23	Culture01_2889	22696	23577	497484440	amidohydrolase [Nitrobacter sp. Nb-311A]_x0001_
Culture01_2889_24	Culture01_2889	23574	23816	497484441	hypothetical protein [Nitrobacter sp. Nb-311A]_x0001_
Culture01_2889_25	Culture01_2889	23813	24256	499632979	hypothetical protein [Nitrobacter winogradskyi]_x0001_
Culture01_2889_26	Culture01_2889	24263	24700	499828336	transporter [Nitrobacter hamburgensis]_x0001_
Culture01_2889_27	Culture01_2889	24701	25600	91798990	conserved hypothetical protein [Nitrobacter hamburgensis X14]
Culture01_2889_28	Culture01_2889	25648	26421	499632978	3-demethylubiquinone-9 3-methyltransferase [Nitrobacter winogradskyi]_x0001_
Culture01_2889_29	Culture01_2889	26848	28086	499632976	aspartate kinase [Nitrobacter winogradskyi]_x0001_
Culture01_2889_30	Culture01_2889	28347	30614	497484446	peptidase [Nitrobacter sp. Nb-311A]_x0001_
Culture01_2889_31	Culture01_2889	30859	31935	85699716	Peptide chain release factor 1 [Nitrobacter sp. Nb-311A]
Culture01_2889_32	Culture01_2889	32005	32901	497484448	N5-glutamine S-adenosyl-L-methionine-dependent methyltransferase [Nitrobacter sp. Nb-311A]_x0001_
Culture01_2889_33	Culture01_2889	33367	34068	497484449	hypothetical protein [Nitrobacter sp. Nb-311A]_x0001_
Culture01_2889_34	Culture01_2889	34124	34879	85699719	hypothetical protein NB311A_04724 [Nitrobacter sp. Nb-311A]
Culture01_2889_35	Culture01_2889	35199	35966	497484451	hydroxyacylglutathione hydrolase [Nitrobacter sp. Nb-311A]_x0001_
Culture01_2889_36	Culture01_2889	36007	36612	499632964	recombinase RecR [Nitrobacter winogradskyi]_x0001_
Culture01_2889_37	Culture01_2889	36778	37098	497484050	hypothetical protein [Nitrobacter sp. Nb-311A]_x0001_
Culture01_2889_38	Culture01_2889	37159	38997	85696043	DNA polymerase III subunits gamma and tau [Nitrobacter sp. Nb-311A]
Culture01_2889_39	Culture01_2889	39347	39796	499828321	histidine triad (HIT) protein [Nitrobacter hamburgensis]_x0001_
Culture01_2889_40	Culture01_2889	39856	40779	497484047	sugar kinase [Nitrobacter sp. Nb-311A]_x0001_
Culture01_2889_41	Culture01_2889	40867	41376	497484046	transcriptional regulator [Nitrobacter sp. Nb-311A]_x0001_
Culture01_2889_43	Culture01_2889	41493	42992	497484045	phosphoglucomutase [Nitrobacter sp. Nb-311A]_x0001_
Culture01_2889_44	Culture01_2889	43251	43778	497484044	peptidase [Nitrobacter sp. Nb-311A]_x0001_
Culture01_2889_45	Culture01_2889	43923	44633	497484043	ATPase [Nitrobacter sp. Nb-311A]_x0001_
Culture01_2889_46	Culture01_2889	44716	47205	499828315	ATP-dependent helicase [Nitrobacter hamburgensis]_x0001_
Culture01_2889_47	Culture01_2889	47493	48542	74419426	acyltransferase 3 [Nitrobacter winogradskyi Nb-255]
Culture01_2889_48	Culture01_2889	48645	51704	499632955	DNA polymerase I [Nitrobacter winogradskyi]_x0001_
Culture01_2889_49	Culture01_2889	51981	52961	499828310	DNA repair protein [Nitrobacter hamburgensis]_x0001_
Culture01_2889_51	Culture01_2889	53228	55984	497484077	ATP-dependent DNA ligase [Nitrobacter sp. Nb-311A]_x0001_
Culture01_2889_52	Culture01_2889	55981	56955	497484078	arginase [Nitrobacter sp. Nb-311A]_x0001_
Culture01_2889_53	Culture01_2889	56980	57876	499828306	beta-lactamase [Nitrobacter hamburgensis]_x0001_
Culture01_2889_54	Culture01_2889	57995	59611	750392862	phosphoenolpyruvate carboxykinase [ATP] [Nitrobacter sp. Nb-311A]
Culture01_2889_55	Culture01_2889	59769	60506	499632947	pyridoxamine 5'-phosphate oxidase [Nitrobacter winogradskyi]_x0001_
Culture01_2889_56	Culture01_2889	60717	61418	497484081	transcriptional regulator [Nitrobacter sp. Nb-311A]_x0001_
Culture01_2889_57	Culture01_2889	61487	63403	497484082	histidine kinase [Nitrobacter sp. Nb-311A]_x0001_
Culture01_2889_58	Culture01_2889	63400	63927	499828301	HPr kinase [Nitrobacter hamburgensis]_x0001_
Culture01_2889_59	Culture01_2889	64057	64458	488801189	MULTISPECIES: PTS fructose transporter subunit IIA [Afipia]_x0001_
Culture01_2889_60	Culture01_2889	64455	64796	85699348	phosphoryl transfer system, HPr [Nitrobacter sp. Nb-311A]
Culture01_2889_61	Culture01_2889	65047	66879	499828298	elongation factor 4 [Nitrobacter hamburgensis]_x0001_
Culture01_2889_62	Culture01_2889	67052	67411	497484087	plasmid stabilization protein [Nitrobacter sp. Nb-311A]_x0001_
Culture01_2889_63	Culture01_2889	67610	68572	74419409	murein endopeptidase, Metallo peptidase, MEROPS family M74 [Nitrobacter winogradskyi Nb-255]
Culture01_2889_64	Culture01_2889	68893	69717	85699352	molybdenum ABC transporter, periplasmic binding protein [Nitrobacter sp. Nb-311A]
Culture01_2889_65	Culture01_2889	70009	70704	499828295	molybdate ABC transporter permease [Nitrobacter hamburgensis]_x0001_
Culture01_2889_66	Culture01_2889	70707	71372	497484092	molybdenum ABC transporter ATP-binding protein [Nitrobacter sp. Nb-311A]_x0001_
Culture01_2889_67	Culture01_2889	71448	73241	85699356	cell volume regulation protein CvrA [Nitrobacter sp. Nb-311A]
Culture01_2889_68	Culture01_2889	73410	74234	497484094	methionine aminopeptidase [Nitrobacter sp. Nb-311A]_x0001_
Culture01_2889_69	Culture01_2889	74358	75068	497484095	hypothetical protein [Nitrobacter sp. Nb-311A]_x0001_
Culture01_2889_70	Culture01_2889	75149	75892	85699373	hypothetical protein NB311A_02994 [Nitrobacter sp. Nb-311A]
Culture01_2889_71	Culture01_2889	75892	76728	85699374	Binding-protein-dependent transport systems inner membrane component [Nitrobacter sp. Nb-311A]
Culture01_2889_72	Culture01_2889	76725	77471	91798942	ABC transporter related protein [Nitrobacter hamburgensis X14]
Culture01_2889_73	Culture01_2889	77544	78581	497484113	nitrate ABC transporter substrate-binding protein [Nitrobacter sp. Nb-311A]_x0001_
Culture01_2889_74	Culture01_2889	78815	79633	497484114	creatininase [Nitrobacter sp. Nb-311A]_x0001_
Culture01_2889_75	Culture01_2889	79952	81949	85699379	carbohydrate-selective porin OprB [Nitrobacter sp. Nb-311A]
Culture01_2889_76	Culture01_2889	81981	83222	499828281	ABC transporter permease [Nitrobacter hamburgensis]_x0001_
Culture01_2889_77	Culture01_2889	83328	83837	499828280	signal peptide protein [Nitrobacter hamburgensis]_x0001_
Culture01_2889_78	Culture01_2889	83901	86105	91798934	Amylo-alpha-1,6-glucosidase [Nitrobacter hamburgensis X14]
Culture01_2889_79	Culture01_2889	86177	87940	499828278	ABC transporter [Nitrobacter hamburgensis]_x0001_
Culture01_2889_80	Culture01_2889	88232	89299	499632924	glycosyl transferase [Nitrobacter winogradskyi]_x0001_
Culture01_2889_83	Culture01_2889	90198	90569	497484123	hypothetical protein [Nitrobacter sp. Nb-311A]_x0001_
Culture01_2889_84	Culture01_2889	90981	91640	85699388	hypothetical protein NB311A_03069 [Nitrobacter sp. Nb-311A]
Culture01_2889_85	Culture01_2889	92012	94729	497484125	aconitate hydratase [Nitrobacter sp. Nb-311A]_x0001_
Culture01_2889_86	Culture01_2889	94956	95324	499632920	cytochrome C biogenesis protein CcmA [Nitrobacter winogradskyi]_x0001_
Culture01_2926_3	Culture01_2926	1078	2049	653457163	metallophosphoesterase [Bradyrhizobium sp. URHA0002]
Culture01_2926_5	Culture01_2926	2384	2734	499634793	hypothetical protein [Nitrobacter winogradskyi]_x0001_
Culture01_2926_8	Culture01_2926	4044	4793	499828968	integrase [Nitrobacter hamburgensis]_x0001_
Culture01_2978_4	Culture01_2978	1191	1832	760158377	magnesium transporter [Roseomonas aerilata]
Culture01_2978_7	Culture01_2978	3278	3688	85695503	DNA-binding protein [Nitrobacter sp. Nb-311A]
Culture01_3007_1	Culture01_3007	281	1699	750392044	threonine synthase [Nitrobacter sp. Nb-311A]
Culture01_3007_2	Culture01_3007	1696	2985	497483125	peptidase M16 [Nitrobacter sp. Nb-311A]_x0001_
Culture01_3007_3	Culture01_3007	3022	3606	499828134	GCN5 family N-acetyltransferase [Nitrobacter hamburgensis]_x0001_
Culture01_3007_4	Culture01_3007	3739	4434	497483123	hypothetical protein [Nitrobacter sp. Nb-311A]_x0001_
Culture01_3007_5	Culture01_3007	4630	5115	497482144	F0F1 ATP synthase subunit B [Nitrobacter sp. Nb-311A]_x0001_
Culture01_3007_6	Culture01_3007	5123	5680	497482143	F0F1 ATP synthase subunit B' [Nitrobacter sp. Nb-311A]_x0001_
Culture01_3007_7	Culture01_3007	5744	5971	497482142	MULTISPECIES: F0F1 ATP synthase subunit C [Bradyrhizobiaceae]_x0001_
Culture01_3007_8	Culture01_3007	6029	6769	497482141	F0F1 ATP synthase subunit A [Nitrobacter sp. Nb-311A]_x0001_
Culture01_3007_10	Culture01_3007	7648	8175	497482139	hypothetical protein [Nitrobacter sp. Nb-311A]_x0001_
Culture01_3007_12	Culture01_3007	8400	9050	497482138	LuxR family transcriptional regulator [Nitrobacter sp. Nb-311A]_x0001_
Culture01_3007_13	Culture01_3007	9245	10474	497482137	5-aminolevulinate synthase [Nitrobacter sp. Nb-311A]_x0001_
Culture01_3007_14	Culture01_3007	10698	11723	497482136	biotin synthase [Nitrobacter sp. Nb-311A]_x0001_
Culture01_3046_2	Culture01_3046	192	1043	750392133	pantoate--beta-alanine ligase [Nitrobacter sp. Nb-311A]
Culture01_3046_3	Culture01_3046	1066	1503	752711853	lysophospholipase [Nitrobacter hamburgensis]
Culture01_3046_4	Culture01_3046	1530	2492	497483267	hypothetical protein [Nitrobacter sp. Nb-311A]_x0001_
Culture01_3046_6	Culture01_3046	3106	3762	497483265	glutathione S-transferase [Nitrobacter sp. Nb-311A]_x0001_
Culture01_3046_7	Culture01_3046	3830	4606	497483264	hypothetical protein [Nitrobacter sp. Nb-311A]_x0001_
Culture01_3046_8	Culture01_3046	4743	5012	497483263	hypothetical protein [Nitrobacter sp. Nb-311A]_x0001_
Culture01_3046_9	Culture01_3046	5021	5824	499830159	membrane protein [Nitrobacter hamburgensis]_x0001_
Culture01_3046_10	Culture01_3046	5912	6730	499830160	2,5-didehydrogluconate reductase [Nitrobacter hamburgensis]_x0001_
Culture01_3046_11	Culture01_3046	6825	7172	499830161	XRE family transcriptional regulator [Nitrobacter hamburgensis]_x0001_
Culture01_3046_12	Culture01_3046	7315	8079	91800849	polysaccharide deacetylase [Nitrobacter hamburgensis X14]
Culture01_3046_13	Culture01_3046	8273	9562	497483259	polysaccharide deacetylase [Nitrobacter sp. Nb-311A]_x0001_
Culture01_3046_15	Culture01_3046	10159	12894	497483257	DNA topoisomerase I [Nitrobacter sp. Nb-311A]_x0001_
Culture01_3054_2	Culture01_3054	438	707	497485587	hypothetical protein [Nitrobacter sp. Nb-311A]_x0001_
Culture01_3054_4	Culture01_3054	1389	2534	497485589	hypothetical protein [Nitrobacter sp. Nb-311A]_x0001_
Culture01_3054_5	Culture01_3054	3062	3412	497485591	hypothetical protein [Nitrobacter sp. Nb-311A]_x0001_
Culture01_3054_6	Culture01_3054	3430	3927	499634316	hypothetical protein [Nitrobacter winogradskyi]_x0001_
Culture01_3054_7	Culture01_3054	4048	5025	497485593	cysteine synthase [Nitrobacter sp. Nb-311A]_x0001_
Culture01_3054_9	Culture01_3054	5475	6608	497485595	queuine tRNA-ribosyltransferase [Nitrobacter sp. Nb-311A]_x0001_
Culture01_3054_10	Culture01_3054	6605	7687	91800209	Queuosine biosynthesis protein [Nitrobacter hamburgensis X14]
Culture01_3054_11	Culture01_3054	7902	8363	497485597	peptidyl-prolyl cis-trans isomerase [Nitrobacter sp. Nb-311A]_x0001_
Culture01_3054_12	Culture01_3054	8339	8767	91800207	conserved hypothetical protein [Nitrobacter hamburgensis X14]
Culture01_3054_13	Culture01_3054	8777	9337	499634321	peptidyl-prolyl cis-trans isomerase [Nitrobacter winogradskyi]_x0001_
Culture01_3054_14	Culture01_3054	9370	9867	499634322	phosphopantetheine adenylyltransferase [Nitrobacter winogradskyi]_x0001_
Culture01_3054_15	Culture01_3054	10190	10444	499634323	hypothetical protein [Nitrobacter winogradskyi]_x0001_
Culture01_3054_16	Culture01_3054	10536	12935	497485601	DNA gyrase subunit A [Nitrobacter sp. Nb-311A]_x0001_
Culture01_3108_4	Culture01_3108	1047	1439	499829567	cytochrome C oxidase subunit I [Nitrobacter hamburgensis]_x0001_
Culture01_3108_5	Culture01_3108	1436	1834	499634286	cytochrome C oxidase subunit I [Nitrobacter winogradskyi]_x0001_
Culture01_3108_6	Culture01_3108	1967	2365	652711068	hypothetical protein [Mesorhizobium loti]
Culture01_3108_7	Culture01_3108	2614	2985	410893582	hypothetical protein HMPREF9695_00464 [Afipia broomeae ATCC 49717]
Culture01_3108_9	Culture01_3108	3259	3600	654707770	hypothetical protein [Bradyrhizobium elkanii]
Culture01_3108_11	Culture01_3108	4065	4475	653552294	hypothetical protein [Bradyrhizobium sp. Ai1a-2]
Culture01_3108_12	Culture01_3108	4555	5931	544641795	alpha-ketoglutarate-dependent 2,4-dichlorophenoxyacetate dioxygenase [Bradyrhizobium sp. DFCI-1]_x0001_
Culture01_3108_16	Culture01_3108	6989	7456	497482674	hypothetical protein [Nitrobacter sp. Nb-311A]_x0001_
Culture01_3108_17	Culture01_3108	7453	7671	497483469	resolvase [Nitrobacter sp. Nb-311A]_x0001_
Culture01_3117_2	Culture01_3117	195	2399	750391952	aldehyde oxidase [Nitrobacter sp. Nb-311A]
Culture01_3117_4	Culture01_3117	3051	4646	499633245	beta-lactamase [Nitrobacter winogradskyi]_x0001_
Culture01_3117_6	Culture01_3117	5311	9621	499828678	hypothetical protein [Nitrobacter hamburgensis]_x0001_
Culture01_3117_10	Culture01_3117	11507	12301	497482980	diguanylate cyclase [Nitrobacter sp. Nb-311A]_x0001_
Culture01_3117_11	Culture01_3117	12842	14077	496254052	sugar transporter [Bradyrhizobium sp. STM 3843]_x0001_
Culture01_3117_12	Culture01_3117	14275	15546	499828746	fumarylacetoacetase [Nitrobacter hamburgensis]_x0001_
Culture01_3117_14	Culture01_3117	15860	17485	499828744	FAD-dependent oxidoreductase [Nitrobacter hamburgensis]_x0001_
Culture01_3117_16	Culture01_3117	17692	18675	499828742	beta lactamase [Nitrobacter hamburgensis]_x0001_
Culture01_3117_17	Culture01_3117	18680	20026	499828741	homogentisate 1,2-dioxygenase [Nitrobacter hamburgensis]_x0001_
Culture01_3117_18	Culture01_3117	20041	20685	499828740	maleylacetoacetate isomerase [Nitrobacter hamburgensis]_x0001_
Culture01_3117_19	Culture01_3117	20839	22605	737028761	MULTISPECIES: diguanylate cyclase, partial [Proteobacteria]
Culture01_3117_20	Culture01_3117	22813	23106	499828826	hypothetical protein [Nitrobacter hamburgensis]_x0001_
Culture01_3117_21	Culture01_3117	23099	23668	91799488	GCN5-related N-acetyltransferase [Nitrobacter hamburgensis X14]
Culture01_3117_22	Culture01_3117	23661	24203	499828824	phage tail Collar [Nitrobacter hamburgensis]_x0001_
Culture01_3117_23	Culture01_3117	24244	24774	499828823	phage tail Collar [Nitrobacter hamburgensis]_x0001_
Culture01_3117_24	Culture01_3117	24806	25336	499828822	phage tail Collar [Nitrobacter hamburgensis]_x0001_
Culture01_3117_25	Culture01_3117	25645	29643	752711670	hypothetical protein, partial [Nitrobacter hamburgensis]
Culture01_3117_27	Culture01_3117	30286	31536	518000740	hypothetical protein [Pseudaminobacter salicylatoxidans]
Culture01_3117_28	Culture01_3117	31541	32035	518000739	dCMP deaminase [Pseudaminobacter salicylatoxidans]
Culture01_3117_29	Culture01_3117	32050	32721	737036238	MULTISPECIES: ankyrin [Proteobacteria]_x0001_
Culture01_3117_30	Culture01_3117	32900	33751	685110427	conserved hypothetical protein [Mesorhizobium plurifarium]
Culture01_3117_31	Culture01_3117	33852	34781	499828853	LysR family transcriptional regulator [Nitrobacter hamburgensis]_x0001_
Culture01_3117_32	Culture01_3117	34905	35984	499828562	1,2-oxophytodienoate reductase [Nitrobacter hamburgensis]_x0001_
Culture01_3117_34	Culture01_3117	36420	36779	91799213	conserved hypothetical protein [Nitrobacter hamburgensis X14]
Culture01_3117_35	Culture01_3117	36883	37335	515795339	extradiol dioxygenase [Cupriavidus basilensis]
Culture01_3117_37	Culture01_3117	37573	40746	499828565	transporter [Nitrobacter hamburgensis]_x0001_
Culture01_3117_38	Culture01_3117	40778	41926	499828564	hemolysin secretion protein D [Nitrobacter hamburgensis]_x0001_
Culture01_3117_39	Culture01_3117	42656	44128	499634658	porin [Nitrobacter winogradskyi]_x0001_
Culture01_3117_40	Culture01_3117	44674	45675	497483897	AraC family transcriptional regulator [Nitrobacter sp. Nb-311A]_x0001_
Culture01_3117_41	Culture01_3117	45886	46731	497483898	SAM-dependent methlyltransferase [Nitrobacter sp. Nb-311A]_x0001_
Culture01_3128_2	Culture01_3128	70	1203	497485273	glycosyl transferase [Nitrobacter sp. Nb-311A]_x0001_
Culture01_3128_3	Culture01_3128	1311	2843	497485274	UDP-phosphate glucose phosphotransferase [Nitrobacter sp. Nb-311A]_x0001_
Culture01_3128_4	Culture01_3128	2877	4142	497485275	hypothetical protein [Nitrobacter sp. Nb-311A]_x0001_
Culture01_3128_5	Culture01_3128	4273	4767	505272929	hypothetical protein [Sphingomonas sp. MM-1]_x0001_
Culture01_3128_6	Culture01_3128	4961	6142	499633946	saccharopine dehydrogenase [Nitrobacter winogradskyi]_x0001_
Culture01_3128_7	Culture01_3128	6421	7260	497485278	probable site-specific integrase/recombinase [Nitrobacter sp. Nb-311A]_x0001_
Culture01_3128_8	Culture01_3128	7077	8372	653549165	peptidase [Bradyrhizobium sp. Ai1a-2]
Culture01_3128_9	Culture01_3128	8387	10876	85698169	probable tonB-dependent receptor protein [Nitrobacter sp. Nb-311A]
Culture01_3128_10	Culture01_3128	10990	11991	640412535	iron dicitrate transport regulator FecR [Ochrobactrum rhizosphaerae]
Culture01_3128_11	Culture01_3128	12050	12553	498346269	RNA polymerase subunit sigma-24 [Ochrobactrum anthropi]
Culture01_3128_13	Culture01_3128	14178	14774	497485300	MerR family transcripitonal regulator [Nitrobacter sp. Nb-311A]_x0001_
Culture01_3128_14	Culture01_3128	14813	15133	85696944	integration host factor, alpha subunit [Nitrobacter sp. Nb-311A]
Culture01_3128_15	Culture01_3128	15262	16239	750393651	3-oxoacyl-ACP synthase [Nitrobacter sp. Nb-311A]
Culture01_3128_16	Culture01_3128	16236	17297	499829358	phosphate acyltransferase [Nitrobacter hamburgensis]_x0001_
Culture01_3128_17	Culture01_3128	17540	18127	497485304	phosphodiesterase [Nitrobacter sp. Nb-311A]_x0001_
Culture01_3128_18	Culture01_3128	18138	18677	497485305	ubiquinol-cytochrome C chaperone [Nitrobacter sp. Nb-311A]_x0001_
Culture01_3128_19	Culture01_3128	18783	19256	497485306	membrane protein SmpA [Nitrobacter sp. Nb-311A]_x0001_
Culture01_3128_20	Culture01_3128	19302	20729	499829039	membrane protein [Nitrobacter hamburgensis]_x0001_
Culture01_3128_21	Culture01_3128	20929	22461	91800025	propionyl-CoA carboxylase carboxyltransferase subunit [Nitrobacter hamburgensis X14]
Culture01_3128_22	Culture01_3128	22560	22829	499829351	type III secretion protein [Nitrobacter hamburgensis]_x0001_
Culture01_3128_23	Culture01_3128	22826	24490	499633935	hypothetical protein [Nitrobacter winogradskyi]_x0001_
Culture01_3128_24	Culture01_3128	24539	25324	497482908	ATPase [Nitrobacter sp. Nb-311A]_x0001_
Culture01_3128_25	Culture01_3128	25375	26628	750391965	membrane protein [Nitrobacter sp. Nb-311A]
Culture01_3128_26	Culture01_3128	26802	27539	752698012	hypothetical protein [Nitrobacter winogradskyi]
Culture01_3128_27	Culture01_3128	27606	28937	499633930	ATPase AAA [Nitrobacter winogradskyi]_x0001_
Culture01_3128_28	Culture01_3128	28934	30328	85698018	peptidase S1C, Do [Nitrobacter sp. Nb-311A]
Culture01_3128_29	Culture01_3128	30790	31203	497482914	50S ribosomal protein L17 [Nitrobacter sp. Nb-311A]_x0001_
Culture01_3128_30	Culture01_3128	31321	32352	497482915	DNA-directed RNA polymerase subunit alpha [Nitrobacter sp. Nb-311A]_x0001_
Culture01_3128_31	Culture01_3128	32449	32838	492881134	MULTISPECIES: 30S ribosomal protein S11 [Bacteria]_x0001_
Culture01_3128_32	Culture01_3128	32947	33315	497482917	MULTISPECIES: 30S ribosomal protein S13 [Nitrobacter]_x0001_
Culture01_3128_33	Culture01_3128	33635	34255	85698024	adenylate kinase [Nitrobacter sp. Nb-311A]
Culture01_3128_34	Culture01_3128	34594	35925	497482920	preprotein translocase subunit SecY [Nitrobacter sp. Nb-311A]_x0001_
Culture01_3128_35	Culture01_3128	36076	36561	499829338	50S ribosomal protein L15 [Nitrobacter hamburgensis]_x0001_
Culture01_3128_37	Culture01_3128	36955	37530	497482923	30S ribosomal protein S5 [Nitrobacter sp. Nb-311A]_x0001_
Culture01_3128_38	Culture01_3128	37642	38004	497482924	50S ribosomal protein L18 [Nitrobacter sp. Nb-311A]_x0001_
Culture01_3128_39	Culture01_3128	38016	38549	499633919	50S ribosomal protein L6 [Nitrobacter winogradskyi]_x0001_
Culture01_3128_40	Culture01_3128	38565	38963	497482926	30S ribosomal protein S8 [Nitrobacter sp. Nb-311A]_x0001_
Culture01_3128_41	Culture01_3128	38977	39282	497482927	30S ribosomal protein S14 [Nitrobacter sp. Nb-311A]_x0001_
Culture01_3128_42	Culture01_3128	39326	39883	497482928	50S ribosomal protein L5 [Nitrobacter sp. Nb-311A]_x0001_
Culture01_3128_43	Culture01_3128	39876	40190	497482929	50S ribosomal protein L24 [Nitrobacter sp. Nb-311A]_x0001_
Culture01_3128_44	Culture01_3128	40190	40558	497482930	MULTISPECIES: 50S ribosomal protein L14 [Nitrobacter]_x0001_
Culture01_3128_45	Culture01_3128	40598	40846	497482931	MULTISPECIES: 30S ribosomal protein S17 [Bradyrhizobiaceae]_x0001_
Culture01_3128_47	Culture01_3128	41069	41482	499633912	50S ribosomal protein L16 [Nitrobacter winogradskyi]_x0001_
Culture01_3128_48	Culture01_3128	41510	42205	497482934	30S ribosomal protein S3 [Nitrobacter sp. Nb-311A]_x0001_
Culture01_3128_49	Culture01_3128	42225	42611	497482935	MULTISPECIES: 50S ribosomal protein L22 [Nitrobacter]_x0001_
Culture01_3128_50	Culture01_3128	42621	42899	497482936	MULTISPECIES: 30S ribosomal protein S19 [Nitrobacter]_x0001_
Culture01_3128_51	Culture01_3128	42915	43748	499633910	50S ribosomal protein L2 [Nitrobacter winogradskyi]_x0001_
Culture01_3128_52	Culture01_3128	43777	44073	499829322	50S ribosomal protein L23 [Nitrobacter hamburgensis]_x0001_
Culture01_3128_53	Culture01_3128	44070	44690	497482939	50S ribosomal protein L4 [Nitrobacter sp. Nb-311A]_x0001_
Culture01_3128_54	Culture01_3128	44692	45432	497482940	50S ribosomal protein L3 [Nitrobacter sp. Nb-311A]_x0001_
Culture01_3128_55	Culture01_3128	45535	45843	488799896	MULTISPECIES: 30S ribosomal protein S10 [Bacteria]_x0001_
Culture01_3132_1	Culture01_3132	2	1150	499830024	replicative DNA helicase [Nitrobacter hamburgensis]_x0001_
Culture01_3132_2	Culture01_3132	1414	2664	85696757	cyclopropane-fatty-acyl-phospholipid synthase [Nitrobacter sp. Nb-311A]
Culture01_3132_3	Culture01_3132	2931	4196	91800703	conserved hypothetical protein [Nitrobacter hamburgensis X14]
Culture01_3132_4	Culture01_3132	4250	5368	497485919	DNA processing protein DprA [Nitrobacter sp. Nb-311A]_x0001_
Culture01_3132_5	Culture01_3132	5561	6157	497485920	glycerol-3-phosphate acyltransferase [Nitrobacter sp. Nb-311A]_x0001_
Culture01_3132_6	Culture01_3132	6319	7620	499634519	dihydroorotase [Nitrobacter winogradskyi]_x0001_
Culture01_3132_7	Culture01_3132	7690	8643	497485922	aspartate carbamoyltransferase [Nitrobacter sp. Nb-311A]_x0001_
Culture01_3132_8	Culture01_3132	8817	10457	497485923	acyl-CoA dehydrogenase [Nitrobacter sp. Nb-311A]_x0001_
Culture01_3132_9	Culture01_3132	10472	11266	85696765	Abortive infection protein [Nitrobacter sp. Nb-311A]
Culture01_3132_10	Culture01_3132	11257	11757	497485925	Holliday junction resolvase [Nitrobacter sp. Nb-311A]_x0001_
Culture01_3132_11	Culture01_3132	11889	12209	497485926	glutamyl-tRNA amidotransferase subunit C [Nitrobacter sp. Nb-311A]_x0001_
Culture01_3132_13	Culture01_3132	12427	13905	497485928	glutamyl-tRNA(Gln) amidotransferase [Nitrobacter sp. Nb-311A]_x0001_
Culture01_3132_14	Culture01_3132	13902	14204	497485929	hypothetical protein [Nitrobacter sp. Nb-311A]_x0001_
Culture01_3132_15	Culture01_3132	14365	15744	499634510	patatin [Nitrobacter winogradskyi]_x0001_
Culture01_3132_16	Culture01_3132	15810	17294	497485931	glutamyl-tRNA amidotransferase subunit B [Nitrobacter sp. Nb-311A]_x0001_
Culture01_3132_18	Culture01_3132	18944	19210	497485933	hypothetical protein [Nitrobacter sp. Nb-311A]_x0001_
Culture01_3132_19	Culture01_3132	20057	20350	497482904	hypothetical protein [Nitrobacter sp. Nb-311A]_x0001_
Culture01_3132_20	Culture01_3132	20559	22259	750391998	oxidoreductase [Nitrobacter sp. Nb-311A]
Culture01_3132_21	Culture01_3132	22265	23023	750391997	hypothetical protein [Nitrobacter sp. Nb-311A]
Culture01_3132_22	Culture01_3132	23008	26121	85698007	hypothetical protein NB311A_00870 [Nitrobacter sp. Nb-311A]
Culture01_3132_23	Culture01_3132	26118	26444	497482900	hypothetical protein [Nitrobacter sp. Nb-311A]_x0001_
Culture01_3134_1	Culture01_3134	2	1171	74420973	Mn2+ and Fe2+ transporters of the NRAMP family [Nitrobacter winogradskyi Nb-255]
Culture01_3134_2	Culture01_3134	1261	1989	763893476	hypothetical protein UB31_05025 [Bradyrhizobium sp. LTSP849]
Culture01_3134_3	Culture01_3134	2091	2864	497485936	arginyl-tRNA-protein transferase [Nitrobacter sp. Nb-311A]_x0001_
Culture01_3134_4	Culture01_3134	2945	3487	85696779	hypothetical protein NB311A_02476 [Nitrobacter sp. Nb-311A]
Culture01_3134_5	Culture01_3134	3618	4802	85696780	delta-aminolevulinic acid dehydratase [Nitrobacter sp. Nb-311A]
Culture01_3134_6	Culture01_3134	4892	5311	85696781	hypothetical protein NB311A_02486 [Nitrobacter sp. Nb-311A]
Culture01_3134_7	Culture01_3134	5748	6260	74420968	transcriptional regulator, MarR family [Nitrobacter winogradskyi Nb-255]
Culture01_3134_8	Culture01_3134	6504	6806	497485942	antibiotic biosynthesis monooxygenase [Nitrobacter sp. Nb-311A]_x0001_
Culture01_3134_9	Culture01_3134	6908	8038	497485943	transporter [Nitrobacter sp. Nb-311A]_x0001_
Culture01_3134_10	Culture01_3134	8199	9608	499634426	glutamine synthetase [Nitrobacter winogradskyi]_x0001_
Culture01_3134_11	Culture01_3134	9699	10037	499634425	nitrogen regulatory protein P-II 1 [Nitrobacter winogradskyi]_x0001_
Culture01_3134_12	Culture01_3134	10381	11880	497485946	hypothetical protein [Nitrobacter sp. Nb-311A]_x0001_
Culture01_3134_13	Culture01_3134	11885	13096	497485947	multicopper oxidase [Nitrobacter sp. Nb-311A]_x0001_
Culture01_3134_14	Culture01_3134	13739	15094	497485948	trigger factor [Nitrobacter sp. Nb-311A]_x0001_
Culture01_3134_15	Culture01_3134	15363	15998	497485949	ATP-dependent Clp protease proteolytic subunit [Nitrobacter sp. Nb-311A]_x0001_
Culture01_3134_16	Culture01_3134	16448	17722	750394073	hypothetical protein [Nitrobacter sp. Nb-311A]
Culture01_3134_17	Culture01_3134	18045	20474	497485951	peptidase [Nitrobacter sp. Nb-311A]_x0001_
Culture01_3134_18	Culture01_3134	20831	21049	85696793	hypothetical protein NB311A_02546 [Nitrobacter sp. Nb-311A]
Culture01_3134_19	Culture01_3134	21242	22099	499634418	methyltransferase [Nitrobacter winogradskyi]_x0001_
Culture01_3134_20	Culture01_3134	22165	22476	497485954	hypothetical protein [Nitrobacter sp. Nb-311A]_x0001_
Culture01_3134_21	Culture01_3134	22610	23863	499829959	peptidase T [Nitrobacter hamburgensis]_x0001_
Culture01_3134_22	Culture01_3134	23992	24291	85696798	Histone-like DNA-binding protein [Nitrobacter sp. Nb-311A]
Culture01_3134_24	Culture01_3134	25210	25575	497485686	NADH:ubiquinone oxidoreductase subunit A [Nitrobacter sp. Nb-311A]_x0001_
Culture01_3134_25	Culture01_3134	25566	26168	497485685	NADH dehydrogenase subunit B [Nitrobacter sp. Nb-311A]_x0001_
Culture01_3134_26	Culture01_3134	26180	26662	499634408	NADH dehydrogenase subunit C [Nitrobacter winogradskyi]_x0001_
Culture01_3145_1	Culture01_3145	780	1775	85696399	hypothetical protein NB311A_10418 [Nitrobacter sp. Nb-311A]
Culture01_3145_5	Culture01_3145	3483	4388	497483662	RND transporter [Nitrobacter sp. Nb-311A]_x0001_
Culture01_3145_6	Culture01_3145	4617	5492	750392360	peptidase [Nitrobacter sp. Nb-311A]
Culture01_3145_7	Culture01_3145	5865	7598	497483660	hypothetical protein [Nitrobacter sp. Nb-311A]_x0001_
Culture01_3145_11	Culture01_3145	10728	12212	497484062	ATPase [Nitrobacter sp. Nb-311A]_x0001_
Culture01_3145_12	Culture01_3145	12689	13024	499635505	ribonuclease P [Nitrobacter winogradskyi]_x0001_
Culture01_3145_13	Culture01_3145	13097	14929	497484059	insertase [Nitrobacter sp. Nb-311A]_x0001_
Culture01_3145_14	Culture01_3145	15070	15723	499831333	GTP-binding protein YsxC [Nitrobacter hamburgensis]_x0001_
Culture01_3145_15	Culture01_3145	15720	16121	499831332	membrane protein [Nitrobacter hamburgensis]_x0001_
Culture01_3145_16	Culture01_3145	16209	17105	497484056	acetylglutamate kinase [Nitrobacter sp. Nb-311A]_x0001_
Culture01_3145_17	Culture01_3145	17102	17815	499635500	HAD family hydrolase [Nitrobacter winogradskyi]_x0001_
Culture01_3145_18	Culture01_3145	17889	18734	499831329	2,3,4,5-tetrahydropyridine-2,6-carboxylate N-succinyltransferase [Nitrobacter hamburgensis]_x0001_
Culture01_3145_19	Culture01_3145	18734	19903	497484053	succinyl-diaminopimelate desuccinylase [Nitrobacter sp. Nb-311A]_x0001_
Culture01_3145_20	Culture01_3145	19900	20460	497484052	5'-methylthioadenosine nucleosidase [Nitrobacter sp. Nb-311A]_x0001_
Culture01_3145_21	Culture01_3145	20457	21194	497484452	tRNA pseudouridine synthase A [Nitrobacter sp. Nb-311A]_x0001_
Culture01_3145_22	Culture01_3145	21194	22105	497484453	methionyl-tRNA formyltransferase [Nitrobacter sp. Nb-311A]_x0001_
Culture01_3145_23	Culture01_3145	22159	22686	497484454	peptide deformylase [Nitrobacter sp. Nb-311A]_x0001_
Culture01_3145_24	Culture01_3145	22784	24049	497484455	DNA recombinase [Nitrobacter sp. Nb-311A]_x0001_
Culture01_3145_25	Culture01_3145	24089	25444	499831323	MFS transporter [Nitrobacter hamburgensis]_x0001_
Culture01_3145_26	Culture01_3145	25509	26375	499635492	membrane protein [Nitrobacter winogradskyi]_x0001_
Culture01_3145_27	Culture01_3145	26441	27166	497484458	acetoacetyl-CoA reductase [Nitrobacter sp. Nb-311A]_x0001_
Culture01_3145_28	Culture01_3145	27369	28547	499635490	acetyl-CoA acetyltransferase [Nitrobacter winogradskyi]_x0001_
Culture01_3145_29	Culture01_3145	28866	29462	497484460	polyhydroxyalkanoate synthesis repressor PhaR [Nitrobacter sp. Nb-311A]_x0001_
Culture01_3145_30	Culture01_3145	29915	31981	91802038	histidine kinase [Nitrobacter hamburgensis X14]
Culture01_3145_31	Culture01_3145	31951	33693	497482176	histidine kinase [Nitrobacter sp. Nb-311A]_x0001_
Culture01_3145_32	Culture01_3145	33749	34429	497482175	chemotaxis protein CheY [Nitrobacter sp. Nb-311A]_x0001_
Culture01_3145_33	Culture01_3145	34694	35305	497482168	RNA polymerase sigma factor [Nitrobacter sp. Nb-311A]_x0001_
Culture01_3145_34	Culture01_3145	35577	38582	497482167	pyrroline-5-carboxylate dehydrogenase [Nitrobacter sp. Nb-311A]_x0001_
Culture01_3145_35	Culture01_3145	38825	39493	750391741	hypothetical protein [Nitrobacter sp. Nb-311A]
Culture01_3145_37	Culture01_3145	40123	40455	499635457	sulfite:cytochrome C oxidoreductase subunit B [Nitrobacter winogradskyi]_x0001_
Culture01_3145_38	Culture01_3145	40467	41669	497482162	oxidase [Nitrobacter sp. Nb-311A]_x0001_
Culture01_3145_39	Culture01_3145	41904	42164	91801748	hypothetical protein Nham_3393 [Nitrobacter hamburgensis X14]
Culture01_3145_40	Culture01_3145	42505	44178	74422072	conserved hypothetical protein [Nitrobacter winogradskyi Nb-255]
Culture01_3145_41	Culture01_3145	44234	45280	497482160	membrane protein [Nitrobacter sp. Nb-311A]_x0001_
Culture01_3145_42	Culture01_3145	45277	46746	497482159	YcjX-like protein [Nitrobacter sp. Nb-311A]_x0001_
Culture01_3145_43	Culture01_3145	47236	48717	85699008	methyl-accepting chemotaxis receptor/sensory transducer [Nitrobacter sp. Nb-311A]
Culture01_3145_44	Culture01_3145	48831	50006	85699007	Acyl-CoA dehydrogenase [Nitrobacter sp. Nb-311A]
Culture01_3145_45	Culture01_3145	50219	50785	497482155	hypothetical protein [Nitrobacter sp. Nb-311A]_x0001_
Culture01_3145_46	Culture01_3145	51016	51384	497482154	hypothetical protein [Nitrobacter sp. Nb-311A]_x0001_
Culture01_3153_2	Culture01_3153	603	1043	656039958	transposase [Bradyrhizobium sp. th.b2]
Culture01_3153_8	Culture01_3153	4747	7080	499828847	RNA-binding protein [Nitrobacter hamburgensis]_x0001_
Culture01_3153_12	Culture01_3153	9972	10307	654724743	MULTISPECIES: signal peptide protein [Bradyrhizobium]
Culture01_3153_13	Culture01_3153	10722	11744	742490357	alcohol dehydrogenase [Bradyrhizobium japonicum]
Culture01_3153_15	Culture01_3153	13301	13822	499828693	N-acetyltransferase GCN5 [Nitrobacter hamburgensis]_x0001_
Culture01_3153_16	Culture01_3153	14500	15471	91799355	Phosphate butyryltransferase [Nitrobacter hamburgensis X14]
Culture01_3153_17	Culture01_3153	15786	18056	499828717	formate acetyltransferase [Nitrobacter hamburgensis]_x0001_
Culture01_3153_18	Culture01_3153	18070	18897	499828718	pyruvate formate lyase-activating protein [Nitrobacter hamburgensis]_x0001_
Culture01_3153_19	Culture01_3153	18949	21042	762182780	glycogen operon protein [Candidatus Brocadia sinica JPN1]
Culture01_3153_20	Culture01_3153	21057	23579	500472679	glycogen phosphorylase [Geobacter uraniireducens]_x0001_
Culture01_3153_21	Culture01_3153	23758	26148	654706165	kojibiose phosphorylase [Bradyrhizobium elkanii]
Culture01_3153_22	Culture01_3153	26184	26936	654706164	hypothetical protein [Bradyrhizobium elkanii]
Culture01_3153_23	Culture01_3153	27079	29484	750391913	phosphoketolase [Nitrobacter sp. Nb-311A]
Culture01_3153_25	Culture01_3153	29850	30365	639179374	hypothetical protein [Bradyrhizobium sp. Tv2a-2]
Culture01_3153_26	Culture01_3153	30650	31309	504310188	hypothetical protein [Bradyrhizobium japonicum]_x0001_
Culture01_3153_27	Culture01_3153	32224	32847	750392266	luciferase [Nitrobacter sp. Nb-311A]
Culture01_3153_28	Culture01_3153	32893	33312	499828773	luciferase [Nitrobacter hamburgensis]_x0001_
Culture01_3153_29	Culture01_3153	33371	35731	499634575	TonB-denpendent receptor [Nitrobacter winogradskyi]_x0001_
Culture01_3153_30	Culture01_3153	36044	36916	750392246	ABC transporter substrate-binding protein [Nitrobacter sp. Nb-311A]
Culture01_3153_31	Culture01_3153	37081	37911	497483513	ABC transporter [Nitrobacter sp. Nb-311A]_x0001_
Culture01_3153_32	Culture01_3153	37908	38906	497483512	ABC transporter permease [Nitrobacter sp. Nb-311A]_x0001_
Culture01_3153_33	Culture01_3153	39545	40087	685097632	Lysine exporter protein LysE/YggA [Mesorhizobium plurifarium]
Culture01_3153_34	Culture01_3153	40231	40503	516739816	hypothetical protein [Novosphingobium nitrogenifigens]
Culture01_3153_35	Culture01_3153	40635	41111	750435970	transposase [Novosphingobium tardaugens]
Culture01_3153_38	Culture01_3153	42685	43053	497483959	cupin [Nitrobacter sp. Nb-311A]_x0001_
Culture01_3153_39	Culture01_3153	43173	44867	499828855	methyl-accepting chemotaxis protein [Nitrobacter hamburgensis]_x0001_
Culture01_3153_42	Culture01_3153	48589	49089	656045654	membrane protein [Bradyrhizobium sp. th.b2]
Culture01_3153_43	Culture01_3153	49363	52563	654894787	hypothetical protein [Bradyrhizobium elkanii]
Culture01_3153_44	Culture01_3153	52747	53865	765025665	hypothetical protein, partial [Bradyrhizobium sp. LTSPM299]
Culture01_3170_1	Culture01_3170	494	4105	497482650	membrane protein [Nitrobacter sp. Nb-311A]_x0001_
Culture01_3170_2	Culture01_3170	4208	4540	85698581	protein related to arylsulfate sulfotransferase involved in siderophore biosynthesis [Nitrobacter sp. Nb-311A]
Culture01_3170_3	Culture01_3170	4850	5104	499634839	arylsulfate sulfotransferase [Nitrobacter winogradskyi]_x0001_
Culture01_3170_5	Culture01_3170	5528	6937	497482654	fumarate hydratase [Nitrobacter sp. Nb-311A]_x0001_
Culture01_3170_6	Culture01_3170	7025	7576	497482655	hypothetical protein [Nitrobacter sp. Nb-311A]_x0001_
Culture01_3170_7	Culture01_3170	8154	9014	499634835	thymidylate synthase [Nitrobacter winogradskyi]_x0001_
Culture01_3170_8	Culture01_3170	9011	9544	499634834	diacylglycerol kinase [Nitrobacter winogradskyi]_x0001_
Culture01_3170_9	Culture01_3170	9701	10846	497482658	membrane protein [Nitrobacter sp. Nb-311A]_x0001_
Culture01_3170_10	Culture01_3170	10843	11739	499634832	membrane protein [Nitrobacter winogradskyi]_x0001_
Culture01_3170_12	Culture01_3170	12362	13852	497482661	serine protease [Nitrobacter sp. Nb-311A]_x0001_
Culture01_3170_13	Culture01_3170	13973	14866	499634829	phosphoserine phosphatase [Nitrobacter winogradskyi]_x0001_
Culture01_3170_14	Culture01_3170	14913	15797	497482663	tRNA delta(2)-isopentenylpyrophosphate transferase [Nitrobacter sp. Nb-311A]_x0001_
Culture01_3170_15	Culture01_3170	16106	17884	85698594	acetolactate synthase III large subunit [Nitrobacter sp. Nb-311A]
Culture01_3170_16	Culture01_3170	18051	18593	497482665	acetolactate synthase [Nitrobacter sp. Nb-311A]_x0001_
Culture01_3170_17	Culture01_3170	18598	19299	497482666	S-adenosyl-L-methionine (SAM)-dependent methyltransferase [Nitrobacter sp. Nb-311A]_x0001_
Culture01_3170_18	Culture01_3170	19450	20469	499634825	ketol-acid reductoisomerase [Nitrobacter winogradskyi]_x0001_
Culture01_3170_19	Culture01_3170	20622	22181	499634824	ABC transporter permease [Nitrobacter winogradskyi]_x0001_
Culture01_3170_20	Culture01_3170	22178	22984	497482669	ABC transporter ATP-binding protein [Nitrobacter sp. Nb-311A]_x0001_
Culture01_3170_21	Culture01_3170	23229	24245	91801120	Polyphosphate:AMP phosphotransferase [Nitrobacter hamburgensis X14]
Culture01_3170_23	Culture01_3170	24618	26177	499830426	2-isopropylmalate synthase [Nitrobacter hamburgensis]_x0001_
Culture01_3170_24	Culture01_3170	26360	26956	497482672	hypothetical protein [Nitrobacter sp. Nb-311A]_x0001_
Culture01_3170_26	Culture01_3170	28591	30081	754563935	signal peptide protein [Bradyrhizobium japonicum]_x0001_
Culture01_3170_27	Culture01_3170	30245	31804	359505599	hypothetical protein SM0020_10595 [Sinorhizobium meliloti CCNWSX0020]
Culture01_3170_28	Culture01_3170	31942	32451	398229693	hypothetical protein PMI42_00784 [Bradyrhizobium sp. YR681]
Culture01_3170_31	Culture01_3170	33331	34023	499634820	recombinase [Nitrobacter winogradskyi]_x0001_
Culture01_3316_1	Culture01_3316	2	1177	497483453	chromate transporter [Nitrobacter sp. Nb-311A]_x0001_
Culture01_3316_2	Culture01_3316	1174	2034	85697450	superoxide dismutase SodM-like protein [Nitrobacter sp. Nb-311A]
Culture01_3316_3	Culture01_3316	2184	2435	497483845	transposase [Nitrobacter sp. Nb-311A]_x0001_
Culture01_3316_4	Culture01_3316	2485	3693	739235234	MFS transporter [Rhizobium sp. OK665]
Culture01_3316_5	Culture01_3316	3854	4189	499635547	arsenic transporter [Nitrobacter winogradskyi]_x0001_
Culture01_3316_6	Culture01_3316	4265	7396	497483224	acriflavine resistance protein B [Nitrobacter sp. Nb-311A]_x0001_
Culture01_3316_7	Culture01_3316	7398	8546	750392103	RND transporter [Nitrobacter sp. Nb-311A]
Culture01_3335_1	Culture01_3335	3	1541	499827947	phenylalanyl-tRNA synthetase subunit beta [Nitrobacter hamburgensis]_x0001_
Culture01_3335_2	Culture01_3335	1593	2261	497482407	ATPase [Nitrobacter sp. Nb-311A]_x0001_
Culture01_3335_3	Culture01_3335	2258	3694	750391768	amine oxidase [Nitrobacter sp. Nb-311A]
Culture01_3335_4	Culture01_3335	4034	4798	91798596	conserved hypothetical protein [Nitrobacter hamburgensis X14]
Culture01_3351_1	Culture01_3351	375	1604	651323076	hypothetical protein [Acidobacteriaceae bacterium URHE0068]
Culture01_3373_2	Culture01_3373	236	1852	737753966	hypothetical protein, partial [Bradyrhizobium sp. ARR65]
Culture01_3373_6	Culture01_3373	3576	5573	517843399	hypothetical protein [Elioraea tepidiphila]
Culture01_3373_7	Culture01_3373	5848	6321	518747799	50S ribosomal protein L21 [Methylobacterium sp. 77]
Culture01_3373_8	Culture01_3373	6558	7415	764970801	hypothetical protein [Bradyrhizobium sp. LTSP885]_x0001_
Culture01_3373_11	Culture01_3373	8769	9908	497482786	membrane protein [Nitrobacter sp. Nb-311A]_x0001_
Culture01_3373_13	Culture01_3373	10490	10951	497483457	hypothetical protein [Nitrobacter sp. Nb-311A]_x0001_
Culture01_3373_14	Culture01_3373	11044	11730	497484906	Fe(II)-dependent oxygenase [Nitrobacter sp. Nb-311A]_x0001_
Culture01_3373_15	Culture01_3373	11812	12840	497484907	TonB-denpendent receptor [Nitrobacter sp. Nb-311A]_x0001_
Culture01_3378_1	Culture01_3378	46	498	750391744	heat-shock protein [Nitrobacter sp. Nb-311A]
Culture01_3378_3	Culture01_3378	1196	1678	497482187	molecular chaperone Hsp20 [Nitrobacter sp. Nb-311A]_x0001_
Culture01_3378_4	Culture01_3378	1769	2275	499635381	molecular chaperone Hsp20 [Nitrobacter winogradskyi]_x0001_
Culture01_3378_7	Culture01_3378	3166	4290	497482192	peptidase [Nitrobacter sp. Nb-311A]_x0001_
Culture01_3378_8	Culture01_3378	4613	6241	653008800	membrane protein [Sedimentitalea nanhaiensis]
Culture01_3378_9	Culture01_3378	7006	9051	85695764	hypothetical protein NB311A_09911 [Nitrobacter sp. Nb-311A]
Culture01_3378_10	Culture01_3378	9071	10582	497483831	circadian clock protein KaiC [Nitrobacter sp. Nb-311A]_x0001_
Culture01_3378_11	Culture01_3378	10585	10893	497483832	XRE family transcriptional regulator [Nitrobacter sp. Nb-311A]_x0001_
Culture01_3378_12	Culture01_3378	11272	12663	738017569	hypothetical protein, partial [Bradyrhizobium sp. th.b2]
Culture01_3379_1	Culture01_3379	3	3137	488803363	CzcA family heavy metal efflux pump [Afipia felis]_x0001_
Culture01_3379_2	Culture01_3379	3130	4116	654677619	hemolysin D [Bradyrhizobium japonicum]
Culture01_3379_3	Culture01_3379	4113	5384	496697996	divalent cation transporter [Afipia sp. 1NLS2]_x0001_
Culture01_3379_6	Culture01_3379	6725	7840	85697070	uroporphyrinogen decarboxylase [Nitrobacter sp. Nb-311A]
Culture01_3379_7	Culture01_3379	7913	8206	497484950	SirA-like protein [Nitrobacter sp. Nb-311A]_x0001_
Culture01_3379_8	Culture01_3379	8345	9001	497484949	molybdopterin-guanine dinucleotide biosynthesis protein A [Nitrobacter sp. Nb-311A]_x0001_
Culture01_3379_9	Culture01_3379	9030	9569	497484948	methionine sulfoxide reductase A [Nitrobacter sp. Nb-311A]_x0001_
Culture01_3379_10	Culture01_3379	9961	10191	497484947	hypothetical protein [Nitrobacter sp. Nb-311A]_x0001_
Culture01_3379_11	Culture01_3379	10674	11429	497484946	hypothetical protein [Nitrobacter sp. Nb-311A]_x0001_
Culture01_3379_12	Culture01_3379	11817	12776	750393358	nitrate reductase [Nitrobacter sp. Nb-311A]
Culture01_3435_1	Culture01_3435	2	2470	182634461	filamentous haemagglutinin family outer membrane protein [Beijerinckia indica subsp. indica ATCC 9039]
Culture01_3435_2	Culture01_3435	2809	3795	91799252	hypothetical protein Nham_0744 [Nitrobacter hamburgensis X14]
Culture01_3435_3	Culture01_3435	4327	5307	91799252	hypothetical protein Nham_0744 [Nitrobacter hamburgensis X14]
Culture01_3435_4	Culture01_3435	5794	6057	497483548	Transcriptional regulatory protein, LysR [Nitrobacter sp. Nb-311A]_x0001_
Culture01_3448_1	Culture01_3448	2	520	654711362	hypothetical protein [Bradyrhizobium elkanii]
Culture01_3448_2	Culture01_3448	625	1842	505280799	Flavohemoprotein (Hemoglobin-like protein) (Flavohemoglobin) (Nitric oxide dioxygenase) [Micavibrio aeruginosavorus]_x0001_
Culture01_3448_3	Culture01_3448	1915	2337	505280798	Nitrite-sensitive transcriptional repressor NsrR [Micavibrio aeruginosavorus]_x0001_
Culture01_3448_4	Culture01_3448	3010	3942	85695501	cation efflux system protein [Nitrobacter sp. Nb-311A]
Culture01_3483_1	Culture01_3483	67	657	655456559	conjugal transfer protein TrbE [Thermomonas fusca]
Culture01_3483_2	Culture01_3483	667	939	759381811	conjugal transfer protein TrbD [Pseudomonas aeruginosa]
Culture01_3483_3	Culture01_3483	936	1319	553754661	TrbC-like protein [Pseudomonas aeruginosa]_x0001_
Culture01_3483_4	Culture01_3483	1316	2380	752569285	conjugal transfer protein TrbB [Cupriavidus metallidurans]
Culture01_3483_5	Culture01_3483	2377	2841	764131041	CopG family transcriptional regulator [Pseudomonas stutzeri]_x0001_
Culture01_3483_6	Culture01_3483	2838	4853	27817722	putative conjugal transfer protein [Cupriavidus oxalaticus]
Culture01_3483_7	Culture01_3483	5061	5339	727711430	lipoprotein [Stenotrophomonas maltophilia]
Culture01_3483_8	Culture01_3483	5336	6148	553789834	transcriptional regulator [Pseudomonas aeruginosa]_x0001_
Culture01_3483_9	Culture01_3483	6297	7841	221164732	transposase IstA [Burkholderia multivorans CGD1]
Culture01_3483_10	Culture01_3483	7834	8619	640186749	MULTISPECIES: ATPase AAA [Acidovorax]
Culture01_3483_11	Culture01_3483	9217	10188	517252068	ornithine cyclodeaminase [Burkholderia sp. JPY347]
Culture01_3483_12	Culture01_3483	10280	11017	518486703	ABC transporter [Variovorax paradoxus]
Culture01_3483_13	Culture01_3483	11040	11708	503666181	glutamate/aspartate transporter permease GltK [Ramlibacter tataouinensis]_x0001_
Culture01_3483_14	Culture01_3483	11710	12429	503666180	glutamate ABC transporter permease [Ramlibacter tataouinensis]_x0001_
Culture01_3483_15	Culture01_3483	12877	14040	662141253	alanine racemase [Sphingomonas sp. DC-6]
Culture01_3483_16	Culture01_3483	14051	14998	657268172	serine dehydratase [Paracoccus sp. TRP]
Culture01_3483_17	Culture01_3483	15526	15930	499898079	endoribonuclease [Chelativorans sp. BNC1]_x0001_
Culture01_3483_19	Culture01_3483	16568	17470	760014700	ABC transporter substrate-binding protein [Tepidimonas taiwanensis]
Culture01_3483_21	Culture01_3483	18692	19045	538487637	putative endoribonuclease L-PSP [Variovorax paradoxus]_x0001_
Culture01_3483_22	Culture01_3483	19556	20848	653276273	amino acid dehydrogenase [Curvibacter gracilis]
Culture01_3483_23	Culture01_3483	21386	21826	500129129	integrase [Acidovorax sp. JS42]_x0001_
Culture01_3483_24	Culture01_3483	22360	23364	736322403	transporter [Herbaspirillum massiliense]
Culture01_3483_25	Culture01_3483	23374	24108	568600612	MULTISPECIES: acetyltransferase [Dickeya]
Culture01_3483_26	Culture01_3483	24183	24566	545272166	MULTISPECIES: hypothetical protein [Enterobacteriaceae]_x0001_
Culture01_3483_27	Culture01_3483	24563	25126	545272165	MULTISPECIES: hypothetical protein [Enterobacteriaceae]_x0001_
Culture01_3483_28	Culture01_3483	25362	25682	545272164	MULTISPECIES: hypothetical protein [Proteobacteria]_x0001_
Culture01_3483_29	Culture01_3483	25682	25897	545272163	MULTISPECIES: hypothetical protein [Proteobacteria]_x0001_
Culture01_3483_30	Culture01_3483	26379	30548	690583773	TraC conjugative transfer protein, DNA primase [uncultured bacterium pAKD4]_x0001_
Culture01_3483_31	Culture01_3483	30552	30929	499485084	MULTISPECIES: TraD [Burkholderiales]_x0001_
Culture01_3483_32	Culture01_3483	30934	33126	690583779	TraE conjugative transfer protein, DNA topoisomerase [uncultured bacterium pAKD4]_x0001_
Culture01_3483_33	Culture01_3483	33135	33671	499485086	MULTISPECIES: TraF [Burkholderiales]_x0001_
Culture01_3483_34	Culture01_3483	33668	35581	504876430	TraG Conjugative transfer coupling protein [Burkholderia cepacia]_x0001_
Culture01_3483_35	Culture01_3483	35578	37776	690583799	TraI conjugative transfer protein, DNA relaxase [uncultured bacterium pAKD4]_x0001_
Culture01_3483_36	Culture01_3483	37811	38200	690583802	TraJ conjugative transfer protein, relaxosome protein [uncultured bacterium pAKD4]_x0001_
Culture01_3483_37	Culture01_3483	38592	38993	690583803	TraK conjugative transfer protein, OriT binding protein [uncultured bacterium pAKD4]_x0001_
Culture01_3483_38	Culture01_3483	38993	39718	499485093	MULTISPECIES: TraL [Burkholderiales]_x0001_
Culture01_3483_39	Culture01_3483	39718	40155	499485094	TraM [Achromobacter denitrificans]_x0001_
Culture01_3483_40	Culture01_3483	40225	40875	690583805	KfrC stable inheritance protein [uncultured bacterium pAKD4]_x0001_
Culture01_3483_41	Culture01_3483	40906	41250	690583806	KfrB stable inheritance protein [uncultured bacterium pAKD4]_x0001_
Culture01_3483_42	Culture01_3483	41274	41876	499485036	hypothetical protein [Achromobacter denitrificans]_x0001_
Culture01_3483_44	Culture01_3483	42126	43142	499485038	MULTISPECIES: KfrA [Burkholderiales]_x0001_
Culture01_3483_45	Culture01_3483	43338	44411	690583809	KorB transcriptional repressor protein/plasmid partitioning protein [uncultured bacterium pAKD4]_x0001_
Culture01_3483_46	Culture01_3483	44408	45181	690583810	IncC plasmid partitioning protein [uncultured bacterium pAKD4]_x0001_
Culture01_3483_47	Culture01_3483	45178	45504	690583811	KorA transcriptional repressor protein [uncultured bacterium pAKD4]_x0001_
Culture01_3483_48	Culture01_3483	45649	45906	690583812	KleF stable inheritance protein [uncultured bacterium pAKD4]_x0001_
Culture01_3483_49	Culture01_3483	45908	46231	504876437	KleE Stable inheritance protein [Burkholderia cepacia]_x0001_
Culture01_3483_50	Culture01_3483	46348	46605	499485045	MULTISPECIES: KleA [Burkholderiales]_x0001_
Culture01_3483_51	Culture01_3483	46796	47053	499485046	MULTISPECIES: KorC [Burkholderiales]_x0001_
Culture01_3483_52	Culture01_3483	47068	48474	499485047	MULTISPECIES: KlcB [Burkholderiales]_x0001_
Culture01_3483_53	Culture01_3483	48522	48956	499485048	MULTISPECIES: KlcA [Burkholderiales]_x0001_
Culture01_3483_54	Culture01_3483	49054	49338	690583814	hypothetical protein [uncultured bacterium pAKD4]_x0001_
Culture01_3483_56	Culture01_3483	50584	51453	690583677	TrfA2 replication initiation protein [uncultured bacterium pAKD4]_x0001_
Culture01_3483_57	Culture01_3483	51774	52151	690583684	TrbA mating pair formation protein, transcription regulator [uncultured bacterium pAKD4]_x0001_
Culture01_3483_58	Culture01_3483	52406	53368	499485078	MULTISPECIES: TrbB [Burkholderiales]_x0001_
Culture01_3483_59	Culture01_3483	53380	53808	499485079	MULTISPECIES: TrbC [Burkholderiales]_x0001_
Culture01_3483_60	Culture01_3483	53811	54122	499485080	MULTISPECIES: TrbD [Burkholderiales]_x0001_
Culture01_3483_61	Culture01_3483	54119	56656	504876418	TrbE Mating pair formation protein [Burkholderia cepacia]_x0001_
Culture01_3483_62	Culture01_3483	56653	57429	504876419	TrbF Mating pair formation protein [Burkholderia cepacia]_x0001_
Culture01_3483_63	Culture01_3483	57442	58347	690583691	TrbG mating pair formation protein [uncultured bacterium pAKD4]_x0001_
Culture01_3483_64	Culture01_3483	58350	58817	504876421	TrbH Mating pair formation protein [Burkholderia cepacia]_x0001_
Culture01_3483_65	Culture01_3483	58823	60217	690583697	TrbI mating pair formation protein [uncultured bacterium pAKD4]_x0001_
Culture01_3483_66	Culture01_3483	60236	61009	690583709	TrbJ entry exclusion during conjugation protein [uncultured bacterium pAKD4]_x0001_
Culture01_3483_67	Culture01_3483	61020	61259	690583703	TrbK entry exclusion during conjugation protein [uncultured bacterium pAKD4]_x0001_
Culture01_3483_68	Culture01_3483	61270	63015	690583716	TrbL mating pair formation protein [uncultured bacterium pAKD4]_x0001_
Culture01_3483_69	Culture01_3483	63035	63628	504876425	TrbM Mating pair formation protein [Burkholderia cepacia]_x0001_
Culture01_3483_70	Culture01_3483	63642	64247	504876426	TrbN Mating pair formation protein [Burkholderia cepacia]_x0001_
Culture01_3483_71	Culture01_3483	64273	64536	504876427	TrbO Mating pair formation protein [Burkholderia cepacia]_x0001_
Culture01_3483_72	Culture01_3483	64533	65237	504876428	TrbP Mating pair formation protein [Burkholderia cepacia]_x0001_
Culture01_3483_73	Culture01_3483	65251	65676	499192602	hypothetical protein [Enterobacter aerogenes]_x0001_
Culture01_3483_74	Culture01_3483	65678	66163	504876408	Hypothetical protein [Burkholderia cepacia]_x0001_
Culture01_3483_75	Culture01_3483	66148	66567	690583722	hypothetical protein [uncultured bacterium pAKD4]_x0001_
Culture01_3483_76	Culture01_3483	66524	66826	690583727	ParA resolvase [uncultured bacterium pAKD4]_x0001_
Culture01_3486_1	Culture01_3486	3	905	499635394	hypothetical protein [Nitrobacter winogradskyi]_x0001_
Culture01_3486_2	Culture01_3486	1387	2784	499635395	lytic transglycosylase [Nitrobacter winogradskyi]_x0001_
Culture01_3486_3	Culture01_3486	3163	4038	497483068	UTP--glucose-1-phosphate uridylyltransferase [Nitrobacter sp. Nb-311A]_x0001_
Culture01_3486_4	Culture01_3486	4043	4312	497483069	hypothetical protein [Nitrobacter sp. Nb-311A]_x0001_
Culture01_3486_5	Culture01_3486	4557	5276	497483070	methionine sulfoxide reductase A [Nitrobacter sp. Nb-311A]_x0001_
Culture01_3486_6	Culture01_3486	5294	5707	497483071	methionine sulfoxide reductase B [Nitrobacter sp. Nb-311A]_x0001_
Culture01_3486_7	Culture01_3486	6011	6298	497483072	hypothetical protein [Nitrobacter sp. Nb-311A]_x0001_
Culture01_3486_8	Culture01_3486	6433	6984	74422013	conserved hypothetical protein [Nitrobacter winogradskyi Nb-255]
Culture01_3486_10	Culture01_3486	7540	9099	497483076	hypothetical protein [Nitrobacter sp. Nb-311A]_x0001_
Culture01_3486_11	Culture01_3486	9151	10443	497483077	adenylosuccinate synthetase [Nitrobacter sp. Nb-311A]_x0001_
Culture01_3486_12	Culture01_3486	10846	12399	497483078	peptidase S10 [Nitrobacter sp. Nb-311A]_x0001_
Culture01_3486_13	Culture01_3486	12548	14137	85697920	D-3-phosphoglycerate dehydrogenase [Nitrobacter sp. Nb-311A]
Culture01_3486_14	Culture01_3486	14394	15566	497483080	phosphoserine aminotransferase [Nitrobacter sp. Nb-311A]_x0001_
Culture01_3486_15	Culture01_3486	15708	16580	85697922	hypothetical protein NB311A_05248 [Nitrobacter sp. Nb-311A]
Culture01_3486_16	Culture01_3486	16748	17599	85697924	hypothetical protein NB311A_05258 [Nitrobacter sp. Nb-311A]
Culture01_3486_17	Culture01_3486	17800	19047	497483084	Fosmidomycin resistance protein [Nitrobacter sp. Nb-311A]_x0001_
Culture01_3486_18	Culture01_3486	19180	20526	497483085	phosphoglucosamine mutase [Nitrobacter sp. Nb-311A]_x0001_
Culture01_3486_20	Culture01_3486	21089	22969	497483088	iron transporter FeoB [Nitrobacter sp. Nb-311A]_x0001_
Culture01_3486_21	Culture01_3486	22966	23280	91799582	FeoA [Nitrobacter hamburgensis X14]
Culture01_3486_22	Culture01_3486	23378	24232	499828917	shikimate 5-dehydrogenase [Nitrobacter hamburgensis]_x0001_
Culture01_3486_23	Culture01_3486	24349	26424	750391782	elongation factor G [Nitrobacter sp. Nb-311A]
Culture01_3486_24	Culture01_3486	26700	27182	499828913	hypothetical protein [Nitrobacter hamburgensis]_x0001_
Culture01_3486_25	Culture01_3486	27366	27917	497483122	hypothetical protein [Nitrobacter sp. Nb-311A]_x0001_
Culture01_3486_26	Culture01_3486	28135	29337	499635418	aspartate aminotransferase [Nitrobacter winogradskyi]_x0001_
Culture01_3486_27	Culture01_3486	29528	30754	654899264	membrane protein [Bradyrhizobium elkanii]
Culture01_3486_28	Culture01_3486	30741	31730	750123394	glycosyl transferase family protein [Afipia birgiae]
Culture01_3486_29	Culture01_3486	31900	32550	499635419	glutathione S-transferase [Nitrobacter winogradskyi]_x0001_
Culture01_3486_31	Culture01_3486	32967	34115	750392069	hypothetical protein [Nitrobacter sp. Nb-311A]
Culture01_3486_32	Culture01_3486	34178	34750	85697957	hypothetical protein NB311A_05423 [Nitrobacter sp. Nb-311A]
Culture01_3486_33	Culture01_3486	34954	35160	499828907	hypothetical protein [Nitrobacter hamburgensis]_x0001_
Culture01_3486_34	Culture01_3486	35185	36492	499828906	isocitrate lyase [Nitrobacter hamburgensis]_x0001_
Culture01_3486_35	Culture01_3486	36673	38124	497483113	DNA-binding protein [Nitrobacter sp. Nb-311A]_x0001_
Culture01_3486_37	Culture01_3486	39210	39713	497483111	hypothetical protein [Nitrobacter sp. Nb-311A]_x0001_
Culture01_3486_38	Culture01_3486	39729	41267	497483110	glycerol-3-phosphate dehydrogenase [Nitrobacter sp. Nb-311A]_x0001_
Culture01_3486_40	Culture01_3486	41967	42413	85697949	thioesterase superfamily protein [Nitrobacter sp. Nb-311A]
Culture01_3486_41	Culture01_3486	42445	44535	497483106	fatty-acid oxidation protein subunit alpha [Nitrobacter sp. Nb-311A]_x0001_
Culture01_3486_42	Culture01_3486	44543	45826	499635432	acetyl-CoA acetyltransferase [Nitrobacter winogradskyi]_x0001_
Culture01_3486_43	Culture01_3486	45826	48090	74422046	Acyl-CoA dehydrogenase [Nitrobacter winogradskyi Nb-255]
Culture01_3486_45	Culture01_3486	48493	50589	85697944	Methyl-accepting chemotaxis protein [Nitrobacter sp. Nb-311A]
Culture01_3486_47	Culture01_3486	51247	52014	499635436	hypothetical protein [Nitrobacter winogradskyi]_x0001_
Culture01_3486_49	Culture01_3486	52358	53674	497483098	membrane protein [Nitrobacter sp. Nb-311A]_x0001_
Culture01_3486_50	Culture01_3486	53716	54708	497483097	nitronate monooxygenase [Nitrobacter sp. Nb-311A]_x0001_
Culture01_3486_51	Culture01_3486	55063	55668	752711678	hypothetical protein [Nitrobacter hamburgensis]
Culture01_3486_52	Culture01_3486	55941	56174	497483095	hypothetical protein [Nitrobacter sp. Nb-311A]_x0001_
Culture01_3486_53	Culture01_3486	56611	59853	497483094	hypothetical protein [Nitrobacter sp. Nb-311A]_x0001_
Culture01_3486_54	Culture01_3486	60111	60929	497483092	formate/nitrite transporter [Nitrobacter sp. Nb-311A]_x0001_
Culture01_3486_55	Culture01_3486	61640	62065	499635445	PadR family transcripitonal regulator [Nitrobacter winogradskyi]_x0001_
Culture01_3486_57	Culture01_3486	63696	63953	497482152	hypothetical protein [Nitrobacter sp. Nb-311A]_x0001_
Culture01_3486_58	Culture01_3486	64082	64756	499831032	serine/threonine protein phosphatase [Nitrobacter hamburgensis]_x0001_
Culture01_3486_59	Culture01_3486	64836	66011	497482154	hypothetical protein [Nitrobacter sp. Nb-311A]_x0001_
Culture01_3702_1	Culture01_3702	1	594	365421360	exported hypothetical protein [Bradyrhizobium sp. STM 3843]
Culture01_3702_4	Culture01_3702	2447	3505	74420400	TonB-dependent siderophore receptor [Nitrobacter winogradskyi Nb-255]
Culture01_372_2	Culture01_372	198	953	499633689	flagellar biosynthesis protein FliP [Nitrobacter winogradskyi]_x0001_
Culture01_372_3	Culture01_372	950	1834	497485148	flagellar biosynthesis protein FliO [Nitrobacter sp. Nb-311A]_x0001_
Culture01_372_4	Culture01_372	2208	2615	750393436	flagellar basal body rod protein FlgB [Nitrobacter sp. Nb-311A]
Culture01_372_5	Culture01_372	2645	3070	499829172	flagellar basal body rod protein FlgC [Nitrobacter hamburgensis]_x0001_
Culture01_372_6	Culture01_372	3085	3396	750393439	flagellar hook-basal body protein FliE [Nitrobacter sp. Nb-311A]
Culture01_372_7	Culture01_372	3459	3722	750393537	flagellar biosynthesis protein FliQ [Nitrobacter sp. Nb-311A]
Culture01_372_8	Culture01_372	3737	4507	497485153	flagellar biosynthesis protein FliR [Nitrobacter sp. Nb-311A]_x0001_
Culture01_372_9	Culture01_372	4518	5597	499633696	flagellar biosynthesis protein FlhB [Nitrobacter winogradskyi]_x0001_
Culture01_372_10	Culture01_372	5747	8299	74420201	cell cycle control histidine kinase CckA [Nitrobacter winogradskyi Nb-255]
Culture01_372_11	Culture01_372	8366	9331	497485156	hypothetical protein [Nitrobacter sp. Nb-311A]_x0001_
Culture01_372_13	Culture01_372	9692	10468	750393568	signal peptide protein [Nitrobacter sp. Nb-311A]
Culture01_372_14	Culture01_372	10549	11127	499633706	membrane protein [Nitrobacter winogradskyi]_x0001_
Culture01_372_15	Culture01_372	11124	11699	499633707	membrane protein [Nitrobacter winogradskyi]_x0001_
Culture01_372_16	Culture01_372	11856	14135	499633708	penicillin-binding protein 1A [Nitrobacter winogradskyi]_x0001_
Culture01_372_17	Culture01_372	14533	14979	85696620	hypothetical protein NB311A_12222 [Nitrobacter sp. Nb-311A]
Culture01_372_18	Culture01_372	15134	16693	497485225	MFS transporter [Nitrobacter sp. Nb-311A]_x0001_
Culture01_372_21	Culture01_372	17594	18166	74420222	hypothetical protein Nwi_1159 [Nitrobacter winogradskyi Nb-255]
Culture01_372_22	Culture01_372	18247	19515	499633717	ATP-binding protein [Nitrobacter winogradskyi]_x0001_
Culture01_372_23	Culture01_372	19577	20752	499633718	portal protein [Nitrobacter winogradskyi]_x0001_
Culture01_372_26	Culture01_372	21299	21949	499829192	peptidase U35 [Nitrobacter hamburgensis]_x0001_
Culture01_372_27	Culture01_372	21990	22277	497485235	hypothetical protein [Nitrobacter sp. Nb-311A]_x0001_
Culture01_372_28	Culture01_372	22441	23694	497485236	capsid protein [Nitrobacter sp. Nb-311A]_x0001_
Culture01_372_29	Culture01_372	23890	24708	85696634	hypothetical protein NB311A_12292 [Nitrobacter sp. Nb-311A]
Culture01_372_30	Culture01_372	24705	25082	85696635	hypothetical protein NB311A_12297 [Nitrobacter sp. Nb-311A]
Culture01_372_33	Culture01_372	25966	26337	499633726	hypothetical protein [Nitrobacter winogradskyi]_x0001_
Culture01_372_34	Culture01_372	26353	27111	85696636	peptidase S1 and S6, chymotrypsin/Hap [Nitrobacter sp. Nb-311A]
Culture01_372_35	Culture01_372	27177	27740	497485241	hypothetical protein [Nitrobacter sp. Nb-311A]_x0001_
Culture01_372_36	Culture01_372	27773	28183	499633730	hypothetical protein [Nitrobacter winogradskyi]_x0001_
Culture01_372_37	Culture01_372	28197	28604	497483144	tail protein [Nitrobacter sp. Nb-311A]_x0001_
Culture01_372_38	Culture01_372	28620	28940	497483145	hypothetical protein [Nitrobacter sp. Nb-311A]_x0001_
Culture01_372_40	Culture01_372	29142	29717	499829201	hypothetical protein [Nitrobacter hamburgensis]_x0001_
Culture01_372_41	Culture01_372	29721	30362	499633735	glycoside hydrolase family 24 [Nitrobacter winogradskyi]_x0001_
Culture01_372_42	Culture01_372	30359	31252	497483150	hypothetical protein [Nitrobacter sp. Nb-311A]_x0001_
Culture01_372_43	Culture01_372	31264	31710	499633737	peptidase [Nitrobacter winogradskyi]_x0001_
Culture01_372_44	Culture01_372	31710	35564	497483152	hypothetical protein [Nitrobacter sp. Nb-311A]_x0001_
Culture01_372_45	Culture01_372	35570	37069	74420245	hypothetical protein Nwi_1182 [Nitrobacter winogradskyi Nb-255]
Culture01_372_47	Culture01_372	37695	38360	497483155	possible glycohydrolase [Nitrobacter sp. Nb-311A]_x0001_
Culture01_372_48	Culture01_372	38375	38671	497483156	hypothetical protein [Nitrobacter sp. Nb-311A]_x0001_
Culture01_372_49	Culture01_372	38728	38967	497483157	hypothetical protein [Nitrobacter sp. Nb-311A]_x0001_
Culture01_372_50	Culture01_372	38988	39380	497483158	hypothetical protein [Nitrobacter sp. Nb-311A]_x0001_
Culture01_372_51	Culture01_372	39384	39635	499633743	hypothetical protein [Nitrobacter winogradskyi]_x0001_
Culture01_372_52	Culture01_372	39770	40441	497483160	transcriptional regulator [Nitrobacter sp. Nb-311A]_x0001_
Culture01_372_53	Culture01_372	40431	41831	497483161	ATPase [Nitrobacter sp. Nb-311A]_x0001_
Culture01_372_54	Culture01_372	42093	43484	497483163	hypothetical protein [Nitrobacter sp. Nb-311A]_x0001_
Culture01_372_55	Culture01_372	43647	44750	497483164	cytochrome C biogenesis protein [Nitrobacter sp. Nb-311A]_x0001_
Culture01_372_56	Culture01_372	44782	45270	499633749	cytochrome C biogenesis protein CcdA [Nitrobacter winogradskyi]_x0001_
Culture01_372_57	Culture01_372	45267	47249	497483166	heme lyase subunit CcmF [Nitrobacter sp. Nb-311A]_x0001_
Culture01_372_58	Culture01_372	47257	47820	74420257	Cytochrome C biogenesis protein [Nitrobacter winogradskyi Nb-255]
Culture01_372_59	Culture01_372	48221	49771	497483168	serine peptidase [Nitrobacter sp. Nb-311A]_x0001_
Culture01_372_60	Culture01_372	50008	50829	499633753	XRE family transcriptional regulator [Nitrobacter winogradskyi]_x0001_
Culture01_372_61	Culture01_372	50883	52343	499633755	ATPase [Nitrobacter winogradskyi]_x0001_
Culture01_372_62	Culture01_372	52340	55303	750392077	bifunctional glutamine-synthetase adenylyltransferase/deadenyltransferase [Nitrobacter sp. Nb-311A]
Culture01_372_63	Culture01_372	55311	57617	85697798	Signal transduction histidine kinase [Nitrobacter sp. Nb-311A]
Culture01_372_64	Culture01_372	57821	59203	499633758	cation diffusion facilitator family transporter [Nitrobacter winogradskyi]_x0001_
Culture01_372_65	Culture01_372	59338	59736	497483176	hypothetical protein [Nitrobacter sp. Nb-311A]_x0001_
Culture01_372_66	Culture01_372	59974	60273	85697801	histone-like DNA-binding protein [Nitrobacter sp. Nb-311A]
Culture01_372_67	Culture01_372	60392	62869	497483178	glycogen phosphorylase [Nitrobacter sp. Nb-311A]_x0001_
Culture01_372_68	Culture01_372	63062	64825	497483179	1,4-alpha-glucan branching protein [Nitrobacter sp. Nb-311A]_x0001_
Culture01_372_69	Culture01_372	64822	66900	497483180	glycogen debranching protein [Nitrobacter sp. Nb-311A]_x0001_
Culture01_372_70	Culture01_372	66897	69047	497483181	glycogen branching protein [Nitrobacter sp. Nb-311A]_x0001_
Culture01_372_71	Culture01_372	69044	72328	497483182	alpha-amylase [Nitrobacter sp. Nb-311A]_x0001_
Culture01_372_72	Culture01_372	72337	74310	497483183	alpha-1,4-glucan:maltose-1-phosphate maltosyltransferase [Nitrobacter sp. Nb-311A]_x0001_
Culture01_372_73	Culture01_372	74462	76405	497483184	4-alpha-glucanotransferase [Nitrobacter sp. Nb-311A]_x0001_
Culture01_372_74	Culture01_372	76531	77043	499633768	peptidase [Nitrobacter winogradskyi]_x0001_
Culture01_372_75	Culture01_372	77090	78700	499633769	ATPase [Nitrobacter winogradskyi]_x0001_
Culture01_372_76	Culture01_372	78894	79967	499633770	oxidoreductase [Nitrobacter winogradskyi]_x0001_
Culture01_372_77	Culture01_372	79993	80382	750392079	glyoxalase [Nitrobacter sp. Nb-311A]
Culture01_372_78	Culture01_372	80531	81670	750392081	sodium:proton antiporter [Nitrobacter sp. Nb-311A]
Culture01_372_79	Culture01_372	81859	82947	497483190	ABC transporter substrate-binding protein [Nitrobacter sp. Nb-311A]_x0001_
Culture01_372_80	Culture01_372	82996	84606	499633774	C4-dicarboxylate ABC transporter [Nitrobacter winogradskyi]_x0001_
Culture01_372_81	Culture01_372	84603	85142	499829254	C4-dicarboxylate ABC transporter [Nitrobacter hamburgensis]_x0001_
Culture01_372_82	Culture01_372	85602	86633	499633776	molybdenum cofactor biosynthesis protein MoeA [Nitrobacter winogradskyi]_x0001_
Culture01_372_83	Culture01_372	86900	87577	85697818	phosphoglycolate phosphatase [Nitrobacter sp. Nb-311A]
Culture01_372_84	Culture01_372	87776	88471	499633778	ribose 5-phosphate isomerase A [Nitrobacter winogradskyi]_x0001_
Culture01_372_85	Culture01_372	88497	89006	750392085	hypothetical protein [Nitrobacter sp. Nb-311A]
Culture01_372_86	Culture01_372	89026	90411	499829260	glutathione reductase [Nitrobacter hamburgensis]_x0001_
Culture01_372_87	Culture01_372	90651	92039	497483198	phospho-2-dehydro-3-deoxyheptonate aldolase [Nitrobacter sp. Nb-311A]_x0001_
Culture01_372_88	Culture01_372	92041	92394	499829262	diacylglycerol kinase [Nitrobacter hamburgensis]_x0001_
Culture01_372_89	Culture01_372	92500	94251	499829263	NAD synthetase [Nitrobacter hamburgensis]_x0001_
Culture01_372_90	Culture01_372	94333	95427	497483200	hypothetical protein [Nitrobacter sp. Nb-311A]_x0001_
Culture01_372_92	Culture01_372	96280	97740	499829266	cysteinyl-tRNA synthetase [Nitrobacter hamburgensis]_x0001_
Culture01_372_94	Culture01_372	97855	98355	497483204	GCN5 family acetyltransferase [Nitrobacter sp. Nb-311A]_x0001_
Culture01_372_95	Culture01_372	98352	99950	497483205	2-isopropylmalate synthase [Nitrobacter sp. Nb-311A]_x0001_
Culture01_372_96	Culture01_372	99971	100573	85697830	hypothetical protein NB311A_12814 [Nitrobacter sp. Nb-311A]
Culture01_372_97	Culture01_372	100782	102740	499633790	metal ABC transporter permease [Nitrobacter winogradskyi]_x0001_
Culture01_372_98	Culture01_372	102859	103605	118573174	PSD_NITWN RecName: Full=Phosphatidylserine decarboxylase proenzyme; Contains: RecName: Full=Phosphatidylserine decarboxylase alpha chain; Contains: RecName: Full=Phosphatidylserine decarboxylase beta chain [Nitrobacter winogradskyi Nb-255]_x0001_
Culture01_372_99	Culture01_372	103638	104198	750392092	CDP-diacylglycerol--serine O-phosphatidyltransferase [Nitrobacter sp. Nb-311A]
Culture01_3733_1	Culture01_3733	1	462	497484259	peptidase C39 [Nitrobacter sp. Nb-311A]_x0001_
Culture01_3733_2	Culture01_3733	818	1447	74419602	hypothetical protein Nwi_0534 [Nitrobacter winogradskyi Nb-255]
Culture01_3733_3	Culture01_3733	1635	2837	497484262	calcium-binding protein [Nitrobacter sp. Nb-311A]_x0001_
Culture01_3733_4	Culture01_3733	3227	3931	74419600	plasmid segregation oscillating ATPase ParF [Nitrobacter winogradskyi Nb-255]
Culture01_3733_5	Culture01_3733	3979	4374	497484264	transposase [Nitrobacter sp. Nb-311A]_x0001_
Culture01_3733_6	Culture01_3733	5737	6858	499633123	flagellar biosynthesis protein FlhA [Nitrobacter winogradskyi]_x0001_
Culture01_3795_1	Culture01_3795	2	592	496321925	chemotaxis protein [Bradyrhizobium sp. ORS 375]_x0001_
Culture01_3795_2	Culture01_3795	659	1333	497485504	leucyl/phenylalanyl-tRNA--protein transferase [Nitrobacter sp. Nb-311A]_x0001_
Culture01_3795_3	Culture01_3795	1581	2669	497485503	chemotaxis protein CheY [Nitrobacter sp. Nb-311A]_x0001_
Culture01_3795_4	Culture01_3795	2666	3106	497485502	chemotaxis protein CheY [Nitrobacter sp. Nb-311A]_x0001_
Culture01_3795_5	Culture01_3795	3103	4635	497485501	histidine kinase [Nitrobacter sp. Nb-311A]_x0001_
Culture01_3795_6	Culture01_3795	4769	6124	497485500	acetyl-CoA carboxylase biotin carboxylase subunit [Nitrobacter sp. Nb-311A]_x0001_
Culture01_3795_7	Culture01_3795	6150	6635	499634275	acetyl-CoA carboxylase [Nitrobacter winogradskyi]_x0001_
Culture01_3795_8	Culture01_3795	6680	7141	499634274	3-dehydroquinate dehydratase [Nitrobacter winogradskyi]_x0001_
Culture01_3795_9	Culture01_3795	7401	8144	737688256	hypothetical protein, partial [Bradyrhizobium sp. STM 3809]
Culture01_3795_10	Culture01_3795	8318	9082	499634273	DSBA oxidoreductase [Nitrobacter winogradskyi]_x0001_
Culture01_3795_11	Culture01_3795	9121	10554	497485496	peptidase M48 [Nitrobacter sp. Nb-311A]_x0001_
Culture01_3795_12	Culture01_3795	10658	11845	497485495	1-aminocyclopropane-1-carboxylate deaminase [Nitrobacter sp. Nb-311A]_x0001_
Culture01_3795_13	Culture01_3795	12186	14306	499634270	pyrophosphatase [Nitrobacter winogradskyi]_x0001_
Culture01_3795_14	Culture01_3795	15080	15895	499829916	2-methylisocitrate lyase [Nitrobacter hamburgensis]_x0001_
Culture01_3795_15	Culture01_3795	16171	17481	85696991	indolepyruvate ferredoxin oxidoreductase [Nitrobacter sp. Nb-311A]
Culture01_3807_1	Culture01_3807	1	1488	497484907	TonB-denpendent receptor [Nitrobacter sp. Nb-311A]_x0001_
Culture01_3807_2	Culture01_3807	1837	2904	91801992	outer membrane transport energization protein ExbB [Nitrobacter hamburgensis X14]
Culture01_3807_3	Culture01_3807	2917	3369	750393164	biopolymer transporter [Nitrobacter sp. Nb-311A]
Culture01_3807_4	Culture01_3807	3366	4121	497484910	translocase [Nitrobacter sp. Nb-311A]_x0001_
Culture01_3807_5	Culture01_3807	4118	6538	497484911	preprotein translocase subunit SecA [Nitrobacter sp. Nb-311A]_x0001_
Culture01_3807_6	Culture01_3807	6986	8317	501291778	MFS transporter [Methylobacterium sp. 4-46]_x0001_
Culture01_3807_7	Culture01_3807	8644	9639	499828689	catalase-like [Nitrobacter hamburgensis]_x0001_
Culture01_3807_8	Culture01_3807	9832	10317	654698421	hypothetical protein [Bradyrhizobium japonicum]_x0001_
Culture01_3807_9	Culture01_3807	10318	10917	654698422	hypothetical protein [Bradyrhizobium japonicum]_x0001_
Culture01_3807_10	Culture01_3807	11308	11982	639174772	LuxR family transcriptional regulator [Bradyrhizobium sp. Tv2a-2]
Culture01_3807_11	Culture01_3807	12146	13198	739247973	DNA-binding protein, partial [Rhizobium sp. 2MFCol3.1]
Culture01_3807_13	Culture01_3807	13268	14299	738303769	hypothetical protein, partial [Methylocapsa acidiphila]
Culture01_3807_14	Culture01_3807	14402	15622	503713056	MULTISPECIES: peptidase M14 [Hyphomicrobium]_x0001_
Culture01_3807_15	Culture01_3807	16190	16939	737696066	hypothetical protein [Bradyrhizobium sp. Ec3.3]
Culture01_3807_16	Culture01_3807	17199	18215	518026201	hypothetical protein [Afipia birgiae]
Culture01_3807_17	Culture01_3807	18341	18970	639174755	LuxR family transcriptional regulator [Bradyrhizobium sp. Tv2a-2]
Culture01_3807_18	Culture01_3807	19189	20322	653436265	diguanylate cyclase [Bradyrhizobium sp. WSM3983]
Culture01_3807_19	Culture01_3807	20759	23356	738092751	hypothetical protein, partial [Bradyrhizobium sp. Tv2a-2]
Culture01_3807_20	Culture01_3807	23396	24295	657883061	alpha/beta hydrolase [Bradyrhizobium sp. URHD0069]
Culture01_3847_1	Culture01_3847	1	393	85697833	CDP-diacylglycerol--serine O-phosphatidyltransferase [Nitrobacter sp. Nb-311A]
Culture01_3847_2	Culture01_3847	768	1571	499633793	flagellar motor protein PomA [Nitrobacter winogradskyi]_x0001_
Culture01_3847_3	Culture01_3847	1682	2512	497483211	membrane protein [Nitrobacter sp. Nb-311A]_x0001_
Culture01_3847_4	Culture01_3847	2661	4565	497483212	potassium transporter Kup [Nitrobacter sp. Nb-311A]_x0001_
Culture01_3847_5	Culture01_3847	4695	6620	653448728	potassium transport protein Kup [Bradyrhizobium sp. URHA0002]
Culture01_3847_6	Culture01_3847	6727	7062	497483213	rhodanese [Nitrobacter sp. Nb-311A]_x0001_
Culture01_3847_7	Culture01_3847	7069	8232	85697838	hypothetical protein NB311A_12854 [Nitrobacter sp. Nb-311A]
Culture01_3847_8	Culture01_3847	8246	9361	497483215	putrescine/spermidine ABC transporter substrate-binding protein [Nitrobacter sp. Nb-311A]_x0001_
Culture01_3847_9	Culture01_3847	9411	10343	497483216	lauroyl acyltransferase [Nitrobacter sp. Nb-311A]_x0001_
Culture01_3847_10	Culture01_3847	10356	11627	91799950	beta-ketoacyl synthase [Nitrobacter hamburgensis X14]
Culture01_3847_11	Culture01_3847	11665	12870	499829281	3-oxoacyl-ACP synthase [Nitrobacter hamburgensis]_x0001_
Culture01_3847_12	Culture01_3847	12863	13336	497483219	3-hydroxyacyl-ACP dehydratase [Nitrobacter sp. Nb-311A]_x0001_
Culture01_3847_13	Culture01_3847	13347	13628	499829283	acyl carrier protein [Nitrobacter hamburgensis]_x0001_
Culture01_3847_14	Culture01_3847	14379	16040	85697846	hypothetical protein NB311A_12894 [Nitrobacter sp. Nb-311A]
Culture01_3847_16	Culture01_3847	17052	17414	640482559	MULTISPECIES: ArsR family transcriptional regulator [Mesorhizobium]
Culture01_3847_17	Culture01_3847	17460	17885	499635546	arsenate reductase [Nitrobacter winogradskyi]_x0001_
Culture01_3847_18	Culture01_3847	17895	18671	499635547	arsenic transporter [Nitrobacter winogradskyi]_x0001_
Culture01_4005_1	Culture01_4005	2	271	499830608	transporter [Nitrobacter hamburgensis]_x0001_
Culture01_4005_3	Culture01_4005	1305	2957	499830609	heme ABC transporter ATP-binding protein [Nitrobacter hamburgensis]_x0001_
Culture01_4005_6	Culture01_4005	3961	5088	74421542	ErfK/YbiS/YcfS/YnhG [Nitrobacter winogradskyi Nb-255]
Culture01_4005_7	Culture01_4005	5426	6178	91801307	conserved hypothetical protein [Nitrobacter hamburgensis X14]
Culture01_4005_8	Culture01_4005	6185	7039	74421544	Rhodanese-related sulfurtransferase [Nitrobacter winogradskyi Nb-255]
Culture01_4005_9	Culture01_4005	7096	7689	497484549	GCN5 family N-acetyltransferase [Nitrobacter sp. Nb-311A]_x0001_
Culture01_4005_10	Culture01_4005	7822	8178	74421546	hypothetical protein Nwi_2492 [Nitrobacter winogradskyi Nb-255]
Culture01_4005_11	Culture01_4005	8443	9255	499634965	hypothetical protein [Nitrobacter winogradskyi]_x0001_
Culture01_4005_12	Culture01_4005	9676	12753	91801315	Excinuclease ABC subunit B [Nitrobacter hamburgensis X14]
Culture01_4005_13	Culture01_4005	13018	13461	499830621	hypothetical protein [Nitrobacter hamburgensis]_x0001_
Culture01_4005_14	Culture01_4005	13424	14686	499830622	hypothetical protein [Nitrobacter hamburgensis]_x0001_
Culture01_4005_15	Culture01_4005	14913	15248	499830623	hypothetical protein [Nitrobacter hamburgensis]_x0001_
Culture01_4005_16	Culture01_4005	15504	16394	85697212	hypothetical protein NB311A_14395 [Nitrobacter sp. Nb-311A]
Culture01_4005_17	Culture01_4005	16546	16980	85697213	hypothetical protein NB311A_14400 [Nitrobacter sp. Nb-311A]
Culture01_4005_18	Culture01_4005	17067	18020	74421555	ribose-phosphate pyrophosphokinase [Nitrobacter winogradskyi Nb-255]
Culture01_4005_19	Culture01_4005	18338	19108	497484559	polyphenol oxidase [Nitrobacter sp. Nb-311A]_x0001_
Culture01_4005_20	Culture01_4005	19105	20232	497484560	ATP synthase subunit beta [Nitrobacter sp. Nb-311A]_x0001_
Culture01_4005_21	Culture01_4005	20225	21091	85697217	prolipoprotein diacylglyceryl transferase [Nitrobacter sp. Nb-311A]
Culture01_4005_22	Culture01_4005	21294	21551	85697218	hypothetical protein NB311A_14425 [Nitrobacter sp. Nb-311A]
Culture01_4005_24	Culture01_4005	21844	22326	499634977	acyl dehydratase [Nitrobacter winogradskyi]_x0001_
Culture01_4005_25	Culture01_4005	22331	22792	499634978	enoyl-CoA hydratase [Nitrobacter winogradskyi]_x0001_
Culture01_4005_26	Culture01_4005	22949	23245	497484564	hypothetical protein [Nitrobacter sp. Nb-311A]_x0001_
Culture01_4005_27	Culture01_4005	23402	24499	488800793	GTP-binding protein YchF [Afipia clevelandensis]_x0001_
Culture01_4005_28	Culture01_4005	24634	25248	499830764	peptidyl-tRNA hydrolase [Nitrobacter hamburgensis]_x0001_
Culture01_4005_29	Culture01_4005	25365	26096	497484567	50S ribosomal protein L25 [Nitrobacter sp. Nb-311A]_x0001_
Culture01_4005_30	Culture01_4005	26850	27350	497484568	hypothetical protein [Nitrobacter sp. Nb-311A]_x0001_
Culture01_4005_31	Culture01_4005	27523	28359	499830768	pyrroline-5-carboxylate reductase [Nitrobacter hamburgensis]_x0001_
Culture01_4005_32	Culture01_4005	28519	30030	497484570	aldehyde dehydrogenase [Nitrobacter sp. Nb-311A]_x0001_
Culture01_4005_33	Culture01_4005	30107	31324	497484571	ornithine-oxoacid aminotransferase [Nitrobacter sp. Nb-311A]_x0001_
Culture01_4005_34	Culture01_4005	31472	32806	497484572	ATPase [Nitrobacter sp. Nb-311A]_x0001_
Culture01_4005_35	Culture01_4005	32869	33597	497484573	chemotaxis protein CheY [Nitrobacter sp. Nb-311A]_x0001_
Culture01_4005_36	Culture01_4005	33594	34139	91801499	transcriptional regulator, MarR family [Nitrobacter hamburgensis X14]
Culture01_4005_37	Culture01_4005	34397	35509	497484575	branched-chain amino acid aminotransferase [Nitrobacter sp. Nb-311A]_x0001_
Culture01_4005_38	Culture01_4005	35529	36959	497484576	multidrug transporter MatE [Nitrobacter sp. Nb-311A]_x0001_
Culture01_4005_39	Culture01_4005	37056	38096	499634992	N5-glutamine S-adenosyl-L-methionine-dependent methyltransferase [Nitrobacter winogradskyi]_x0001_
Culture01_4005_40	Culture01_4005	38096	38575	499830802	molybdenum cofactor biosynthesis protein MoaE [Nitrobacter hamburgensis]_x0001_
Culture01_4005_41	Culture01_4005	38598	38849	497484579	molybdenum cofactor biosynthesis protein MoaD [Nitrobacter sp. Nb-311A]_x0001_
Culture01_4005_42	Culture01_4005	38846	39463	499634995	CDP-diacylglycerol--glycerol-3-phosphate 3-phosphatidyltransferase [Nitrobacter winogradskyi]_x0001_
Culture01_4005_43	Culture01_4005	39598	41583	85697237	excinuclease ABC subunit C [Nitrobacter sp. Nb-311A]
Culture01_4005_44	Culture01_4005	41930	42550	497484582	membrane protein [Nitrobacter sp. Nb-311A]_x0001_
Culture01_4005_45	Culture01_4005	42699	43553	499634998	lactate dehydrogenase [Nitrobacter winogradskyi]_x0001_
Culture01_4005_46	Culture01_4005	43647	44339	497484584	ribonuclease [Nitrobacter sp. Nb-311A]_x0001_
Culture01_4005_47	Culture01_4005	44541	44996	497484585	signal peptide protein [Nitrobacter sp. Nb-311A]_x0001_
Culture01_4005_48	Culture01_4005	45163	45453	85697242	hypothetical protein NB311A_14545 [Nitrobacter sp. Nb-311A]
Culture01_4005_49	Culture01_4005	45619	46149	497484587	hypothetical protein [Nitrobacter sp. Nb-311A]_x0001_
Culture01_4005_50	Culture01_4005	46255	47871	209874529	histidyl-tRNA synthetase [Oligotropha carboxidovorans OM5]
Culture01_4005_51	Culture01_4005	47985	49649	499635005	hypothetical protein [Nitrobacter winogradskyi]_x0001_
Culture01_4005_52	Culture01_4005	49661	50098	74421590	TadE-like protein [Nitrobacter winogradskyi Nb-255]
Culture01_4005_53	Culture01_4005	50491	51828	497484591	omega amino acid--pyruvate aminotransferase [Nitrobacter sp. Nb-311A]_x0001_
Culture01_4005_54	Culture01_4005	51945	53387	497484592	diguanylate phosphodiesterase [Nitrobacter sp. Nb-311A]_x0001_
Culture01_4005_55	Culture01_4005	53402	54256	499635009	haloacid dehalogenase [Nitrobacter winogradskyi]_x0001_
Culture01_4005_56	Culture01_4005	54325	54720	497484594	chemotaxis protein CheY [Nitrobacter sp. Nb-311A]_x0001_
Culture01_4005_57	Culture01_4005	55047	55958	85695999	riboflavin kinase / FAD synthetase [Nitrobacter sp. Nb-311A]
Culture01_4005_58	Culture01_4005	55976	56512	654899185	maltose acetyltransferase [Bradyrhizobium elkanii]
Culture01_4005_59	Culture01_4005	56687	59740	499635012	isoleucyl-tRNA synthetase [Nitrobacter winogradskyi]_x0001_
Culture01_4005_60	Culture01_4005	59737	60234	750393216	lipoprotein signal peptidase [Nitrobacter sp. Nb-311A]
Culture01_4005_61	Culture01_4005	60313	61047	750393219	signal peptide protein [Nitrobacter sp. Nb-311A]
Culture01_4005_62	Culture01_4005	61502	62896	497484599	zinc protease [Nitrobacter sp. Nb-311A]_x0001_
Culture01_4005_63	Culture01_4005	62893	64287	497484600	zinc protease [Nitrobacter sp. Nb-311A]_x0001_
Culture01_4005_64	Culture01_4005	64367	64786	497484601	peptide chain release factor I [Nitrobacter sp. Nb-311A]_x0001_
Culture01_4005_65	Culture01_4005	64962	66773	497484602	DNA mismatch repair protein MutL [Nitrobacter sp. Nb-311A]_x0001_
Culture01_4005_66	Culture01_4005	66834	67388	497484603	DNA methyltransferase [Nitrobacter sp. Nb-311A]_x0001_
Culture01_4005_67	Culture01_4005	67392	69524	499635020	pseudouridine synthase [Nitrobacter winogradskyi]_x0001_
Culture01_4005_68	Culture01_4005	69601	70047	499635021	CMP deaminase [Nitrobacter winogradskyi]_x0001_
Culture01_4005_69	Culture01_4005	70061	71338	497484607	phosphoribosylamine--glycine ligase [Nitrobacter sp. Nb-311A]_x0001_
Culture01_4005_70	Culture01_4005	71420	73036	499635023	exodeoxyribonuclease VII large subunit [Nitrobacter winogradskyi]_x0001_
Culture01_4005_71	Culture01_4005	73178	73405	750393222	hypothetical protein [Nitrobacter sp. Nb-311A]
Culture01_4005_72	Culture01_4005	73506	74477	497484610	tetraacyldisaccharide 4'-kinase [Nitrobacter sp. Nb-311A]_x0001_
Culture01_4005_73	Culture01_4005	74506	75834	497484611	3-deoxy-D-manno-octulosonic acid transferase [Nitrobacter sp. Nb-311A]_x0001_
Culture01_4005_74	Culture01_4005	75956	76690	497484612	hypothetical protein [Nitrobacter sp. Nb-311A]_x0001_
Culture01_4005_75	Culture01_4005	76687	76938	499830837	inositol monophosphatase [Nitrobacter hamburgensis]_x0001_
Culture01_4005_76	Culture01_4005	77000	77830	497484614	inositol monophosphatase [Nitrobacter sp. Nb-311A]_x0001_
Culture01_4005_77	Culture01_4005	77951	79339	752697572	modulator protein [Nitrobacter winogradskyi]
Culture01_4005_78	Culture01_4005	79624	80145	499830840	hypothetical protein [Nitrobacter hamburgensis]_x0001_
Culture01_4005_79	Culture01_4005	80215	81138	497484617	4-hydroxybenzoate polyprenyltransferase [Nitrobacter sp. Nb-311A]_x0001_
Culture01_4005_80	Culture01_4005	81149	81922	85698658	hypothetical protein NB311A_14707 [Nitrobacter sp. Nb-311A]
Culture01_4005_81	Culture01_4005	82215	82964	85698659	hypothetical protein NB311A_14712 [Nitrobacter sp. Nb-311A]
Culture01_4005_82	Culture01_4005	83215	85371	497484620	TonB-denpendent receptor [Nitrobacter sp. Nb-311A]_x0001_
Culture01_4005_83	Culture01_4005	85550	86755	85698661	ATP phosphoribosyltransferase regulatory subunit [Nitrobacter sp. Nb-311A]
Culture01_4005_84	Culture01_4005	86752	87729	497484622	ATP phosphoribosyltransferase [Nitrobacter sp. Nb-311A]_x0001_
Culture01_4005_85	Culture01_4005	87814	88860	497484623	bactoprenol glucosyl transferase [Nitrobacter sp. Nb-311A]_x0001_
Culture01_4005_86	Culture01_4005	88857	89702	497484624	hypothetical protein [Nitrobacter sp. Nb-311A]_x0001_
Culture01_4005_87	Culture01_4005	89792	90580	497484625	ABC transporter substrate-binding protein [Nitrobacter sp. Nb-311A]_x0001_
Culture01_4005_88	Culture01_4005	90738	91517	499830849	hypothetical protein [Nitrobacter hamburgensis]_x0001_
Culture01_4005_90	Culture01_4005	91812	92597	497484629	hypothetical protein [Nitrobacter sp. Nb-311A]_x0001_
Culture01_4005_91	Culture01_4005	92682	93233	91801554	conserved hypothetical protein [Nitrobacter hamburgensis X14]
Culture01_4005_92	Culture01_4005	93541	93837	497484631	molecular chaperone GroES [Nitrobacter sp. Nb-311A]_x0001_
Culture01_4005_93	Culture01_4005	94016	95662	499635044	molecular chaperone GroEL [Nitrobacter winogradskyi]_x0001_
Culture01_4005_94	Culture01_4005	95769	96965	497484634	signal peptide protein [Nitrobacter sp. Nb-311A]_x0001_
Culture01_4005_95	Culture01_4005	97126	97533	497484635	hypothetical protein [Nitrobacter sp. Nb-311A]_x0001_
Culture01_4005_96	Culture01_4005	97949	98383	499635048	hypothetical protein [Nitrobacter winogradskyi]_x0001_
Culture01_4005_97	Culture01_4005	98407	99720	497484637	2-hydroxy-acid oxidase [Nitrobacter sp. Nb-311A]_x0001_
Culture01_4005_98	Culture01_4005	99720	100958	750393233	2-hydroxy-acid oxidase [Nitrobacter sp. Nb-311A]
Culture01_4005_99	Culture01_4005	101137	102630	499635051	FAD-binding protein [Nitrobacter winogradskyi]_x0001_
Culture01_4005_100	Culture01_4005	102967	103368	497484640	cystathionine beta-lyase [Nitrobacter sp. Nb-311A]_x0001_
Culture01_4005_101	Culture01_4005	103387	104061	497484641	TetR family transcriptional regulator [Nitrobacter sp. Nb-311A]_x0001_
Culture01_4005_103	Culture01_4005	104766	105143	497484643	hypothetical protein [Nitrobacter sp. Nb-311A]_x0001_
Culture01_4005_104	Culture01_4005	105247	107424	499635055	glycyl-tRNA synthetase subunit beta [Nitrobacter winogradskyi]_x0001_
Culture01_4005_105	Culture01_4005	107428	108372	750393086	glycyl-tRNA synthetase subunit alpha [Nitrobacter sp. Nb-311A]
Culture01_4005_107	Culture01_4005	108824	109702	85698688	peptidase S49 [Nitrobacter sp. Nb-311A]
Culture01_4005_108	Culture01_4005	109884	110654	497484649	methyltransferase [Nitrobacter sp. Nb-311A]_x0001_
Culture01_4005_109	Culture01_4005	110635	110919	497484650	hypothetical protein [Nitrobacter sp. Nb-311A]_x0001_
Culture01_4005_110	Culture01_4005	111026	112036	497484651	polyprenyl synthetase [Nitrobacter sp. Nb-311A]_x0001_
Culture01_4005_111	Culture01_4005	112092	113018	85698692	4-diphosphocytidyl-2C-methyl-D-erythritol kinase [Nitrobacter sp. Nb-311A]
Culture01_4005_112	Culture01_4005	113164	114945	497484653	hypothetical protein [Nitrobacter sp. Nb-311A]_x0001_
Culture01_4005_113	Culture01_4005	115273	116934	497484654	electron transfer flavoprotein-ubiquinone oxidoreductase [Nitrobacter sp. Nb-311A]_x0001_
Culture01_4005_114	Culture01_4005	117089	117943	499635065	DNA polymerase [Nitrobacter winogradskyi]_x0001_
Culture01_4005_115	Culture01_4005	117953	119458	497484656	hypothetical protein [Nitrobacter sp. Nb-311A]_x0001_
Culture01_4005_116	Culture01_4005	119580	120230	499635067	ribonuclease HII [Nitrobacter winogradskyi]_x0001_
Culture01_4005_117	Culture01_4005	120432	121592	497484658	DNA repair photolyase [Nitrobacter sp. Nb-311A]_x0001_
Culture01_4005_118	Culture01_4005	121660	122223	497484659	molybdopterin biosynthesis protein B [Nitrobacter sp. Nb-311A]_x0001_
Culture01_4005_120	Culture01_4005	122416	123339	497484660	metalloprotease [Nitrobacter sp. Nb-311A]_x0001_
Culture01_4005_121	Culture01_4005	123880	125010	499830882	modification methylase [Nitrobacter hamburgensis]_x0001_
Culture01_4005_122	Culture01_4005	125164	125850	497484662	glutathione S-transferase [Nitrobacter sp. Nb-311A]_x0001_
Culture01_4005_123	Culture01_4005	125885	127060	750393093	adenine glycosylase [Nitrobacter sp. Nb-311A]
Culture01_4005_124	Culture01_4005	127230	127709	497484664	hypothetical protein [Nitrobacter sp. Nb-311A]_x0001_
Culture01_4005_125	Culture01_4005	127814	128470	497484665	Protein-disulfide isomerase [Nitrobacter sp. Nb-311A]_x0001_
Culture01_4005_126	Culture01_4005	128776	132282	499635077	chromosome segregation protein SMC [Nitrobacter winogradskyi]_x0001_
Culture01_4005_127	Culture01_4005	132325	133368	499635078	hypothetical protein [Nitrobacter winogradskyi]_x0001_
Culture01_4005_128	Culture01_4005	133380	133808	85698708	hypothetical protein NB311A_14957 [Nitrobacter sp. Nb-311A]
Culture01_4005_129	Culture01_4005	133998	134558	750393096	membrane protein [Nitrobacter sp. Nb-311A]
Culture01_4005_130	Culture01_4005	134768	135898	497484670	peptidase M48 [Nitrobacter sp. Nb-311A]_x0001_
Culture01_4005_131	Culture01_4005	136221	136979	85698713	hypothetical protein NB311A_14982 [Nitrobacter sp. Nb-311A]
Culture01_4005_132	Culture01_4005	137093	137758	85698714	hypothetical protein NB311A_14987 [Nitrobacter sp. Nb-311A]
Culture01_4009_1	Culture01_4009	3	605	497484798	Holliday junction DNA helicase RuvB [Nitrobacter sp. Nb-311A]_x0001_
Culture01_4009_2	Culture01_4009	602	1219	499635190	Holliday junction DNA helicase RuvA [Nitrobacter winogradskyi]_x0001_
Culture01_4009_3	Culture01_4009	1216	1737	85698842	Holliday junction resolvase [Nitrobacter sp. Nb-311A]
Culture01_4009_5	Culture01_4009	2034	2639	499635192	hypothetical protein [Nitrobacter winogradskyi]_x0001_
Culture01_4009_6	Culture01_4009	2765	3178	654699800	hypothetical protein [Bradyrhizobium japonicum]
Culture01_4009_7	Culture01_4009	3250	4620	497484801	magnesium transporter [Nitrobacter sp. Nb-311A]_x0001_
Culture01_4009_8	Culture01_4009	4888	5358	497484802	DNA mismatch repair protein MutT [Nitrobacter sp. Nb-311A]_x0001_
Culture01_4009_9	Culture01_4009	5355	6101	499831162	transcriptional regulator [Nitrobacter hamburgensis]_x0001_
Culture01_4009_10	Culture01_4009	6265	7086	499831164	metallophosphoesterase [Nitrobacter hamburgensis]_x0001_
Culture01_4009_11	Culture01_4009	7089	7640	499831165	5-formyltetrahydrofolate cyclo-ligase [Nitrobacter hamburgensis]_x0001_
Culture01_4009_12	Culture01_4009	8226	8609	497484806	MULTISPECIES: hypothetical protein [Nitrobacter]_x0001_
Culture01_4009_13	Culture01_4009	8606	8938	497484807	hypothetical protein [Nitrobacter sp. Nb-311A]_x0001_
Culture01_4009_14	Culture01_4009	9220	11205	497484808	transketolase [Nitrobacter sp. Nb-311A]_x0001_
Culture01_4009_15	Culture01_4009	11528	12535	499635199	glyceraldehyde-3-phosphate dehydrogenase [Nitrobacter winogradskyi]_x0001_
Culture01_4009_16	Culture01_4009	12672	13868	497484810	phosphoglycerate kinase [Nitrobacter sp. Nb-311A]_x0001_
Culture01_4009_17	Culture01_4009	13974	15023	85698853	fructose-bisphosphate aldolase, class-I [Nitrobacter sp. Nb-311A]
Culture01_4009_18	Culture01_4009	15291	15986	497484814	thiamine monophosphate synthase [Nitrobacter sp. Nb-311A]_x0001_
Culture01_4009_19	Culture01_4009	15983	17023	497484815	hypothetical protein [Nitrobacter sp. Nb-311A]_x0001_
Culture01_4009_20	Culture01_4009	17085	17876	497484816	inositol monophosphatase [Nitrobacter sp. Nb-311A]_x0001_
Culture01_4009_21	Culture01_4009	18051	21212	497484817	acriflavine resistance protein B [Nitrobacter sp. Nb-311A]_x0001_
Culture01_4009_22	Culture01_4009	21216	22424	85698861	Secretion protein HlyD [Nitrobacter sp. Nb-311A]
Culture01_4009_23	Culture01_4009	23017	24090	497484821	flagellar motor protein MotA [Nitrobacter sp. Nb-311A]_x0001_
Culture01_4009_24	Culture01_4009	24101	25129	497484822	hypothetical protein [Nitrobacter sp. Nb-311A]_x0001_
Culture01_4009_25	Culture01_4009	25174	25635	499831180	N-acetyltransferase GCN5 [Nitrobacter hamburgensis]_x0001_
Culture01_4009_26	Culture01_4009	25673	27457	85698866	ABC transporter, ATP-binding/permease protein [Nitrobacter sp. Nb-311A]
Culture01_4009_27	Culture01_4009	27708	27935	499831182	50S ribosomal protein L31 [Nitrobacter hamburgensis]_x0001_
Culture01_4009_28	Culture01_4009	28137	28658	497484826	AraC family transcriptional regulator [Nitrobacter sp. Nb-311A]_x0001_
Culture01_4009_30	Culture01_4009	29604	30581	85698870	Zinc-containing alcohol dehydrogenase superfamily protein [Nitrobacter sp. Nb-311A]
Culture01_4009_31	Culture01_4009	30841	33675	85698871	multi-sensor diguanylate cyclase/phophodiesterase [Nitrobacter sp. Nb-311A]
Culture01_4009_32	Culture01_4009	33720	34370	497484830	hypothetical protein [Nitrobacter sp. Nb-311A]_x0001_
Culture01_4009_33	Culture01_4009	34510	35352	497484831	protein involved in C cytochrome biogenesis [Nitrobacter sp. Nb-311A]_x0001_
Culture01_4009_34	Culture01_4009	35469	36836	85698874	Polysaccharide biosynthesis protein [Nitrobacter sp. Nb-311A]
Culture01_4009_35	Culture01_4009	36873	37661	497484833	cytochrome C biogenesis protein CcmE [Nitrobacter sp. Nb-311A]_x0001_
Culture01_4009_36	Culture01_4009	37829	38338	497484834	hypothetical protein [Nitrobacter sp. Nb-311A]_x0001_
Culture01_4009_37	Culture01_4009	38699	39748	497484835	sulfate ABC transporter ATP-binding protein [Nitrobacter sp. Nb-311A]_x0001_
Culture01_4009_38	Culture01_4009	39738	40607	85698878	Sulfate ABC transporter, permease protein CysW [Nitrobacter sp. Nb-311A]
Culture01_4009_39	Culture01_4009	40619	41404	497484837	sulfate/thiosulfate transporter subunit [Nitrobacter sp. Nb-311A]_x0001_
Culture01_4009_40	Culture01_4009	41486	42475	750393316	ABC transporter permease [Nitrobacter sp. Nb-311A]
Culture01_4009_41	Culture01_4009	42604	43368	91801915	phosphoadenylylsulfate reductase (thioredoxin) [Nitrobacter hamburgensis X14]
Culture01_4009_42	Culture01_4009	43365	44801	497484840	siroheme synthase [Nitrobacter sp. Nb-311A]_x0001_
Culture01_4009_43	Culture01_4009	45056	45862	74421817	sulfate adenylyltransferase subunit 2 [Nitrobacter winogradskyi Nb-255]
Culture01_4009_44	Culture01_4009	45890	47815	497484842	adenylylsulfate kinase [Nitrobacter sp. Nb-311A]_x0001_
Culture01_4009_45	Culture01_4009	48114	50300	85698885	malate synthase [Nitrobacter sp. Nb-311A]
Culture01_4009_46	Culture01_4009	50552	50917	497484845	hypothetical protein [Nitrobacter sp. Nb-311A]_x0001_
Culture01_4009_47	Culture01_4009	51016	51453	497484846	signal peptide protein [Nitrobacter sp. Nb-311A]_x0001_
Culture01_4009_48	Culture01_4009	52089	52895	499635235	chemotaxis protein CheY [Nitrobacter winogradskyi]_x0001_
Culture01_4009_49	Culture01_4009	53352	53897	497484851	RNA polymerase sigma factor [Nitrobacter sp. Nb-311A]_x0001_
Culture01_4009_50	Culture01_4009	54011	55660	497484852	histidine kinase [Nitrobacter sp. Nb-311A]_x0001_
Culture01_4009_51	Culture01_4009	55914	57182	497484853	2-methylthioadenine synthase [Nitrobacter sp. Nb-311A]_x0001_
Culture01_4009_52	Culture01_4009	57182	58054	74421830	diaminopimelate epimerase [Nitrobacter winogradskyi Nb-255]
Culture01_4009_53	Culture01_4009	58337	59065	499635241	transcriptional regulator [Nitrobacter winogradskyi]_x0001_
Culture01_4009_54	Culture01_4009	59074	59778	85698899	hypothetical protein NB311A_15912 [Nitrobacter sp. Nb-311A]
Culture01_4009_55	Culture01_4009	60106	61641	497484858	signal recognition particle protein [Nitrobacter sp. Nb-311A]_x0001_
Culture01_4009_56	Culture01_4009	61720	62052	499635244	30S ribosomal protein S16 [Nitrobacter winogradskyi]_x0001_
Culture01_4009_57	Culture01_4009	62065	62586	499831216	16S rRNA-processing protein RimM [Nitrobacter hamburgensis]_x0001_
Culture01_4009_58	Culture01_4009	62714	63430	499635246	tRNA (guanine-N1)-methyltransferase [Nitrobacter winogradskyi]_x0001_
Culture01_4009_59	Culture01_4009	63655	64050	85698904	50S ribosomal protein L19 [Nitrobacter sp. Nb-311A]
Culture01_4009_60	Culture01_4009	64409	65815	497484864	isopropylmalate isomerase [Nitrobacter sp. Nb-311A]_x0001_
Culture01_4009_61	Culture01_4009	66157	66663	497484865	hypothetical protein [Nitrobacter sp. Nb-311A]_x0001_
Culture01_4009_64	Culture01_4009	67772	68074	497484868	hypothetical protein [Nitrobacter sp. Nb-311A]_x0001_
Culture01_4009_65	Culture01_4009	68232	68633	499831225	Zn-dependent protease [Nitrobacter hamburgensis]_x0001_
Culture01_4009_66	Culture01_4009	68817	69422	499831226	isopropylmalate isomerase [Nitrobacter hamburgensis]_x0001_
Culture01_4009_67	Culture01_4009	69653	70687	497484871	aspartate-semialdehyde dehydrogenase [Nitrobacter sp. Nb-311A]_x0001_
Culture01_4009_68	Culture01_4009	71174	71554	497484873	hypothetical protein [Nitrobacter sp. Nb-311A]_x0001_
Culture01_4009_69	Culture01_4009	71654	72766	499635259	3-isopropylmalate dehydrogenase [Nitrobacter winogradskyi]_x0001_
Culture01_4009_71	Culture01_4009	73066	73575	497484877	superoxide dismutase [Nitrobacter sp. Nb-311A]_x0001_
Culture01_4009_72	Culture01_4009	73671	74456	497484878	hypothetical protein [Nitrobacter sp. Nb-311A]_x0001_
Culture01_4009_73	Culture01_4009	74471	75100	497484879	cytochrome B561 [Nitrobacter sp. Nb-311A]_x0001_
Culture01_4009_74	Culture01_4009	75341	76858	497484881	malonyl-CoA synthase [Nitrobacter sp. Nb-311A]_x0001_
Culture01_4009_75	Culture01_4009	77124	77462	497484882	succinate dehydrogenase [Nitrobacter sp. Nb-311A]_x0001_
Culture01_4009_76	Culture01_4009	77459	77866	497484883	succinate dehydrogenase [Nitrobacter sp. Nb-311A]_x0001_
Culture01_4009_77	Culture01_4009	77870	79693	497484884	succinate dehydrogenase [Nitrobacter sp. Nb-311A]_x0001_
Culture01_4009_78	Culture01_4009	79801	80583	497484885	succinate dehydrogenase iron-sulfur subunit [Nitrobacter sp. Nb-311A]_x0001_
Culture01_4009_79	Culture01_4009	82282	83385	74421856	OmpA/MotB [Nitrobacter winogradskyi Nb-255]
Culture01_4009_80	Culture01_4009	83491	84720	499635267	argininosuccinate synthase [Nitrobacter winogradskyi]_x0001_
Culture01_4009_81	Culture01_4009	84793	85581	499635268	phosphoesterase [Nitrobacter winogradskyi]_x0001_
Culture01_4009_82	Culture01_4009	85629	86105	499635269	hypothetical protein [Nitrobacter winogradskyi]_x0001_
Culture01_4009_83	Culture01_4009	86174	87451	85698934	hypothetical protein NB311A_16087 [Nitrobacter sp. Nb-311A]
Culture01_4009_84	Culture01_4009	87509	88057	74421861	conserved hypothetical protein [Nitrobacter winogradskyi Nb-255]
Culture01_4009_85	Culture01_4009	88317	88697	85698937	hypothetical protein NB311A_16102 [Nitrobacter sp. Nb-311A]
Culture01_4009_86	Culture01_4009	88780	89085	499635273	pterin-4-alpha-carbinolamine dehydratase [Nitrobacter winogradskyi]_x0001_
Culture01_4009_87	Culture01_4009	89495	89833	497484897	ferredoxin [Nitrobacter sp. Nb-311A]_x0001_
Culture01_4009_88	Culture01_4009	89840	90220	497484898	hypothetical protein [Nitrobacter sp. Nb-311A]_x0001_
Culture01_4009_89	Culture01_4009	90352	92265	497484899	heat shock protein Hsp90 [Nitrobacter sp. Nb-311A]_x0001_
Culture01_4009_90	Culture01_4009	92759	93421	74421867	PepSY-associated TM helix [Nitrobacter winogradskyi Nb-255]
Culture01_4009_91	Culture01_4009	93432	93944	497484902	hypothetical protein [Nitrobacter sp. Nb-311A]_x0001_
Culture01_4009_92	Culture01_4009	94108	94917	497484904	ABC transporter permease [Nitrobacter sp. Nb-311A]_x0001_
Culture01_4009_93	Culture01_4009	94926	95942	497484905	thiamine biosynthesis protein ApbE [Nitrobacter sp. Nb-311A]_x0001_
Culture01_4009_94	Culture01_4009	96117	97208	85698954	dihydrouridine synthase TIM-barrel protein yjbN [Nitrobacter sp. Nb-311A]
Culture01_4009_95	Culture01_4009	98706	99371	654698032	hypothetical protein [Bradyrhizobium japonicum]_x0001_
Culture01_4009_97	Culture01_4009	100267	100536	499633928	hypothetical protein [Nitrobacter winogradskyi]_x0001_
Culture01_4009_98	Culture01_4009	100918	101286	499829716	hypothetical protein [Nitrobacter hamburgensis]_x0001_
Culture01_4009_99	Culture01_4009	101404	103710	499403139	hypothetical protein [Bradyrhizobium diazoefficiens]_x0001_
Culture01_4009_101	Culture01_4009	104487	106823	752697657	5-methyltetrahydropteroyltriglutamate--homocysteine methyltransferase [Nitrobacter winogradskyi]
Culture01_4009_102	Culture01_4009	107173	107841	752698222	hypothetical protein [Nitrobacter winogradskyi]
Culture01_4009_103	Culture01_4009	108413	111259	750391940	ribonucleotide-diphosphate reductase subunit alpha [Nitrobacter sp. Nb-311A]
Culture01_4009_104	Culture01_4009	111318	112493	74421938	ribonucleotide reductase [Nitrobacter winogradskyi Nb-255]
Culture01_4009_105	Culture01_4009	112543	113775	518000008	membrane protein [Pseudaminobacter salicylatoxidans]
Culture01_4009_106	Culture01_4009	113992	114438	499831299	3-demethylubiquinone-9 3-methyltransferase [Nitrobacter hamburgensis]_x0001_
Culture01_4009_107	Culture01_4009	114574	115044	499635331	MarR family transcriptional regulator [Nitrobacter winogradskyi]_x0001_
Culture01_4009_108	Culture01_4009	115247	115855	499635330	hypothetical protein [Nitrobacter winogradskyi]_x0001_
Culture01_4009_109	Culture01_4009	115964	117004	497482775	hydrolase glyoxylase [Nitrobacter sp. Nb-311A]_x0001_
Culture01_4009_110	Culture01_4009	117274	117726	750391908	hypothetical protein [Nitrobacter sp. Nb-311A]
Culture01_4009_111	Culture01_4009	118254	118925	497482772	hypothetical protein [Nitrobacter sp. Nb-311A]_x0001_
Culture01_4009_112	Culture01_4009	118956	119993	497482771	amino acid ABC transporter substrate-binding protein [Nitrobacter sp. Nb-311A]_x0001_
Culture01_4009_113	Culture01_4009	120048	120650	497482770	hypothetical protein [Nitrobacter sp. Nb-311A]_x0001_
Culture01_4009_114	Culture01_4009	120965	122314	497484461	RND transporter [Nitrobacter sp. Nb-311A]_x0001_
Culture01_4009_115	Culture01_4009	122559	125711	497484462	cytochrome C peroxidase [Nitrobacter sp. Nb-311A]_x0001_
Culture01_4009_116	Culture01_4009	125730	126986	497484463	hemolysin secretion protein D [Nitrobacter sp. Nb-311A]_x0001_
Culture01_4009_117	Culture01_4009	127288	127962	497484464	transcriptional regulator [Nitrobacter sp. Nb-311A]_x0001_
Culture01_4009_118	Culture01_4009	127963	129333	497484465	histidine kinase [Nitrobacter sp. Nb-311A]_x0001_
Culture01_4009_121	Culture01_4009	130453	132075	499830661	glycosyl transferase family 1 [Nitrobacter hamburgensis]_x0001_
Culture01_4009_122	Culture01_4009	132417	133571	737666155	MULTISPECIES: peptidase [Bradyrhizobium]_x0001_
Culture01_4009_123	Culture01_4009	133584	135926	740586827	ferrichrome-iron receptor [Bradyrhizobium elkanii]
Culture01_4009_124	Culture01_4009	136756	137682	497483871	hypothetical protein [Nitrobacter sp. Nb-311A]_x0001_
Culture01_4009_125	Culture01_4009	137679	139325	499828714	hypothetical protein [Nitrobacter hamburgensis]_x0001_
Culture01_4009_126	Culture01_4009	139449	140789	499828713	ATPase [Nitrobacter hamburgensis]_x0001_
Culture01_4101_1	Culture01_4101	2	919	499828984	polysaccharide biosynthesis protein CapD [Nitrobacter hamburgensis]_x0001_
Culture01_4101_3	Culture01_4101	1611	3851	497486134	hypothetical protein [Nitrobacter sp. Nb-311A]_x0001_
Culture01_4101_4	Culture01_4101	3883	4608	750394245	hypothetical protein [Nitrobacter sp. Nb-311A]
Culture01_4143_1	Culture01_4143	2	313	648667846	transposase [Sphingomonas sp. PR090111-T3T-6A]
Culture01_4143_5	Culture01_4143	2061	2549	497483391	hypothetical protein [Nitrobacter sp. Nb-311A]_x0001_
Culture01_4143_11	Culture01_4143	4783	5244	653450490	heat-shock protein [Bradyrhizobium sp. URHA0002]
Culture01_4143_13	Culture01_4143	6589	6876	497483837	hypothetical protein [Nitrobacter sp. Nb-311A]_x0001_
Culture01_4143_15	Culture01_4143	7745	8167	499829864	nucleoside diphosphate kinase [Nitrobacter hamburgensis]_x0001_
Culture01_4143_19	Culture01_4143	10483	12678	740601083	histidine kinase [Bradyrhizobium elkanii]
Culture01_4143_21	Culture01_4143	13253	13639	499824168	glycosyl transferase family protein [Nitrobacter hamburgensis]_x0001_
Culture01_4143_29	Culture01_4143	16823	17266	657878570	hypothetical protein [Bradyrhizobium sp. URHD0069]
Culture01_4143_32	Culture01_4143	18269	19285	499831520	transposase, IS116/IS110/IS902 family [Nitrobacter hamburgensis]_x0001_
Culture01_4143_33	Culture01_4143	19732	20781	499824227	transposase, IS116/IS110/IS902 family [Nitrobacter hamburgensis]_x0001_
Culture01_4143_34	Culture01_4143	21031	21360	85696331	Integrase, catalytic domain [Nitrobacter sp. Nb-311A]
Culture01_4144_1	Culture01_4144	2	283	85697125	probable HspC2 heat shock protein [Nitrobacter sp. Nb-311A]
Culture01_4144_2	Culture01_4144	451	1434	499829670	alcohol dehydrogenase [Nitrobacter hamburgensis]_x0001_
Culture01_4144_3	Culture01_4144	1447	3045	91800348	conserved hypothetical protein [Nitrobacter hamburgensis X14]
Culture01_4144_4	Culture01_4144	3042	3980	499829668	hypothetical protein [Nitrobacter hamburgensis]_x0001_
Culture01_4144_5	Culture01_4144	4039	4866	497485003	universal stress protein UspA [Nitrobacter sp. Nb-311A]_x0001_
Culture01_4144_6	Culture01_4144	5122	5850	497485002	hypothetical protein [Nitrobacter sp. Nb-311A]_x0001_
Culture01_4144_7	Culture01_4144	5986	6528	752711782	hypothetical protein, partial [Nitrobacter hamburgensis]
Culture01_4144_8	Culture01_4144	6729	7121	752710789	hypothetical protein [Nitrobacter hamburgensis]
Culture01_4144_10	Culture01_4144	7623	8015	499829663	transport-associated [Nitrobacter hamburgensis]_x0001_
Culture01_4144_12	Culture01_4144	8458	9993	752710788	histidine kinase [Nitrobacter hamburgensis]
Culture01_4144_13	Culture01_4144	9983	10600	499829660	chemotaxis protein CheY [Nitrobacter hamburgensis]_x0001_
Culture01_4144_14	Culture01_4144	10670	11065	499829659	chemotaxis protein CheY [Nitrobacter hamburgensis]_x0001_
Culture01_4144_15	Culture01_4144	11371	12621	497484997	membrane protein [Nitrobacter sp. Nb-311A]_x0001_
Culture01_4144_17	Culture01_4144	13460	14428	91800333	Pyrimidine nucleoside phosphorylase-like protein [Nitrobacter hamburgensis X14]
Culture01_4144_18	Culture01_4144	14576	15115	499829653	phosphoribosylpyrophosphate synthetase [Nitrobacter hamburgensis]_x0001_
Culture01_4144_20	Culture01_4144	15345	15677	499829652	beta-lactamase [Nitrobacter hamburgensis]_x0001_
Culture01_4144_21	Culture01_4144	15629	16906	499829652	beta-lactamase [Nitrobacter hamburgensis]_x0001_
Culture01_4144_24	Culture01_4144	17491	18171	91800330	putative signal-transduction protein with CBS domains [Nitrobacter hamburgensis X14]
Culture01_4144_28	Culture01_4144	19792	20259	497482674	hypothetical protein [Nitrobacter sp. Nb-311A]_x0001_
Culture01_4144_29	Culture01_4144	20256	21254	497482673	recombinase [Nitrobacter sp. Nb-311A]_x0001_
Culture01_4148_1	Culture01_4148	91	1089	85699558	phosphate ABC transporter, permease protein PstC [Nitrobacter sp. Nb-311A]
Culture01_4148_2	Culture01_4148	1172	2017	497484289	phosphate transporter permease subunit PtsA [Nitrobacter sp. Nb-311A]_x0001_
Culture01_4148_3	Culture01_4148	2014	2832	499633103	phosphate ABC transporter ATP-binding protein [Nitrobacter winogradskyi]_x0001_
Culture01_4148_4	Culture01_4148	2866	3582	499633104	PhoU family transcriptional regulator [Nitrobacter winogradskyi]_x0001_
Culture01_4148_5	Culture01_4148	3604	4308	497484286	chemotaxis protein CheY [Nitrobacter sp. Nb-311A]_x0001_
Culture01_4148_6	Culture01_4148	4550	5056	497484285	GcrA cell cycle regulator [Nitrobacter sp. Nb-311A]_x0001_
Culture01_4148_7	Culture01_4148	5512	6723	497484284	acetylornithine aminotransferase [Nitrobacter sp. Nb-311A]_x0001_
Culture01_4148_8	Culture01_4148	6720	7646	499828501	ornithine carbamoyltransferase [Nitrobacter hamburgensis]_x0001_
Culture01_4148_9	Culture01_4148	7703	8974	497484282	hypothetical protein [Nitrobacter sp. Nb-311A]_x0001_
Culture01_4148_10	Culture01_4148	9166	9771	497484280	hypothetical protein [Nitrobacter sp. Nb-311A]_x0001_
Culture01_4148_11	Culture01_4148	9882	10388	497484279	hypothetical protein [Nitrobacter sp. Nb-311A]_x0001_
Culture01_4148_12	Culture01_4148	10406	11230	497484278	inositol monophosphatase [Nitrobacter sp. Nb-311A]_x0001_
Culture01_4148_13	Culture01_4148	11384	12031	497484277	histidine phosphotransferase [Nitrobacter sp. Nb-311A]_x0001_
Culture01_4148_14	Culture01_4148	12244	14919	85699544	CheA kinase [Nitrobacter sp. Nb-311A]
Culture01_4148_15	Culture01_4148	14931	15401	85699543	CheW-like protein [Nitrobacter sp. Nb-311A]
Culture01_4148_16	Culture01_4148	15453	15818	497484274	chemotaxis protein CheY [Nitrobacter sp. Nb-311A]_x0001_
Culture01_4148_17	Culture01_4148	15935	17026	85699541	chemotaxis-specific methylesterase [Nitrobacter sp. Nb-311A]
Culture01_4148_18	Culture01_4148	17023	17889	497484272	chemotaxis protein CheR [Nitrobacter sp. Nb-311A]_x0001_
Culture01_4148_19	Culture01_4148	17982	19139	654895700	hypothetical protein [Bradyrhizobium elkanii]
Culture01_4148_21	Culture01_4148	19546	19950	515311165	membrane protein [Bradyrhizobium elkanii]
Culture01_4148_22	Culture01_4148	20134	20835	497484270	chemotaxis protein CheY [Nitrobacter sp. Nb-311A]_x0001_
Culture01_4174_2	Culture01_4174	742	1008	497483942	transposase [Nitrobacter sp. Nb-311A]_x0001_
Culture01_4174_3	Culture01_4174	1074	1844	85695610	transposase [Nitrobacter sp. Nb-311A]
Culture01_4174_4	Culture01_4174	2407	3666	739522400	hypothetical protein [Sinorhizobium americanum]_x0001_
Culture01_4174_5	Culture01_4174	3864	4724	499984003	DNA-binding protein [Rhodopseudomonas palustris]_x0001_
Culture01_4174_8	Culture01_4174	5506	6090	749829069	integrase [Afipia clevelandensis]
Culture01_4174_9	Culture01_4174	6376	7596	653444442	membrane protein [Bradyrhizobium sp. URHA0002]
Culture01_4174_15	Culture01_4174	13288	14184	91798656	Mg chelatase-related protein [Nitrobacter hamburgensis X14]
Culture01_4174_16	Culture01_4174	14515	16686	497482348	histidine kinase [Nitrobacter sp. Nb-311A]_x0001_
Culture01_4174_17	Culture01_4174	16786	17742	499632723	pantothenate kinase [Nitrobacter winogradskyi]_x0001_
Culture01_4174_18	Culture01_4174	17825	18148	499632724	phosphoribosyl-ATP pyrophosphatase [Nitrobacter winogradskyi]
Culture01_4174_19	Culture01_4174	18225	19001	499828000	imidazole glycerol phosphate synthase [Nitrobacter hamburgensis]_x0001_
Culture01_4174_20	Culture01_4174	19017	19766	91206935	HIS4_NITWN RecName: Full=1-(5-phosphoribosyl)-5-[(5-phosphoribosylamino)methylideneamino] imidazole-4-carboxamide isomerase; AltName: Full=Phosphoribosylformimino-5-aminoimidazole carboxamide ribotide isomerase [Nitrobacter winogradskyi Nb-255]_x0001_
Culture01_4174_21	Culture01_4174	19754	20404	499827998	imidazole glycerol phosphate synthase [Nitrobacter hamburgensis]_x0001_
Culture01_4174_22	Culture01_4174	20401	20925	497482354	hypothetical protein [Nitrobacter sp. Nb-311A]_x0001_
Culture01_4174_23	Culture01_4174	20952	21545	85699206	imidazoleglycerol-phosphate dehydratase [Nitrobacter sp. Nb-311A]
Culture01_4174_24	Culture01_4174	21908	22462	499827995	peptidase [Nitrobacter hamburgensis]_x0001_
Culture01_4174_25	Culture01_4174	22613	23911	497482357	ATP-dependent protease [Nitrobacter sp. Nb-311A]_x0001_
Culture01_4174_27	Culture01_4174	24006	24587	497482358	DNA mismatch repair protein MutS [Nitrobacter sp. Nb-311A]_x0001_
Culture01_4174_28	Culture01_4174	24584	26038	750391763	lytic transglycosylase [Nitrobacter sp. Nb-311A]
Culture01_4174_29	Culture01_4174	26070	26843	497482360	calcium-binding protein [Nitrobacter sp. Nb-311A]_x0001_
Culture01_4174_30	Culture01_4174	27195	27683	499632709	preprotein translocase subunit SecB [Nitrobacter winogradskyi]_x0001_
Culture01_4174_31	Culture01_4174	27823	28566	499632708	DNA polymerase III subunit epsilon [Nitrobacter winogradskyi]_x0001_
Culture01_4174_32	Culture01_4174	28688	29287	497482363	dephospho-CoA kinase [Nitrobacter sp. Nb-311A]_x0001_
Culture01_4174_33	Culture01_4174	29304	29912	497482364	septum formation protein Maf [Nitrobacter sp. Nb-311A]_x0001_
Culture01_4174_34	Culture01_4174	29920	30762	499632705	hypothetical protein [Nitrobacter winogradskyi]_x0001_
Culture01_4174_35	Culture01_4174	31189	31611	497482366	membrane protein [Nitrobacter sp. Nb-311A]_x0001_
Culture01_4174_36	Culture01_4174	31891	33156	497482367	transcription termination factor Rho [Nitrobacter sp. Nb-311A]_x0001_
Culture01_4174_37	Culture01_4174	33326	35356	499632702	hypothetical protein [Nitrobacter winogradskyi]_x0001_
Culture01_4174_38	Culture01_4174	35461	36831	497482370	tRNA modification GTPase TrmE [Nitrobacter sp. Nb-311A]_x0001_
Culture01_4174_39	Culture01_4174	36996	38870	497482371	tRNA uridine 5-carboxymethylaminomethyl modification protein [Nitrobacter sp. Nb-311A]_x0001_
Culture01_4174_40	Culture01_4174	39031	39741	85699223	Glucose inhibited division protein [Nitrobacter sp. Nb-311A]
Culture01_4174_41	Culture01_4174	39726	40595	497482373	chromosome partitioning protein ParA [Nitrobacter sp. Nb-311A]_x0001_
Culture01_4174_42	Culture01_4174	40743	41624	497482374	chromosome partitioning protein ParB [Nitrobacter sp. Nb-311A]_x0001_
Culture01_4174_43	Culture01_4174	41689	42717	497482375	DNA polymerase III subunit delta [Nitrobacter sp. Nb-311A]_x0001_
[truncated: 998 more rows]
